# Supplementary material for: Multi-fold Sonogashira coupling: a new and convenient approach to obtain tetraalkynyl anthracenes with tunable photophysical properties
Source: Royal Society of Chemistry journal article supplement (doi:10.1039/d1ob01861b), 2021-01-01
Supplement: d1ob01861b1.pdf [file d1ob01861b1.pdf]

## Multi-Fold Sonogashira Coupling, A New Convenient Approach to Tetraalkynyl Anthracenes with Tunable Photophysical Properties

Khadimul Islam,<sup>a</sup> Himani Narjinari,<sup>a</sup> Akshara Bisarya,<sup>a</sup> Akshai Kumar\*<sup>a,b,c</sup>

<sup>a</sup>Department of Chemistry, Indian Institute of Technology Guwahati, Guwahati – 781039, Assam, India.

<sup>b</sup>Centre for Nanotechnology, Indian Institute of Technology Guwahati, Guwahati – 781039, Assam, India.

<sup>c</sup>School of Health Science, Indian Institute of Technology Guwahati, Guwahati-781039, Assam, India

*Email id:* [akshaikumar@iitg.ac.in](mailto:akshaikumar@iitg.ac.in)

| <b>Contents</b>                   | <b>Page No.</b> |
|-----------------------------------|-----------------|
| 1. Photophysical Properties       | 2-12            |
| 2. X-Ray Crystallographic Studies | 13-18           |
| 3. NMR, HRMS and MALDI Spectra    | 19-74           |
| 4. IR spectra                     | 75-83           |

## 1. Photophysical Properties:

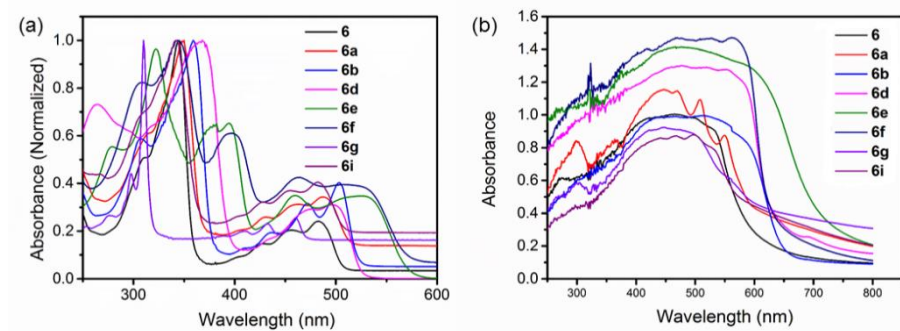

**Figure S1.** (a) Normalized absorption spectra (293 K, 10<sup>-5</sup> M) of **6-6i** in CHCl<sub>3</sub> (b) Absorption spectra (293 K) of the compounds (**6-6i**) in solid powder state.

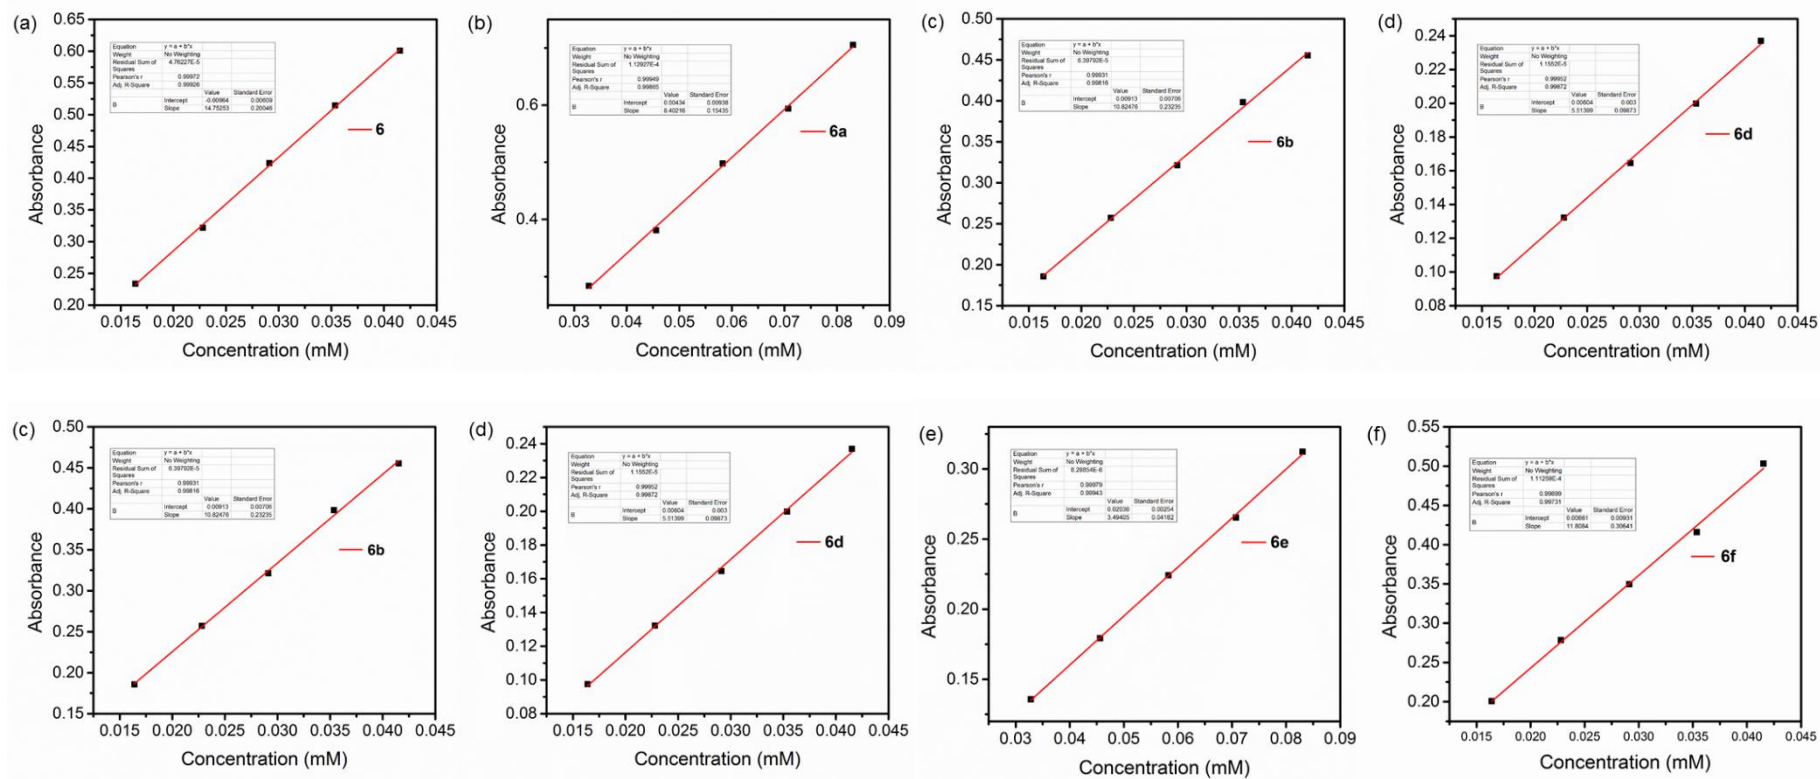

Figure S2. (a-f) Absorbance vs Concentration spectra for the compounds (6-6f) in CHCl<sub>3</sub>.

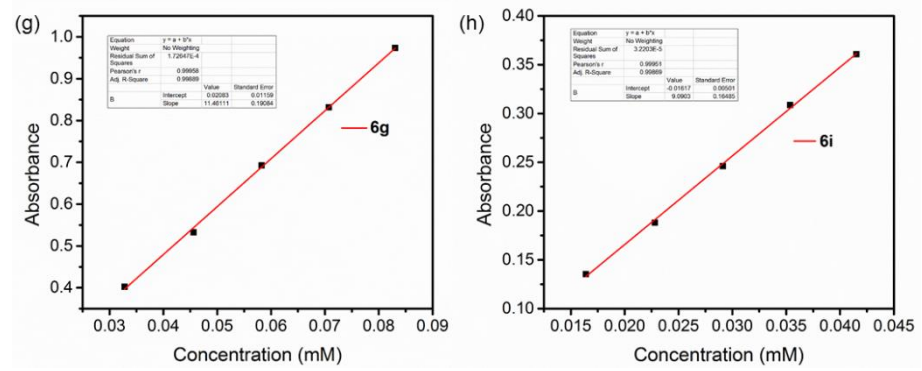

**Figure S3.** (g-h) Absorbance vs Concentration spectra for the compounds (**6g** & **6i**) in  $\text{CHCl}_3$ .

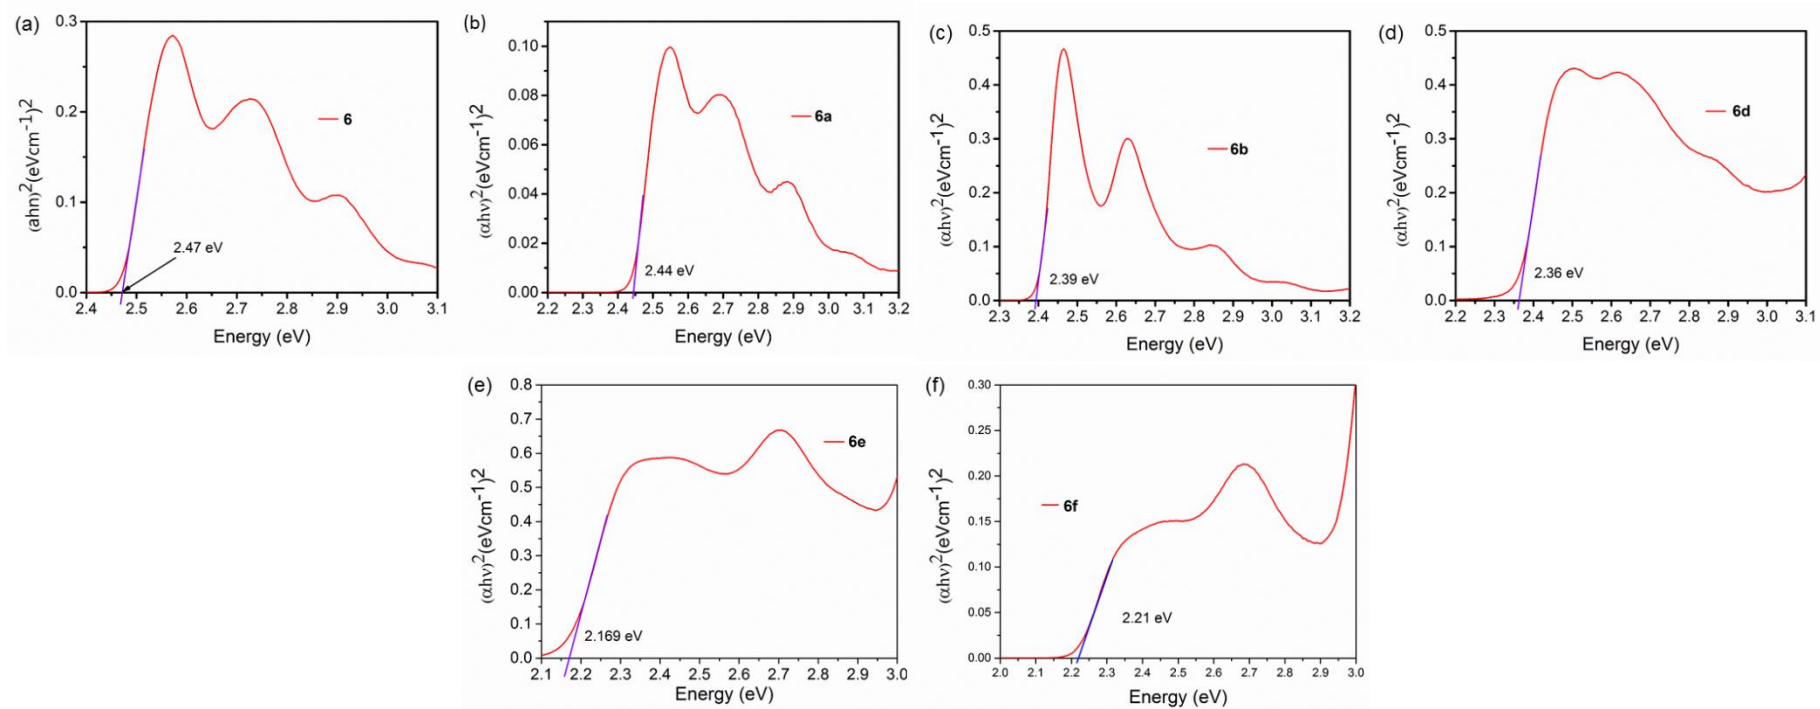

**Figure S4.** (a-f) Tauc's plot from the Absorption spectra (293 K,  $10^{-5}$  M) of **6-6f** in  $\text{CHCl}_3$  for energy band gap calculation.

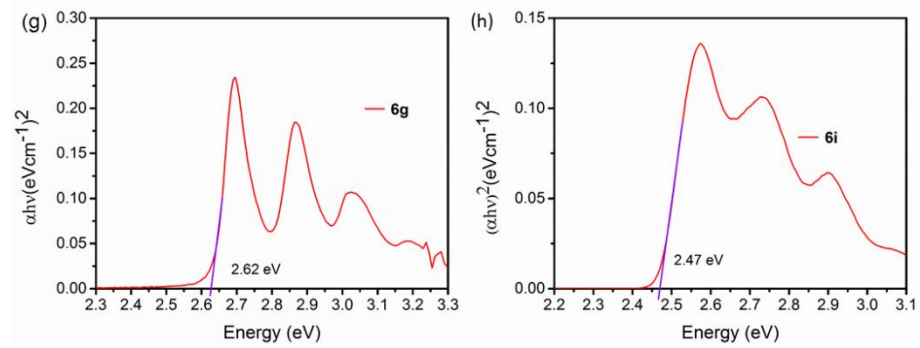

**Figure S5.** (g-h) Tauc's plot from the Absorption spectra (293 K,  $10^{-5}$  M) of **6g** & **6i** in  $\text{CHCl}_3$  for energy band gap calculation.

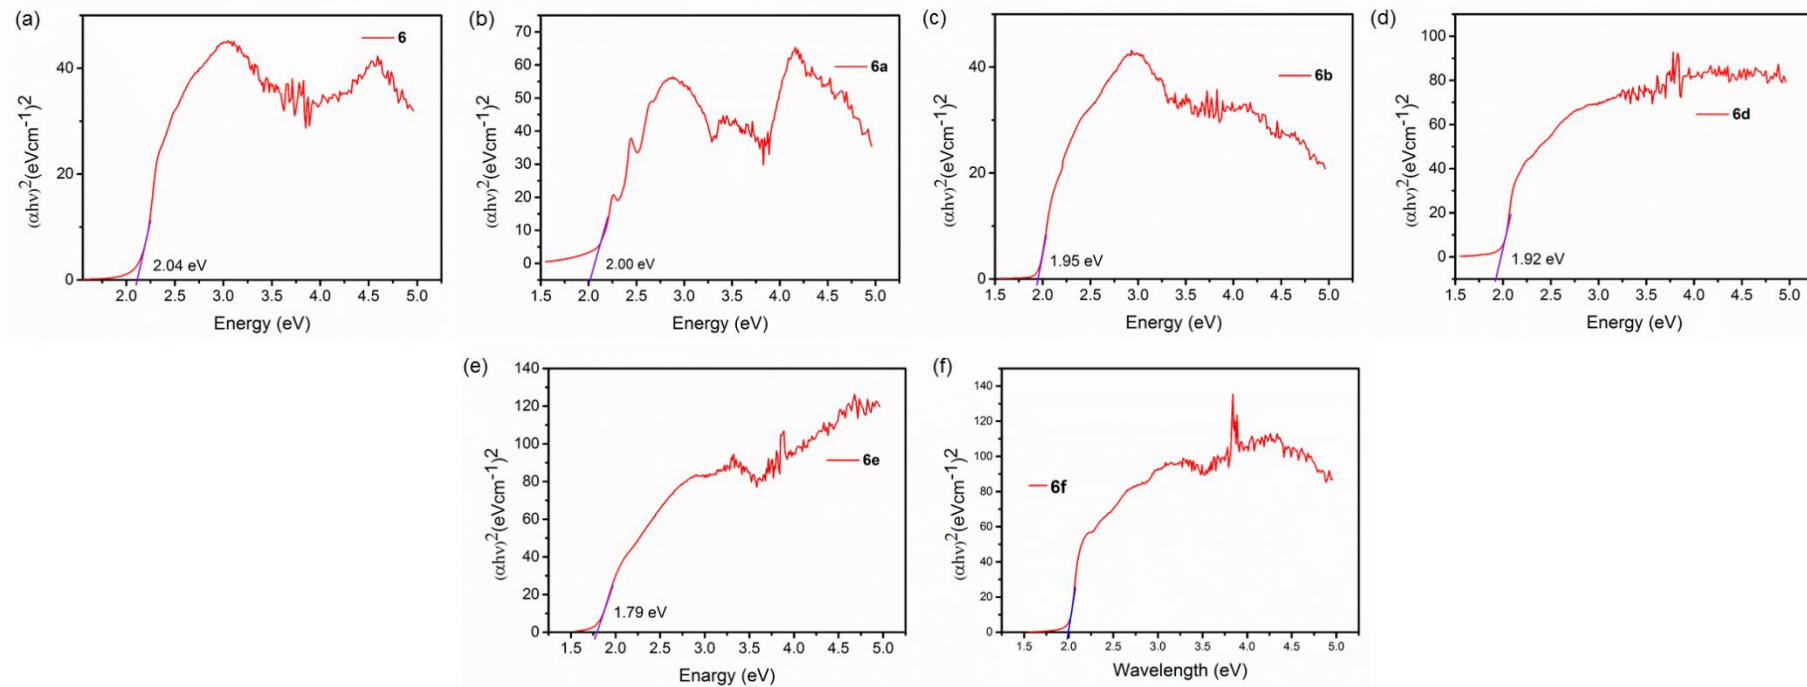

**Figure S6.** (a-f) Tauc's plot from the Absorption spectra of **6-6f** in solid powder state for energy band gap calculation.

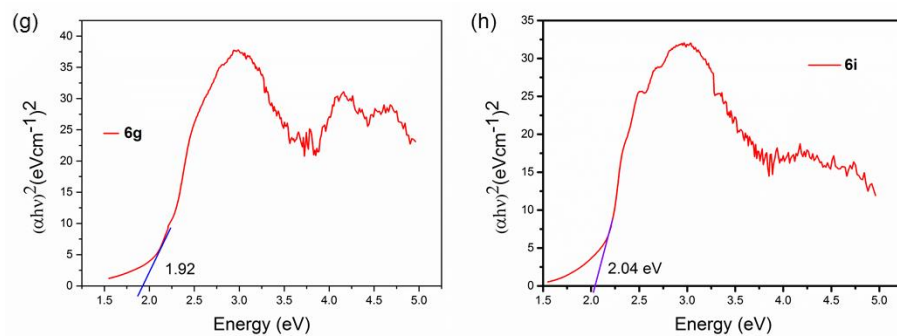

**Figure S7.** (g-h) Tauc's plot from the Absorption spectra of **6g** & **6i** in solid powder state for energy band gap calculation.

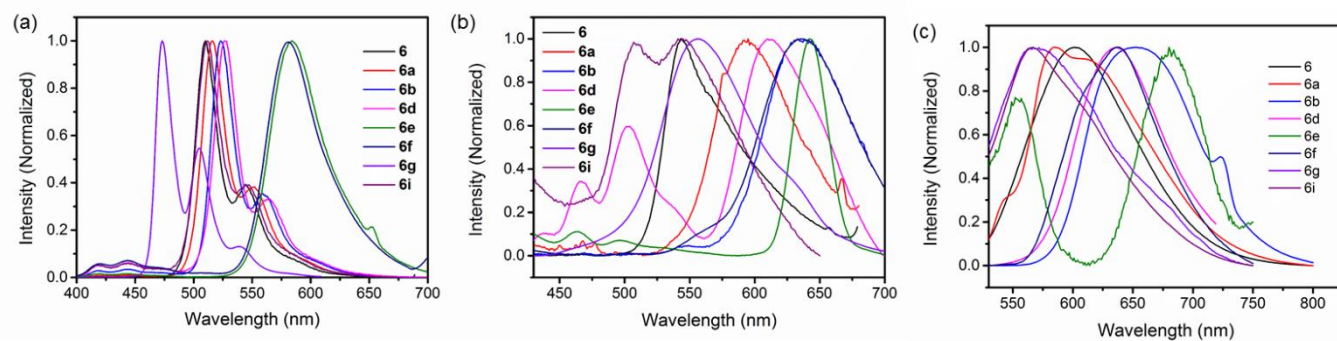

**Figure S8.** Normalized emission spectra in (a) solution ( $\text{CHCl}_3$ , 293 K,  $10^{-6}$  M), (b) thin-film, and (c) solid powder state for the compounds (**6-6i**).



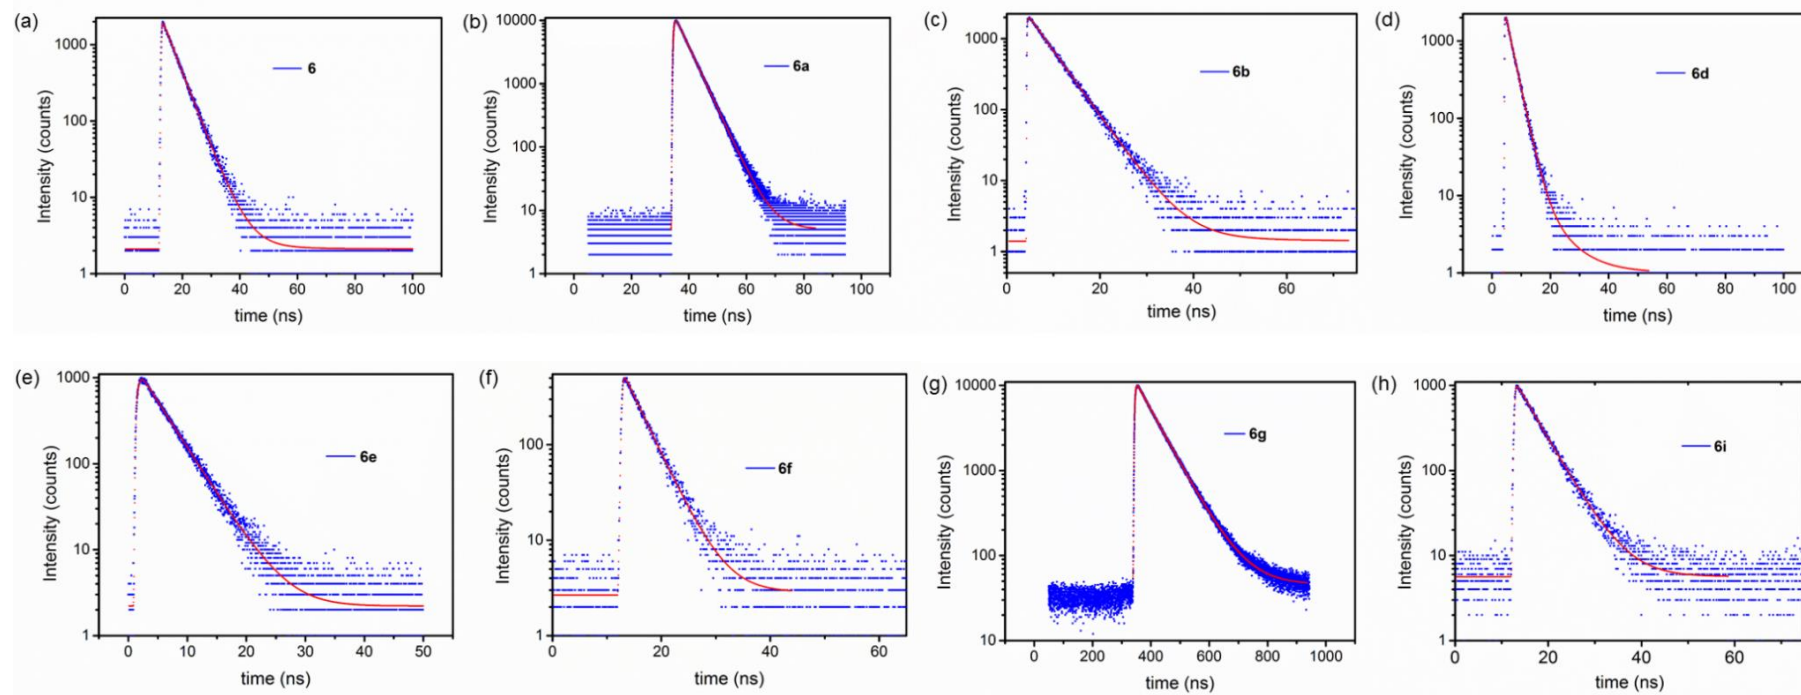

**Figure S9.** Time-resolved Photoluminescence spectra for the compounds **6-6i**.

**Table S1:** Time-resolved Photoluminescence data.

| Compound  | B <sub>1</sub> (%) | $\tau_1$ (ns) | $\tau_1^2$ (ns) | B <sub>2</sub> (%) | $\tau_2$ (ns) | $\tau_2^2$ (ns) | $\tau_{av}$ (ns) |
|-----------|--------------------|---------------|-----------------|--------------------|---------------|-----------------|------------------|
| <b>6</b>  | 99.738             | 4.434         | 19.660          | 0.262              | 15.825        | 250.43          | 4.54             |
| <b>6a</b> | 25.995             | 0.192         | 0.037           | 74.005             | 4.423         | 19.57           | 4.36             |
| <b>6b</b> | 99.824             | 4.714         | 22.222          | 0.176              | 19.922        | 396.886         | 4.83             |
| <b>6d</b> | 96.829             | 2.392         | 5.722           | 3.171              | 8.069         | 65.109          | 2.96             |
| <b>6e</b> | 96.989             | 4.085         | 16.687          | 3.011              | 6.246         | 39.013          | 4.18             |
| <b>6f</b> | 0                  | 0             | 0               | 100                | 3.559         | 12.666          | 3.56             |
| <b>6g</b> | 36.844             | 0.327         | 0.107           | 63.156             | 6.879         | 47.323          | 6.70             |
| <b>6i</b> | 99.877             | 4.562         | 20.812          | 0.123              | 31.450        | 989.103         | 4.79             |

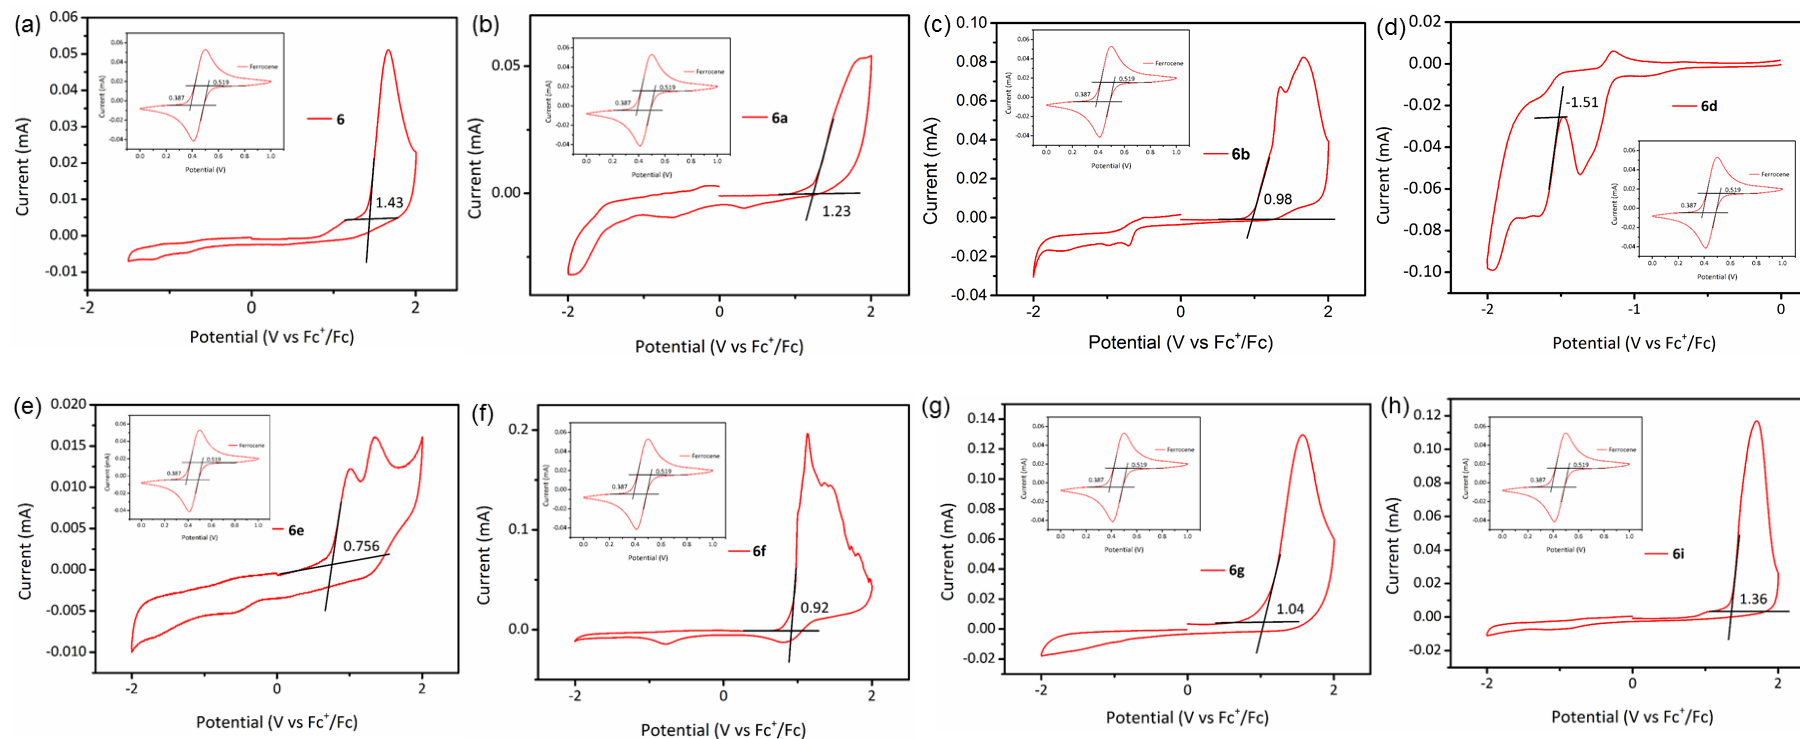

**Figure S10.** Current vs Potential curve for the compounds **6-6i**. During cyclic voltammetry analysis; glassy carbon was used as working electrode, platinum wire was used as counter electrode, Ag/AgCl was used as reference electrode with acetonitrile as solvent. Scan rate is in 50 mV/s.

Scan direction:

**6**; Start voltage = 0.0 V, end voltage = 0.0 V, maximum voltage = +2V, minimum voltage = -1.5 V,

**6a**, **6b**, **6e**, and **6f**; Start voltage = 0.0 V, end voltage = 0.0 V, maximum voltage = +2 V, minimum voltage = -2 V,

**6d**; Start voltage = 0.0 V, end voltage = 0.0 V, maximum voltage = 0.0 V, minimum voltage = -2 V.

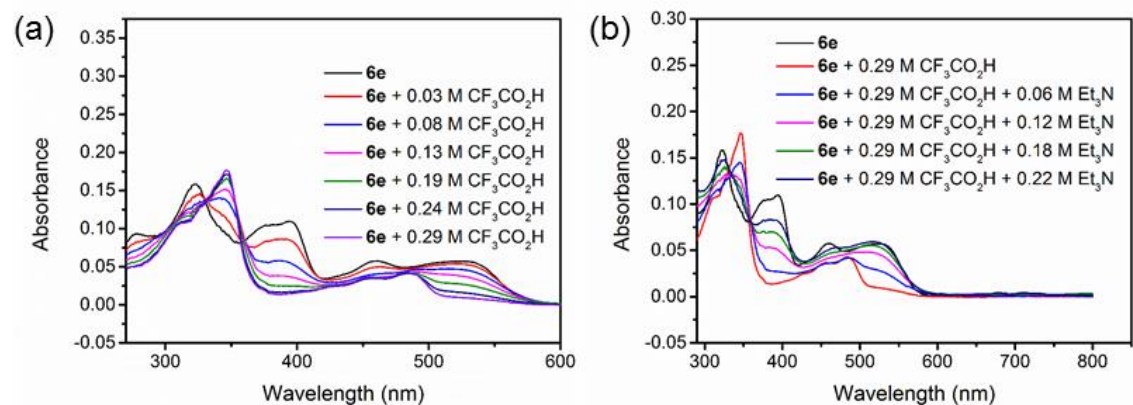

**Figure S11.** a) Titration of the **6e** ( $c = 1 \times 10^{-5}$  M) by  $\text{CF}_3\text{COOH}$  in absorption spectra (b) titration of the **6e** by  $\text{CF}_3\text{COOH}$  and  $\text{Et}_3\text{N}$  in absorption spectra

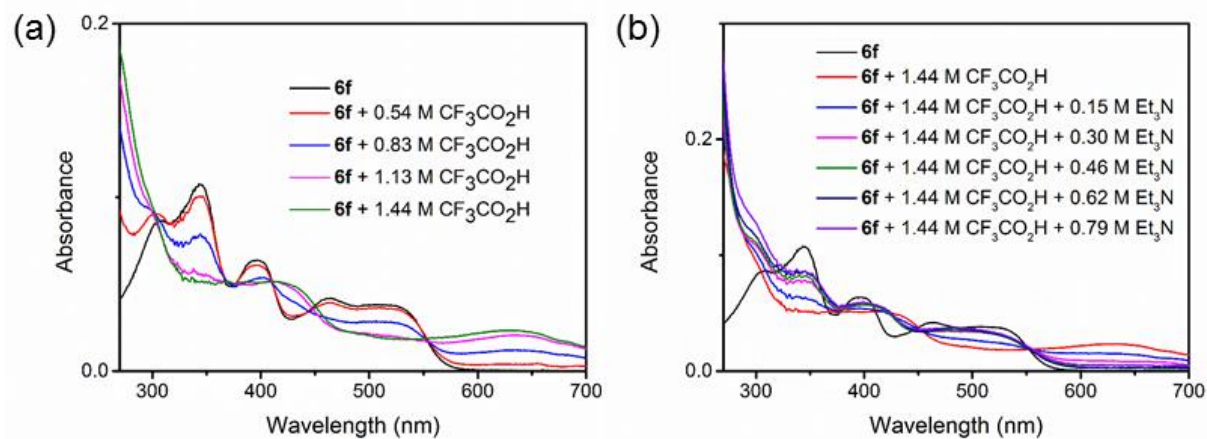

**Figure S12.** a) Titration of the **6f** ( $c = 1 \times 10^{-5}$  M) by  $\text{CF}_3\text{COOH}$  in absorption spectra (b) titration of the **6f** by  $\text{CF}_3\text{COOH}$  and  $\text{Et}_3\text{N}$  in absorption spectra

## 2. X-Ray Crystallographic studies:

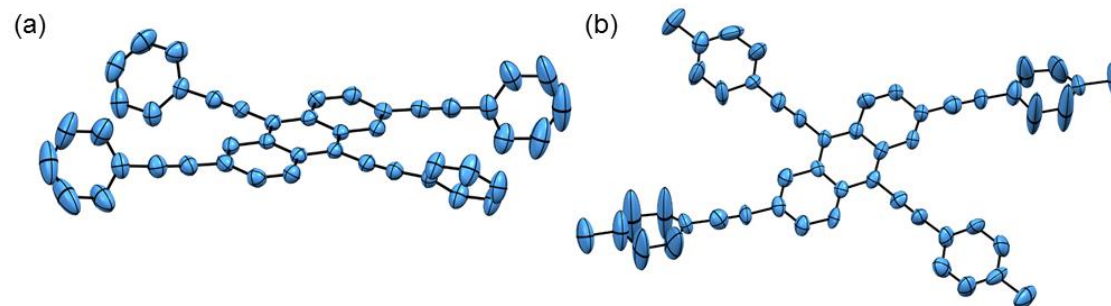

**Figure S13.** ORTEP diagram of (a) **6** and (b) **6a**.

**Table S2.** Crystal data for the compounds (**6**) and (**6a**):

|                                             | <b>6</b>                                                   | <b>6a</b>                                                  |
|---------------------------------------------|------------------------------------------------------------|------------------------------------------------------------|
| Identification code (CCDC No)               | 2070944                                                    | 2070945                                                    |
| Empirical formula                           | C <sub>46</sub> H <sub>26</sub>                            | C <sub>50</sub> H <sub>34</sub>                            |
| Formula weight                              | 578.67                                                     | 634.77                                                     |
| Temperature/K                               | 296(2)                                                     | 296(2)                                                     |
| Space group                                 | P21/n                                                      | Pc                                                         |
| Crystal system                              | Monoclinic                                                 | Monoclinic                                                 |
| a/Å                                         | 9.8457(7)                                                  | 14.929(3)                                                  |
| b/Å                                         | 19.1932(16)                                                | 11.922(3)                                                  |
| c/Å                                         | 17.0462(14)                                                | 10.529(2)                                                  |
| $\alpha$ /°                                 | 90.00                                                      | 90.00                                                      |
| $\beta$ /°                                  | 101.212(2)                                                 | 92.393(7)                                                  |
| $\gamma$ /°                                 | 90.00                                                      | 90.00                                                      |
| Volume/Å <sup>3</sup>                       | 3159.7(4)                                                  | 1872.3(7)                                                  |
| Z                                           | 4                                                          | 2                                                          |
| $\rho_{\text{calc}}$ g/cm <sup>3</sup>      | 1.216                                                      | 1.126                                                      |
| $\mu$ /mm <sup>-1</sup>                     | 0.069                                                      | 0.064                                                      |
| F(000)                                      | 1208.0                                                     | 668.0                                                      |
| Crystal size/mm <sup>3</sup>                | 0.28 × 0.26 × 0.24                                         | 0.28 × 0.25 × 0.24                                         |
| Radiation                                   | MoK $\alpha$ ( $\lambda$ = 0.71073)                        | MoK $\alpha$ ( $\lambda$ = 0.71073)                        |
| 2 $\theta$ range for data collection/°      | 4.24 to 50                                                 | 5.16 to 50                                                 |
| Index ranges                                | -11 ≤ h ≤ 11, -22 ≤ k ≤ 22, -20 ≤ l ≤ 20                   | -17 ≤ h ≤ 17, -14 ≤ k ≤ 14, -12 ≤ l ≤ 12                   |
| Reflections collected                       | 198842                                                     | 45579                                                      |
| Independent reflections                     | 5566 [R <sub>int</sub> = 0.1546, R <sub>sigma</sub> = N/A] | 6588 [R <sub>int</sub> = 0.1745, R <sub>sigma</sub> = N/A] |
| Data/restraints/parameters                  | 5566/0/415                                                 | 6588/2/455                                                 |
| Goodness-of-fit on F <sup>2</sup>           | 1.056                                                      | 1.026                                                      |
| Final R indexes [I ≥ 2 $\sigma$ (I)]        | R <sub>1</sub> = 0.0586, wR <sub>2</sub> = 0.1501          | R <sub>1</sub> = 0.0836, wR <sub>2</sub> = 0.1984          |
| Final R indexes [all data]                  | R <sub>1</sub> = 0.0911, wR <sub>2</sub> = 0.1746          | R <sub>1</sub> = 0.1812, wR <sub>2</sub> = 0.2604          |
| Largest diff. peak/hole / e Å <sup>-3</sup> | 0.13/-0.24                                                 | 0.24/-0.23                                                 |

**Alert level A of the crystal 6a.**

SHFSU01\_ALERT\_2\_A The absolute value of parameter shift to su ratio > 0.20

Absolute value of the parameter shift to su ratio given 0.326

Additional refinement cycles may be required.

PLAT080\_ALERT\_2\_A Maximum Shift/Error ..... 0.33 Why?

PLAT242\_ALERT\_2\_A Low 'MainMol' Ueq as Compared to Neighbors of C47 Check

Author Response:

The crystal quality was very poor. The crystal was grown by multiple times in different possible ways but it decomposed during the data collection, but the reported data is the best than other collected data. These alerts are shown owing to nonconvergent refinement to one carbon in one of the phenyl ring.

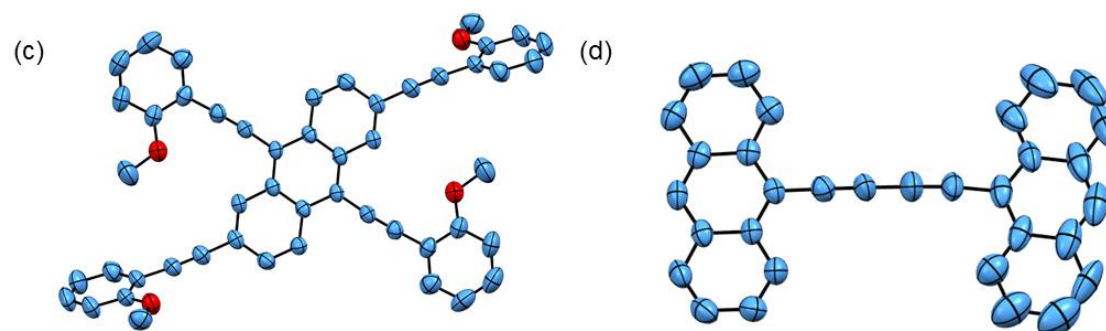

**Figure S14.** ORTEP diagram of (c) **6b** and (d) **6c'**.

**Table S3.** Crystal data for compounds (**6b**) and (**6c'**).

|                                             | <b>6b</b>                                                  | <b>6c'</b>                                                 |
|---------------------------------------------|------------------------------------------------------------|------------------------------------------------------------|
| Identification code (CCDC No)               | 2070946                                                    | 2086685                                                    |
| Empirical formula                           | C <sub>50</sub> H <sub>34</sub> O <sub>4</sub>             | C <sub>32</sub> H <sub>18</sub>                            |
| Formula weight                              | 698.77                                                     | 402.46                                                     |
| Temperature/K                               | 296(2)                                                     | 296(2)                                                     |
| Crystal system                              | triclinic                                                  | orthorhombic                                               |
| Space group                                 | P-1                                                        | P21/n                                                      |
| a/Å                                         | 4.6663(5)                                                  | 11.162(3)                                                  |
| b/Å                                         | 14.0000(16)                                                | 11.978(3)                                                  |
| c/Å                                         | 14.5094(17)                                                | 15.916(4)                                                  |
| $\alpha$ /°                                 | 75.898(4)                                                  | 90.00                                                      |
| $\beta$ /°                                  | 83.094(4)                                                  | 90.00                                                      |
| $\gamma$ /°                                 | 83.357(4)                                                  | 90.00                                                      |
| Volume/Å <sup>3</sup>                       | 908.96(18)                                                 | 2128.0(9)                                                  |
| Z                                           | 1                                                          | 4                                                          |
| $\rho_{\text{calc}}/\text{cm}^3$            | 1.254                                                      | 1.256                                                      |
| $\mu/\text{mm}^{-1}$                        | 0.079                                                      | 0.071                                                      |
| F(000)                                      | 354.0                                                      | 924.0                                                      |
| Crystal size/mm <sup>3</sup>                | 0.28 × 0.25 × 0.23                                         | 0.30 × 0.27 × 0.25                                         |
| Radiation                                   | MoK $\alpha$ ( $\lambda$ = 0.71073)                        | MoK $\alpha$ ( $\lambda$ = 0.71073)                        |
| 2 $\Theta$ range for data collection/°      | 4.64 to 50                                                 | 4.98 to 50                                                 |
| Index ranges                                | -5 ≤ h ≤ 5, -16 ≤ k ≤ 16, -17 ≤ l ≤ 17                     | -13 ≤ h ≤ 13, -14 ≤ k ≤ 14, -18 ≤ l ≤ 17                   |
| Reflections collected                       | 22015                                                      | 12932                                                      |
| Independent reflections                     | 3217 [R <sub>int</sub> = 0.0933, R <sub>sigma</sub> = N/A] | 3065 [R <sub>int</sub> = 0.1000, R <sub>sigma</sub> = N/A] |
| Data/restraints/parameters                  | 3217/0/246                                                 | 3065/0/289                                                 |
| Goodness-of-fit on F <sup>2</sup>           | 0.762                                                      | 0.790                                                      |
| Final R indexes [I >= 2 $\sigma$ (I)]       | R <sub>1</sub> = 0.0470, wR <sub>2</sub> = 0.1239          | R <sub>1</sub> = 0.0719, wR <sub>2</sub> = 0.2009          |
| Final R indexes [all data]                  | R <sub>1</sub> = 0.0978, wR <sub>2</sub> = 0.1609          | R <sub>1</sub> = 0.1641, wR <sub>2</sub> = 0.2674          |
| Largest diff. peak/hole / e Å <sup>-3</sup> | 0.16/-0.15                                                 | 0.16/-0.12                                                 |



**Alert level A of the crystal 6c'.**

PLAT029\_ALERT\_3\_A \_diffrn\_measured\_fraction\_theta\_full value Low. 0.815 Why?

Author Response:

The completeness was low due to weak diffraction quality of the crystal.

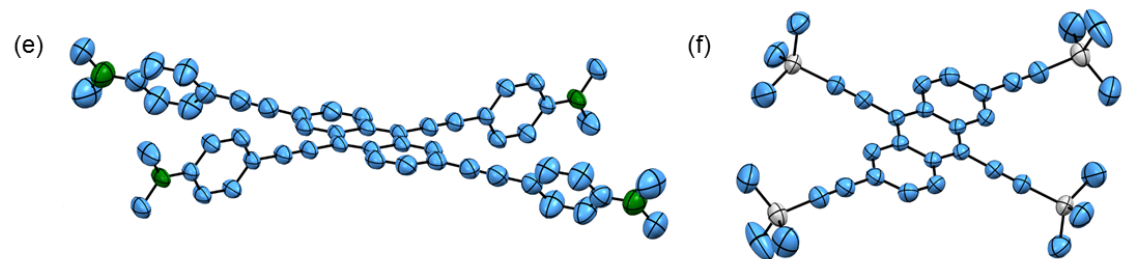

**Figure S15.** ORTEP diagram of (e) **6e** and (f) **6g**.

**Table S4.** Crystal data for compounds (**6e**) and (**6g**).

|                                             | <b>6e</b>                                                     | <b>6g</b>                                                     |
|---------------------------------------------|---------------------------------------------------------------|---------------------------------------------------------------|
| Identification code (CCDC No)               | 2070947                                                       | 2070948                                                       |
| Empirical formula                           | C <sub>54</sub> H <sub>60</sub> N <sub>4</sub>                | C <sub>34</sub> H <sub>42</sub> Si <sub>4</sub>               |
| Formula weight                              | 765.105                                                       | 563.054                                                       |
| Temperature/K                               | 296.15                                                        | 296.15                                                        |
| Crystal system                              | triclinic                                                     | triclinic                                                     |
| Space group                                 | P-1                                                           | P-1                                                           |
| a/Å                                         | 9.2771(9)                                                     | 6.0741(8)                                                     |
| b/Å                                         | 9.6139(8)                                                     | 11.2759(16)                                                   |
| c/Å                                         | 14.3349(14)                                                   | 14.146(2)                                                     |
| α/°                                         | 71.119(3)                                                     | 99.128(5)                                                     |
| β/°                                         | 86.812(4)                                                     | 96.304(5)                                                     |
| γ/°                                         | 61.782(3)                                                     | 105.017(4)                                                    |
| Volume/Å <sup>3</sup>                       | 1058.66(18)                                                   | 912.3(2)                                                      |
| Z                                           | 1                                                             | 1                                                             |
| ρ <sub>calc</sub> /cm <sup>3</sup>          | 1.200                                                         | 1.025                                                         |
| μ/mm <sup>-1</sup>                          | 0.070                                                         | 0.182                                                         |
| F(000)                                      | 412.1                                                         | 302.4                                                         |
| Crystal size/mm <sup>3</sup>                | 0.29 × 0.26 × 0.24                                            | 0.28 × 0.26 × 0.24                                            |
| Radiation                                   | Mo Kα (λ = 0.71073)                                           | Mo Kα (λ = 0.71073)                                           |
| 2θ range for data collection/°              | 4.98 to 50                                                    | 3.82 to 50                                                    |
| Index ranges                                | -12 ≤ h ≤ 12, -12 ≤ k ≤ 12, -18 ≤ l ≤ 18                      | -8 ≤ h ≤ 8, -14 ≤ k ≤ 15, -18 ≤ l ≤ 18                        |
| Reflections collected                       | 31337                                                         | 32125                                                         |
| Independent reflections                     | 3727 [R <sub>int</sub> = 0.1317, R <sub>sigma</sub> = 0.0930] | 3212 [R <sub>int</sub> = 0.0810, R <sub>sigma</sub> = 0.0558] |
| Data/restraints/parameters                  | 3727/0/266                                                    | 3212/0/178                                                    |
| Goodness-of-fit on F <sup>2</sup>           | 0.874                                                         | 1.027                                                         |
| Final R indexes [I >= 2σ (I)]               | R <sub>1</sub> = 0.0562, wR <sub>2</sub> = 0.1554             | R <sub>1</sub> = 0.0437, wR <sub>2</sub> = 0.1168             |
| Final R indexes [all data]                  | R <sub>1</sub> = 0.1111, wR <sub>2</sub> = 0.1949             | R <sub>1</sub> = 0.0662, wR <sub>2</sub> = 0.1280             |
| Largest diff. peak/hole / e Å <sup>-3</sup> | 0.21/-0.23                                                    | 0.21/-0.22                                                    |

### 3. NMR and MALDI spectra

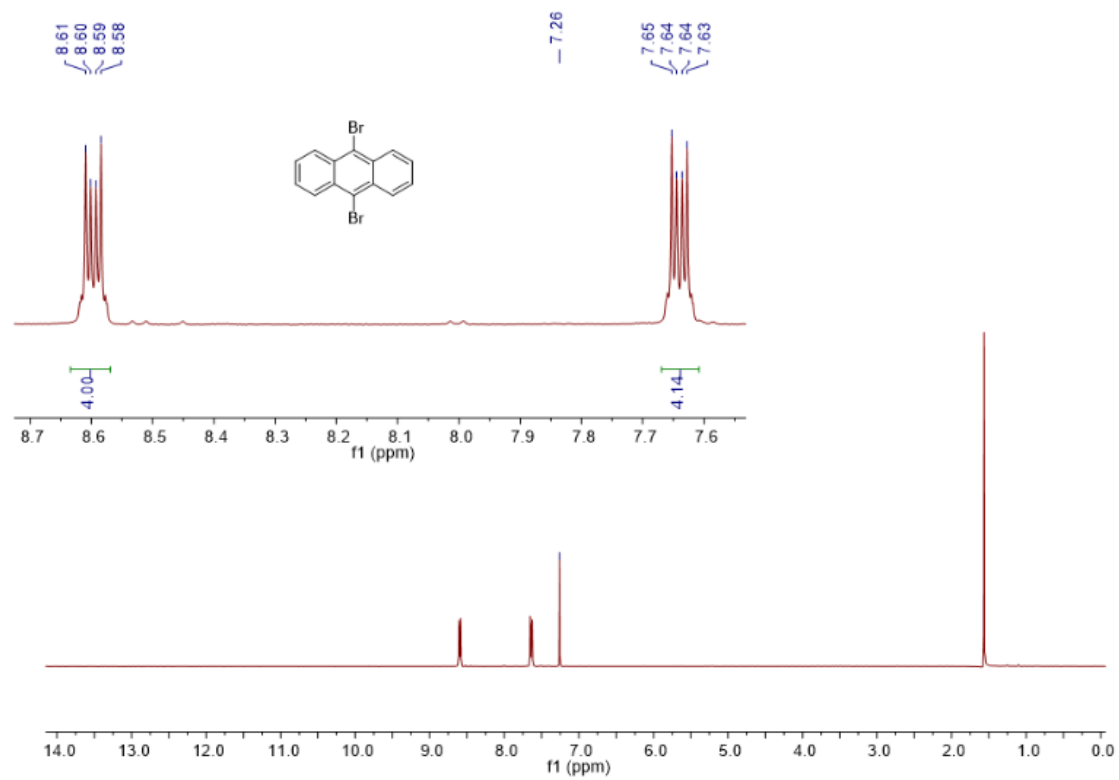

**Figure S16.**  $^1\text{H}$  NMR spectrum of **2** (400 MHz,  $\text{CDCl}_3$ ).

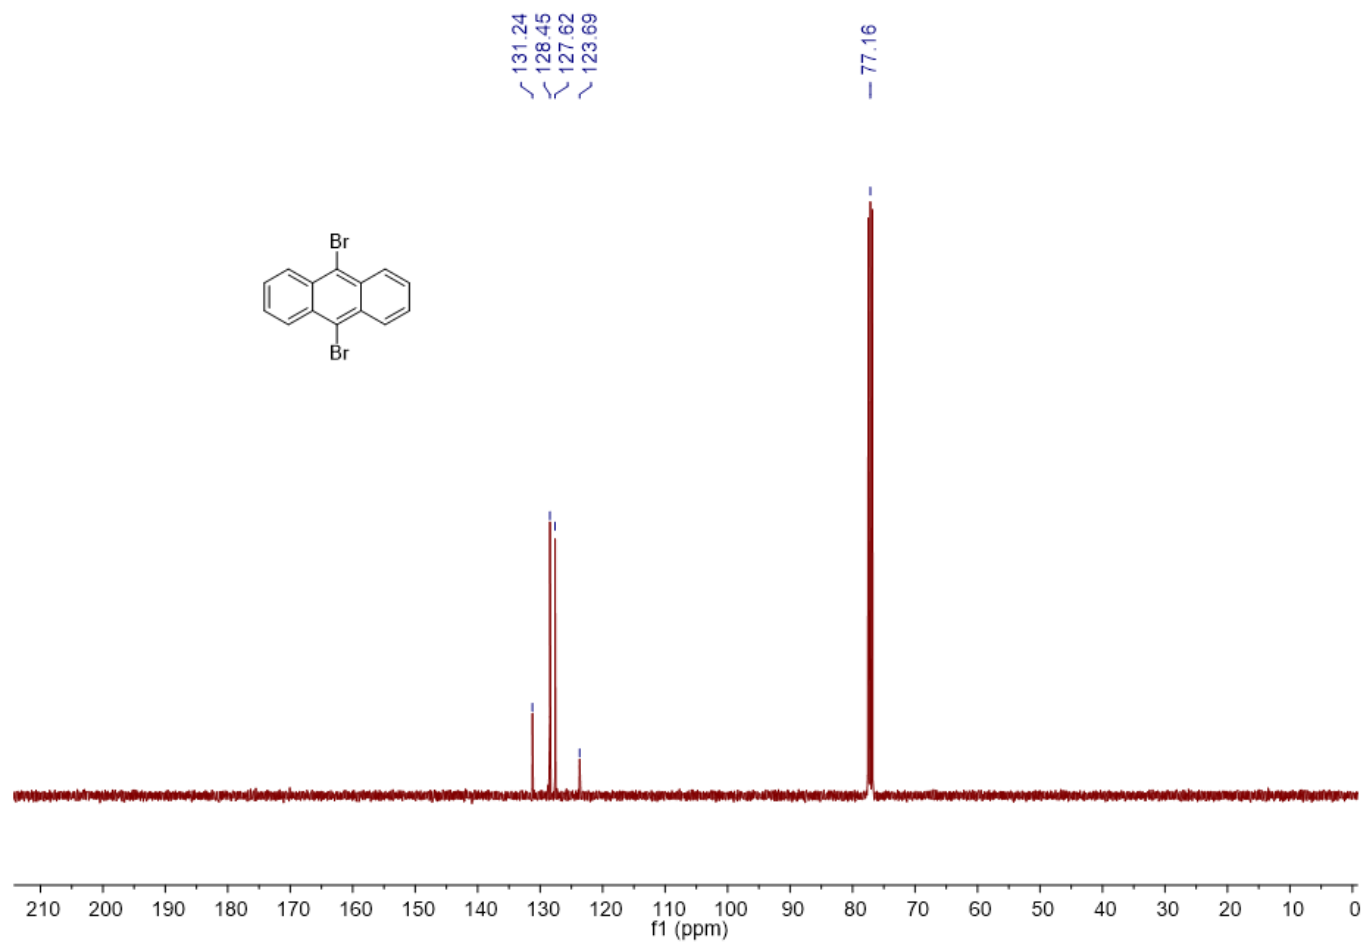

**Figure S17.**  $^{13}\text{C}\{^1\text{H}\}$  NMR spectrum of **2** (101 MHz,  $\text{CDCl}_3$ ).

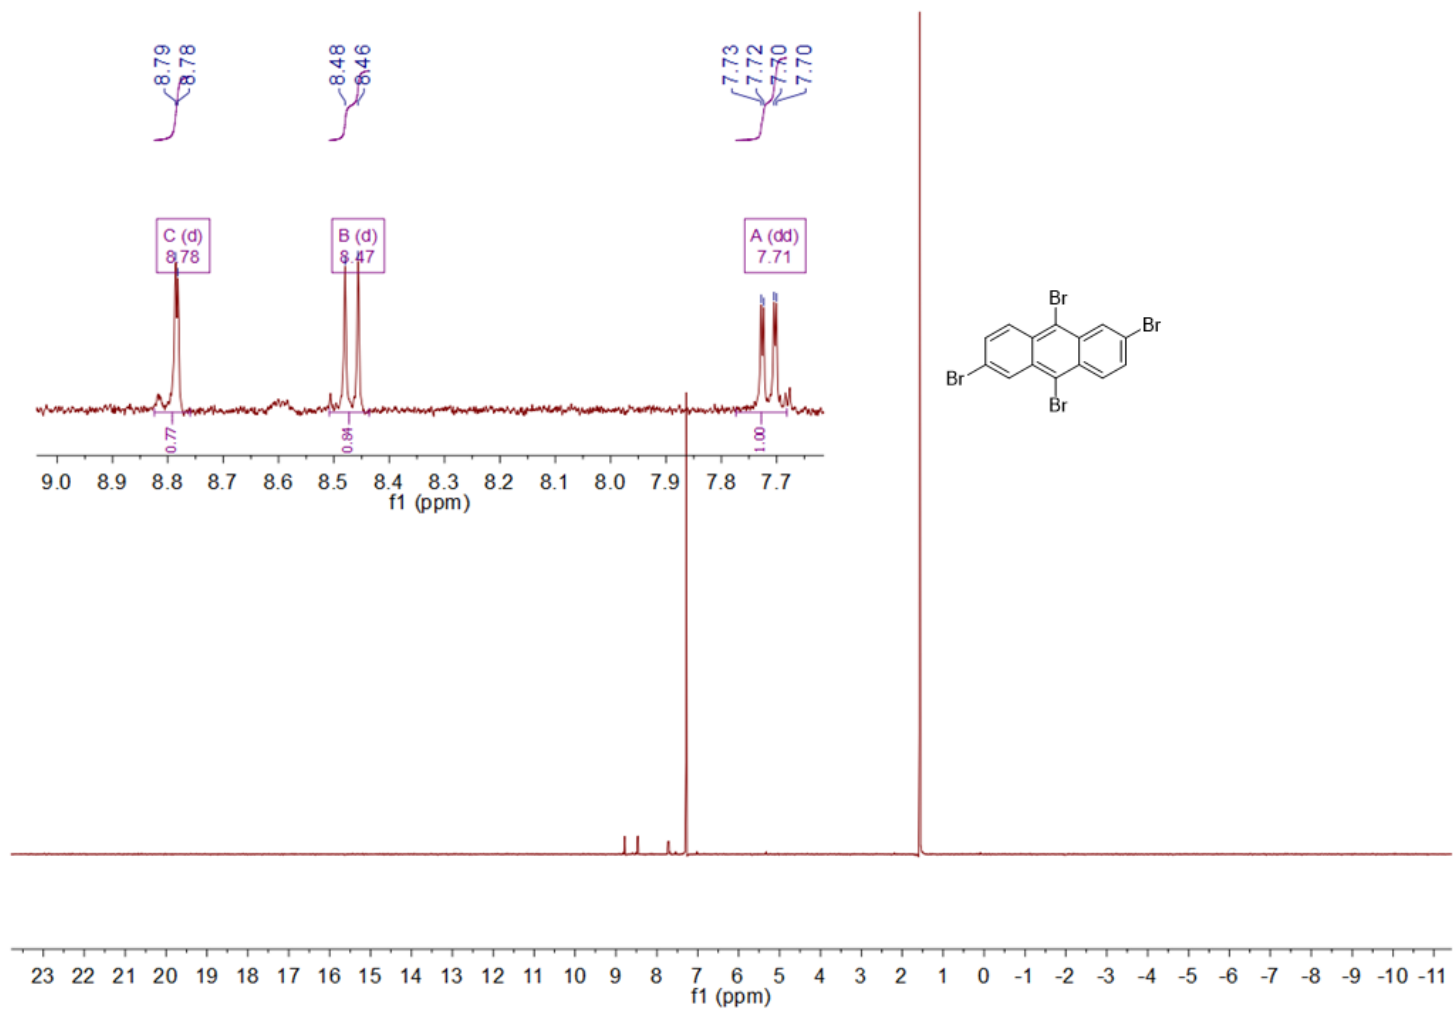

**Figure S18.**  $^1\text{H}$  NMR spectrum of **3** (400 MHz,  $\text{CDCl}_3$ ).

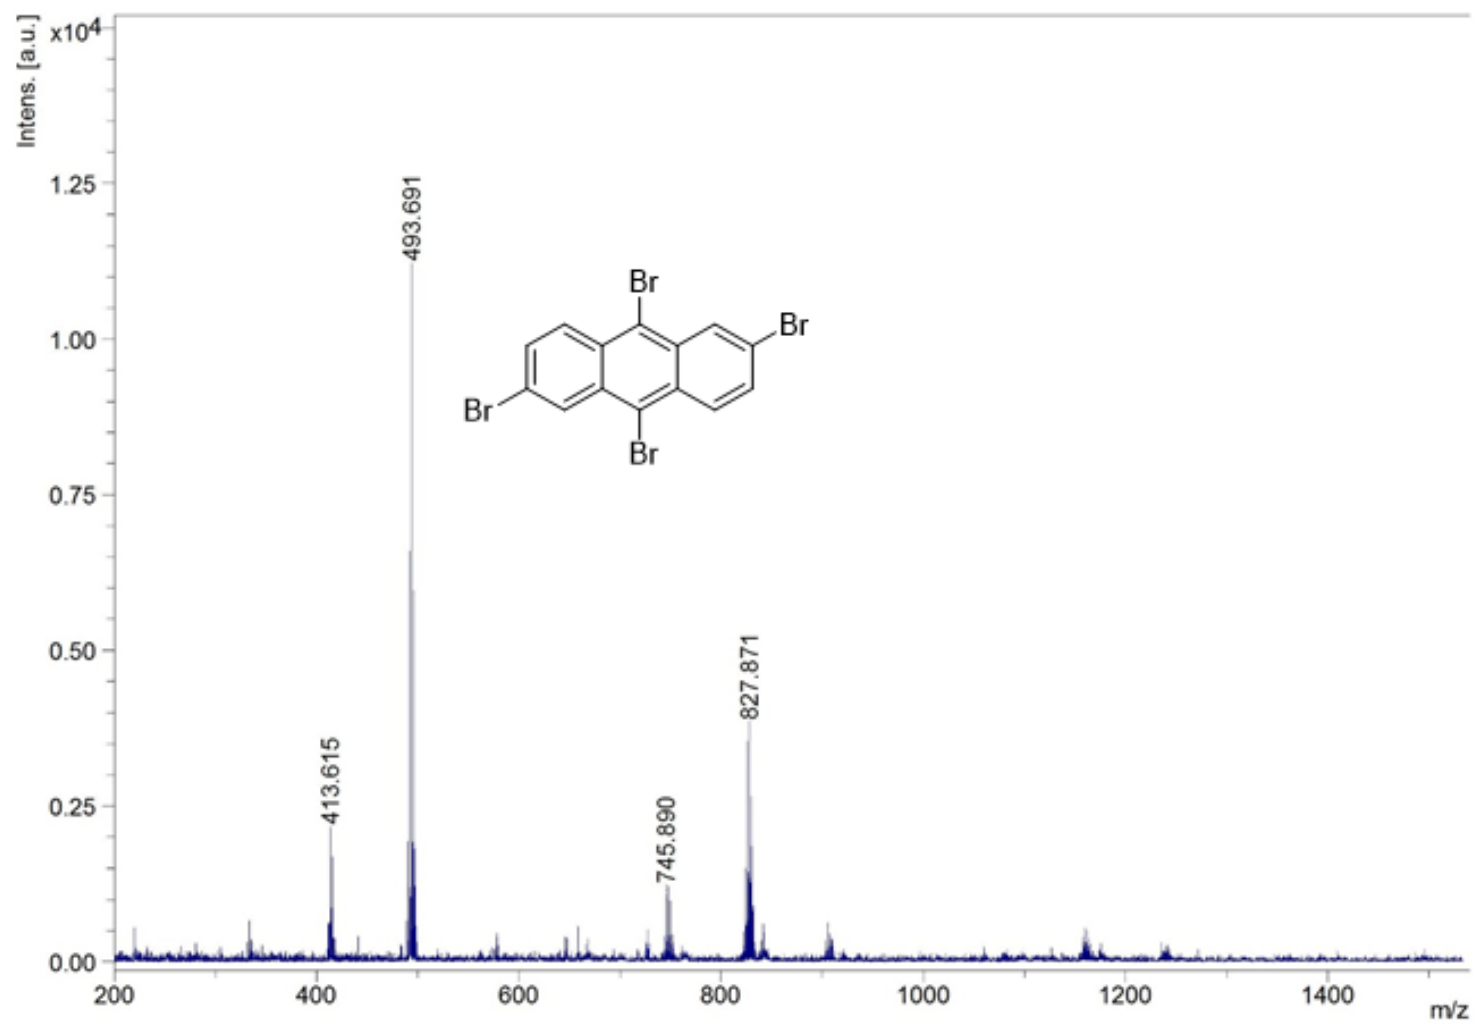

Figure S19. MALDI spectrum of 3.

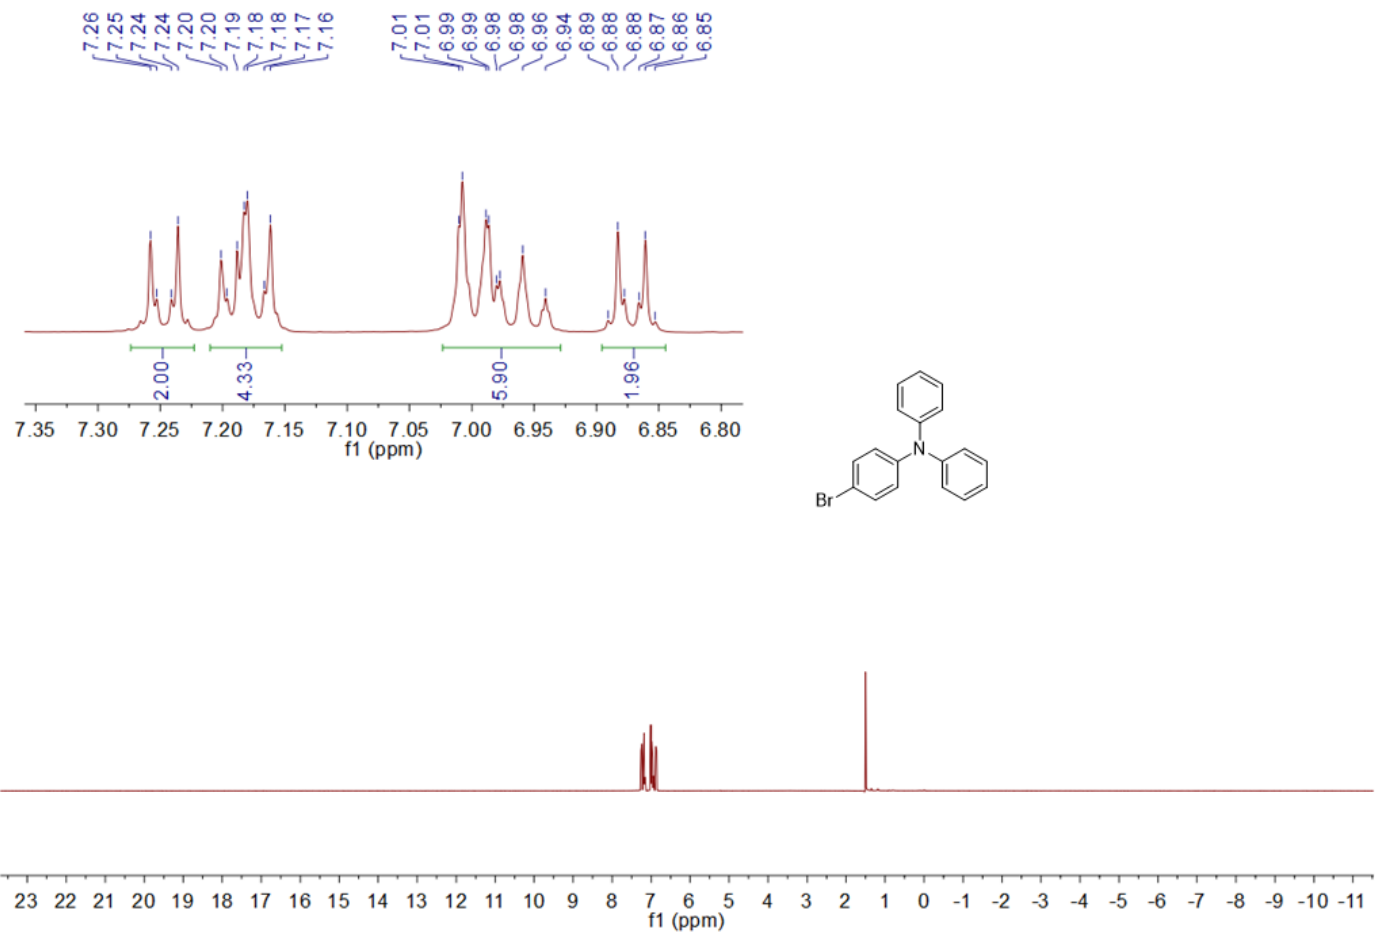

**Figure S20.**  $^1\text{H}$  NMR spectrum of **7** (400 MHz,  $\text{CDCl}_3$ ).

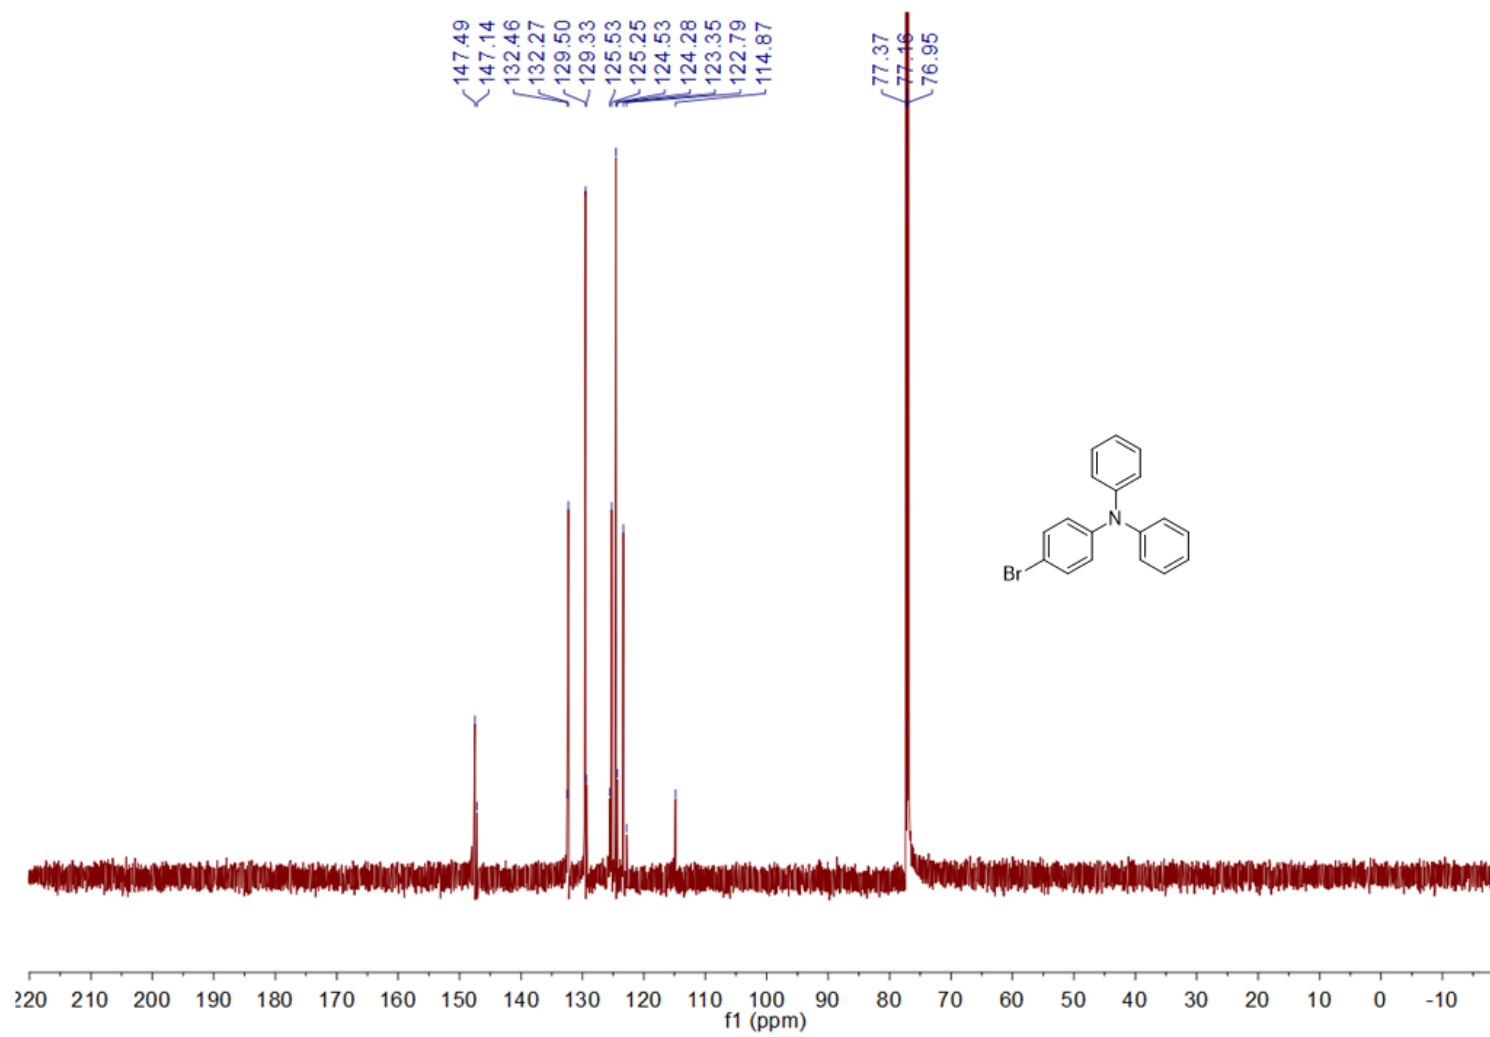

**Figure S21.**  $^{13}\text{C}\{^1\text{H}\}$  NMR spectrum of **7** (151 MHz,  $\text{CDCl}_3$ )



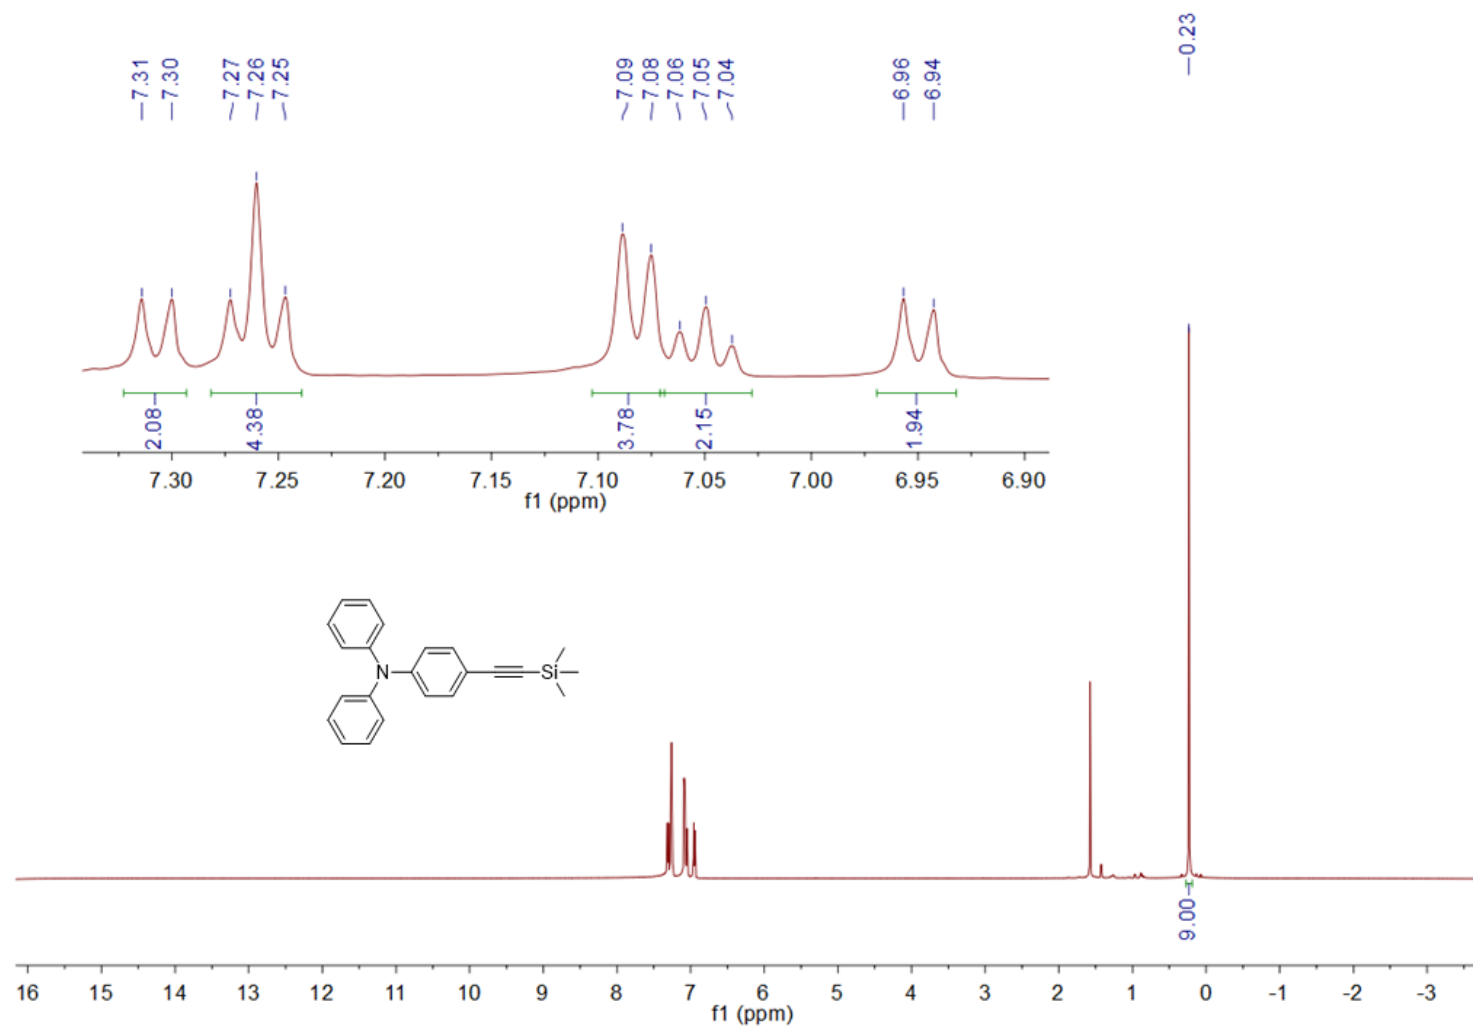

**Figure S22.**  $^1\text{H}$  NMR spectrum of **8** (600 MHz,  $\text{CDCl}_3$ ).

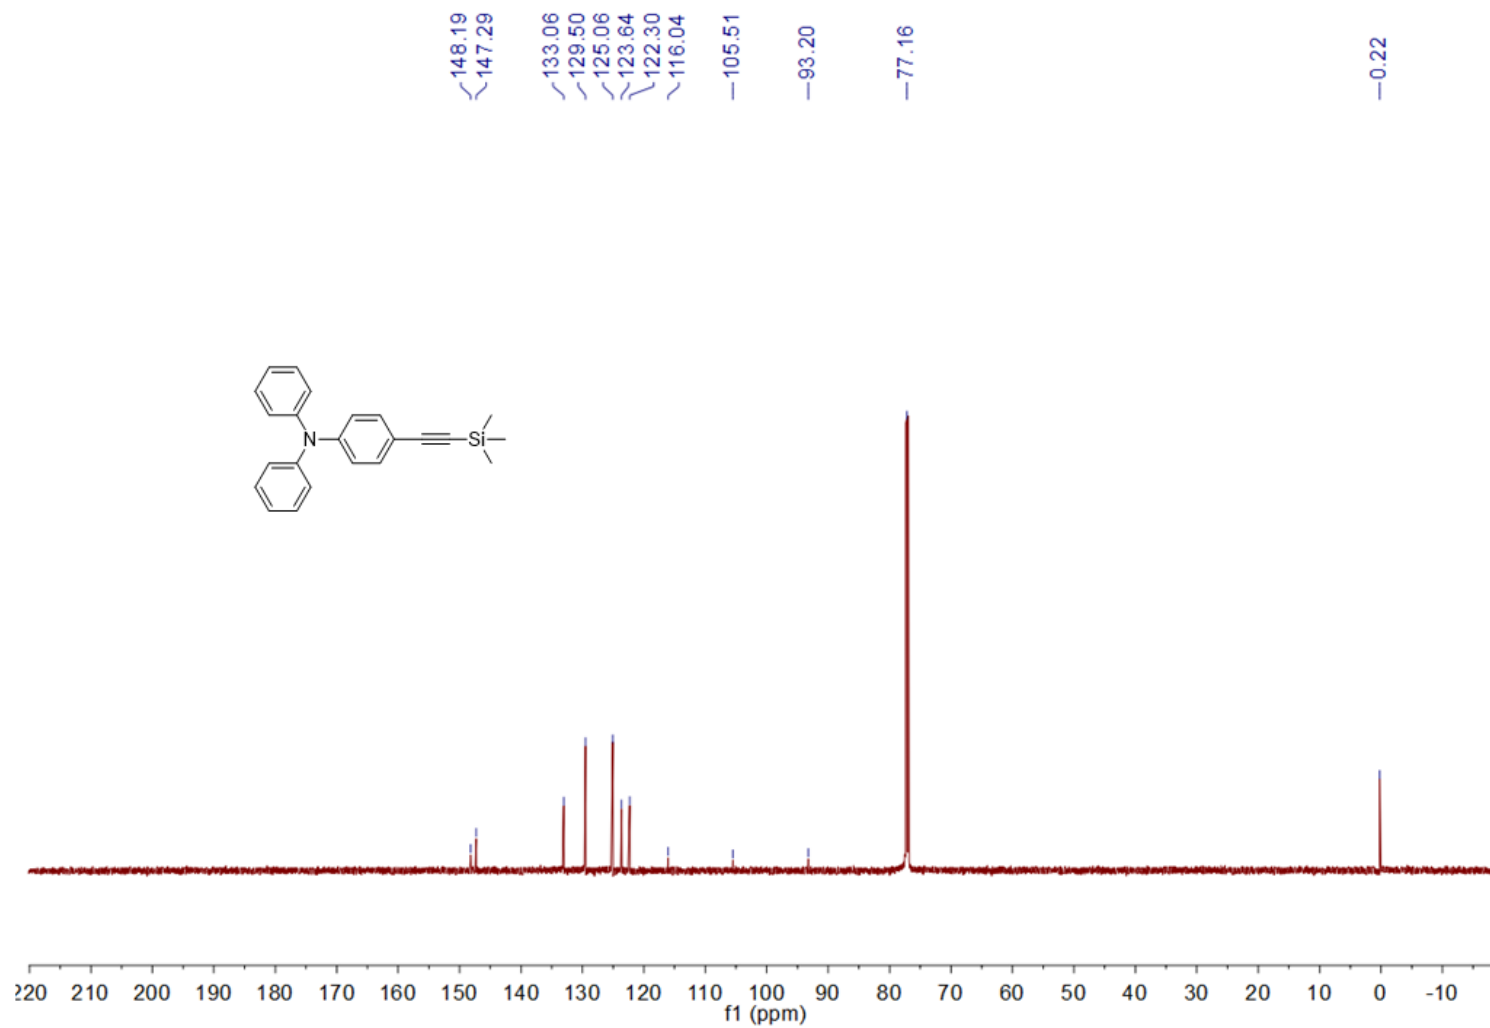

**Figure S23.**  $^{13}\text{C}\{^1\text{H}\}$  NMR spectrum of **8** (151 MHz,  $\text{CDCl}_3$ )

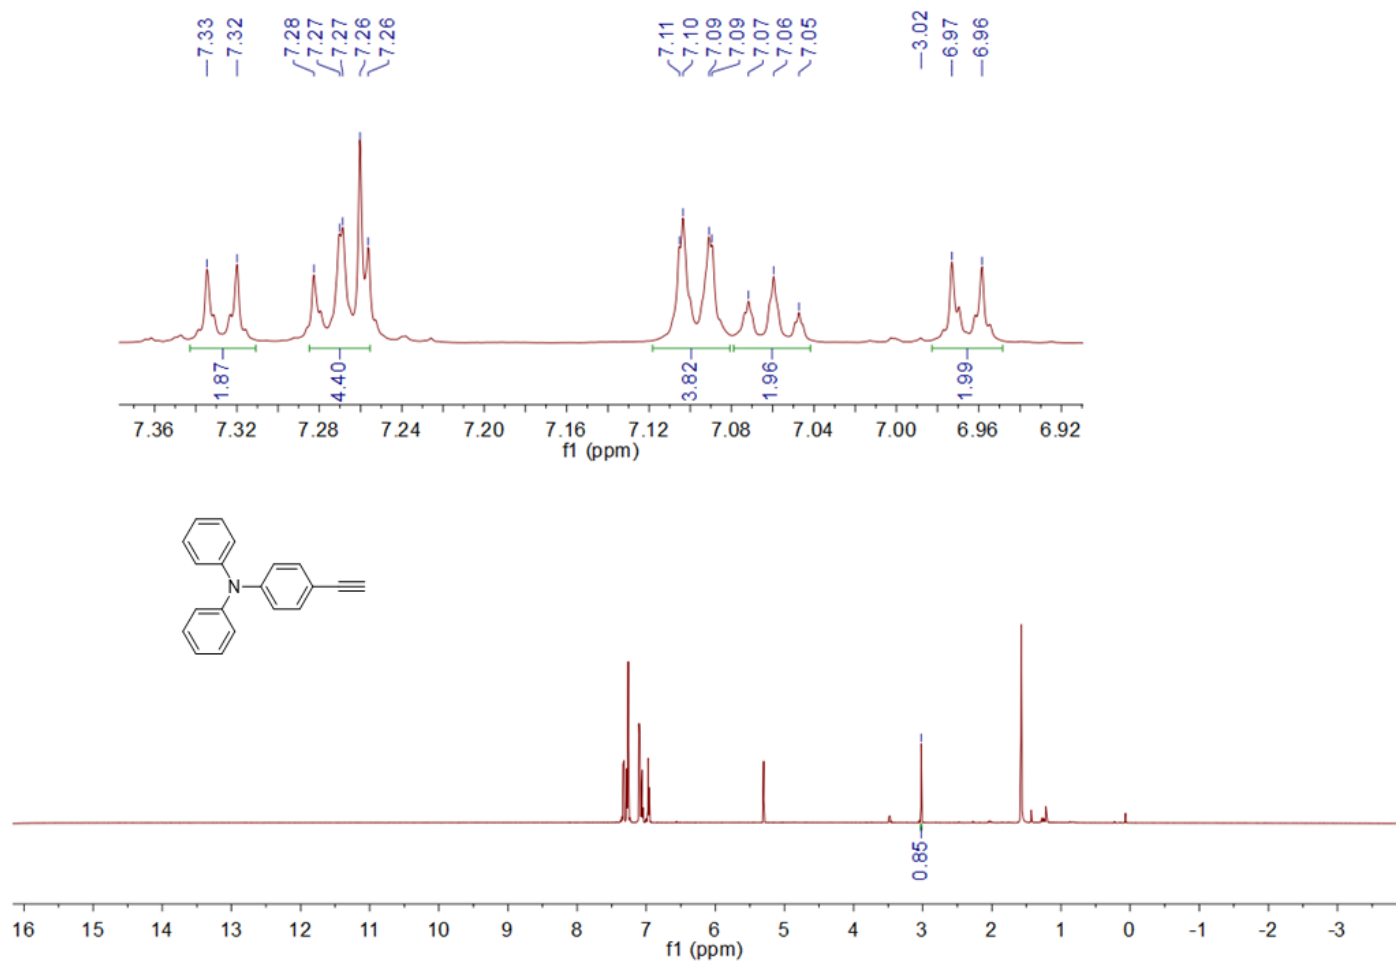

**Figure S24.** <sup>1</sup>H NMR spectrum of **9** (600 MHz, CDCl<sub>3</sub>).

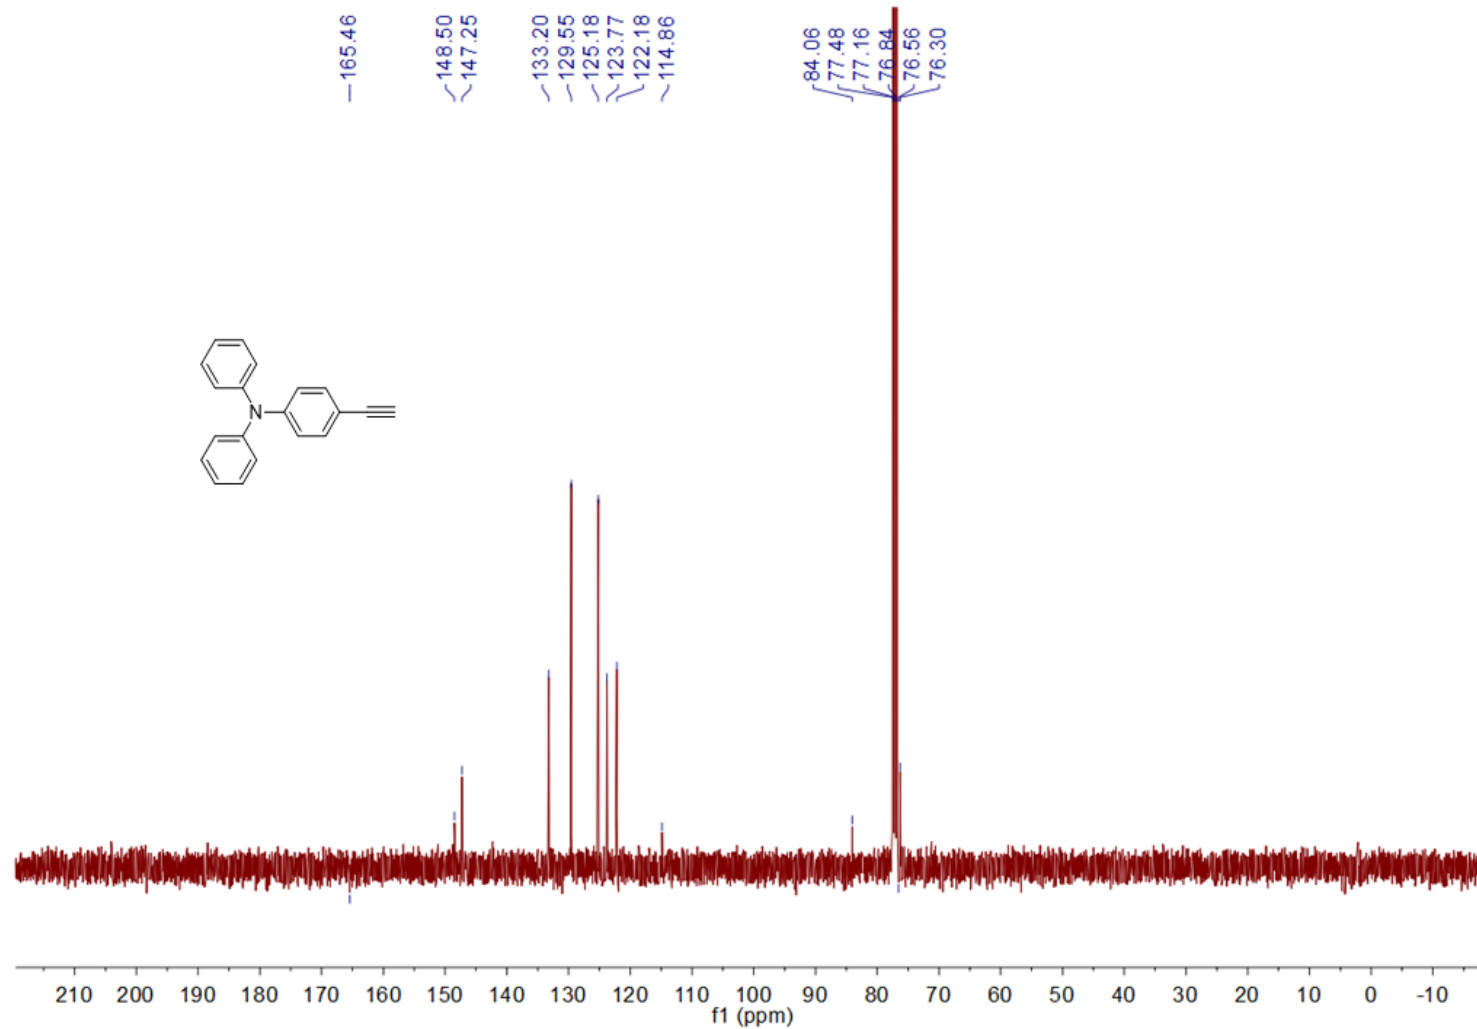

**Figure S25.**  $^{13}\text{C}\{^1\text{H}\}$  NMR spectrum of **9** (101 MHz,  $\text{CDCl}_3$ ).

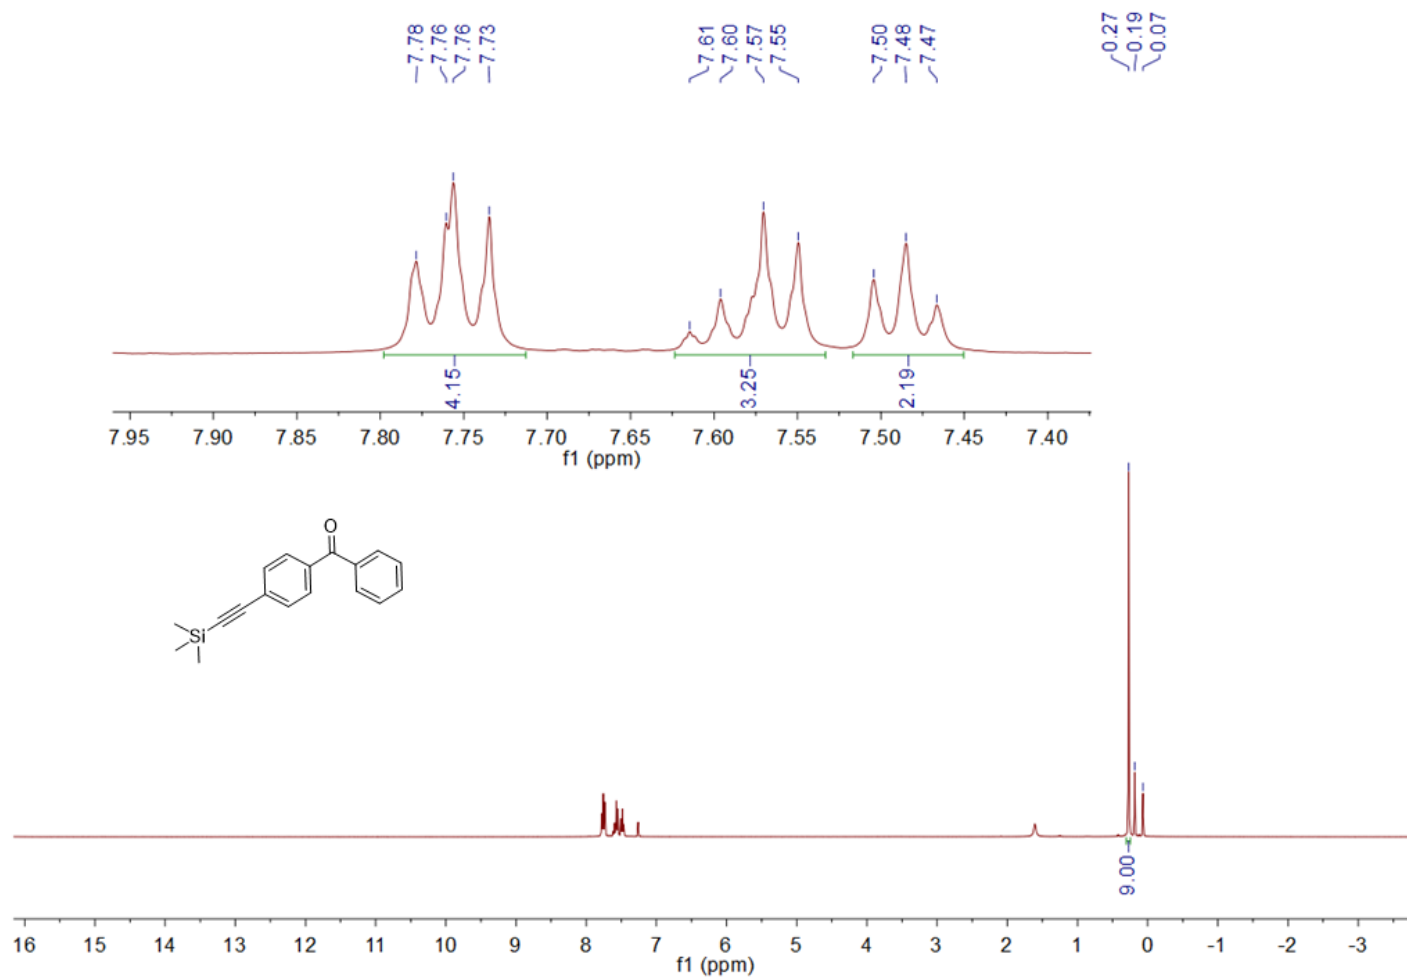

**Figure S26.**  $^1\text{H}$  NMR spectrum of **10** (400 MHz,  $\text{CDCl}_3$ ).

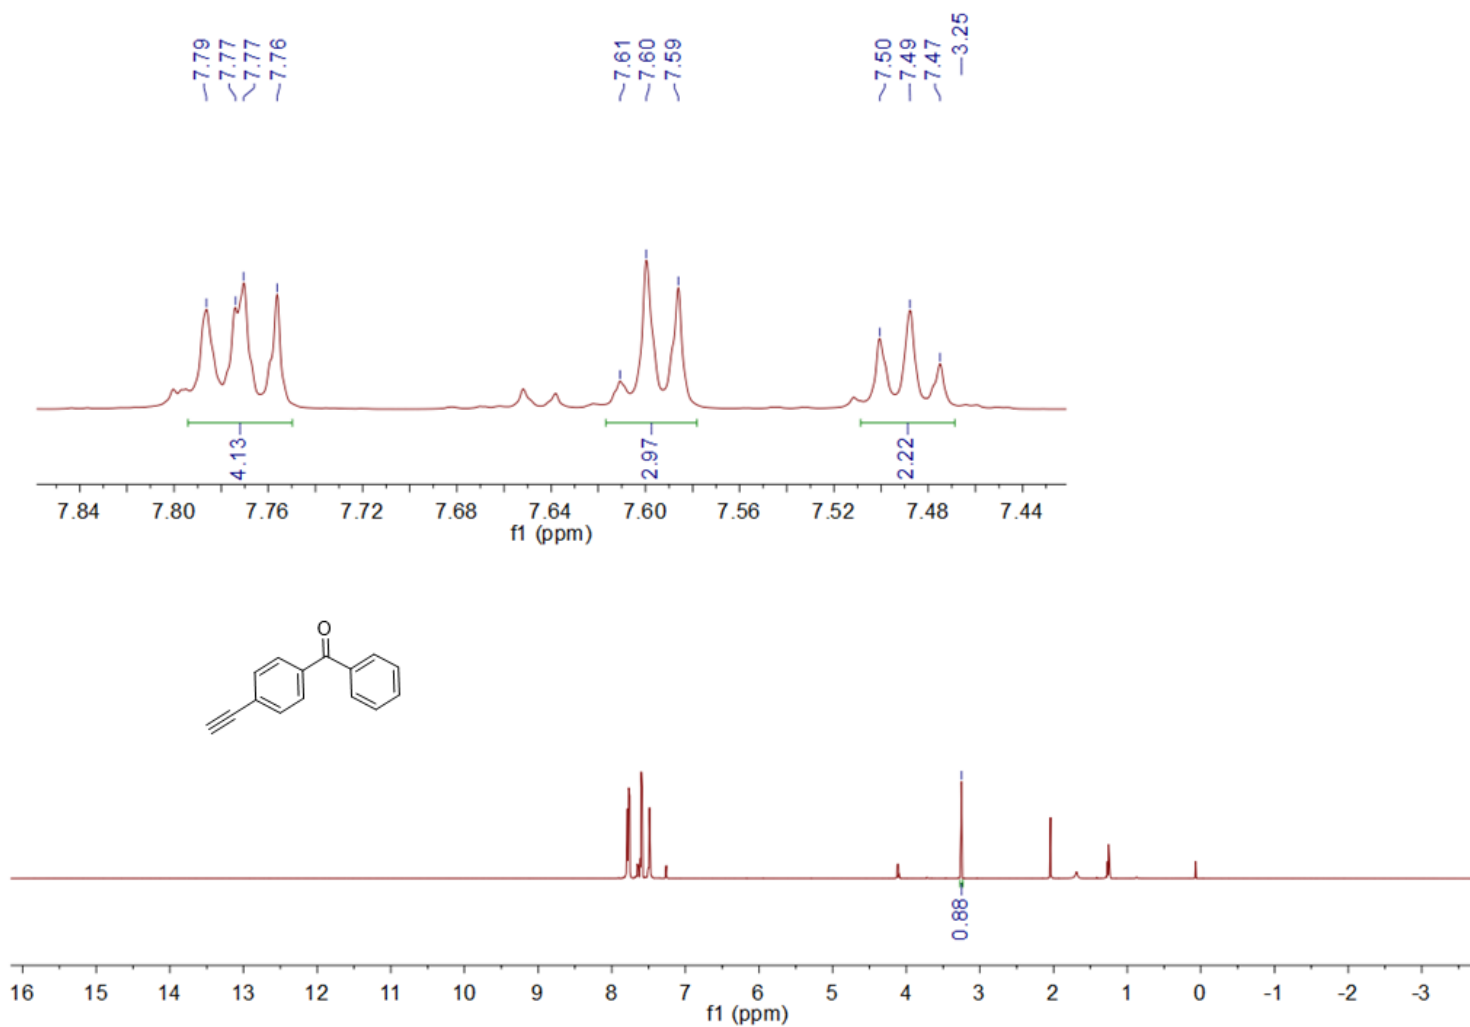

**Figure S27.** <sup>1</sup>H NMR spectrum of **11** (600 MHz, CDCl<sub>3</sub>).

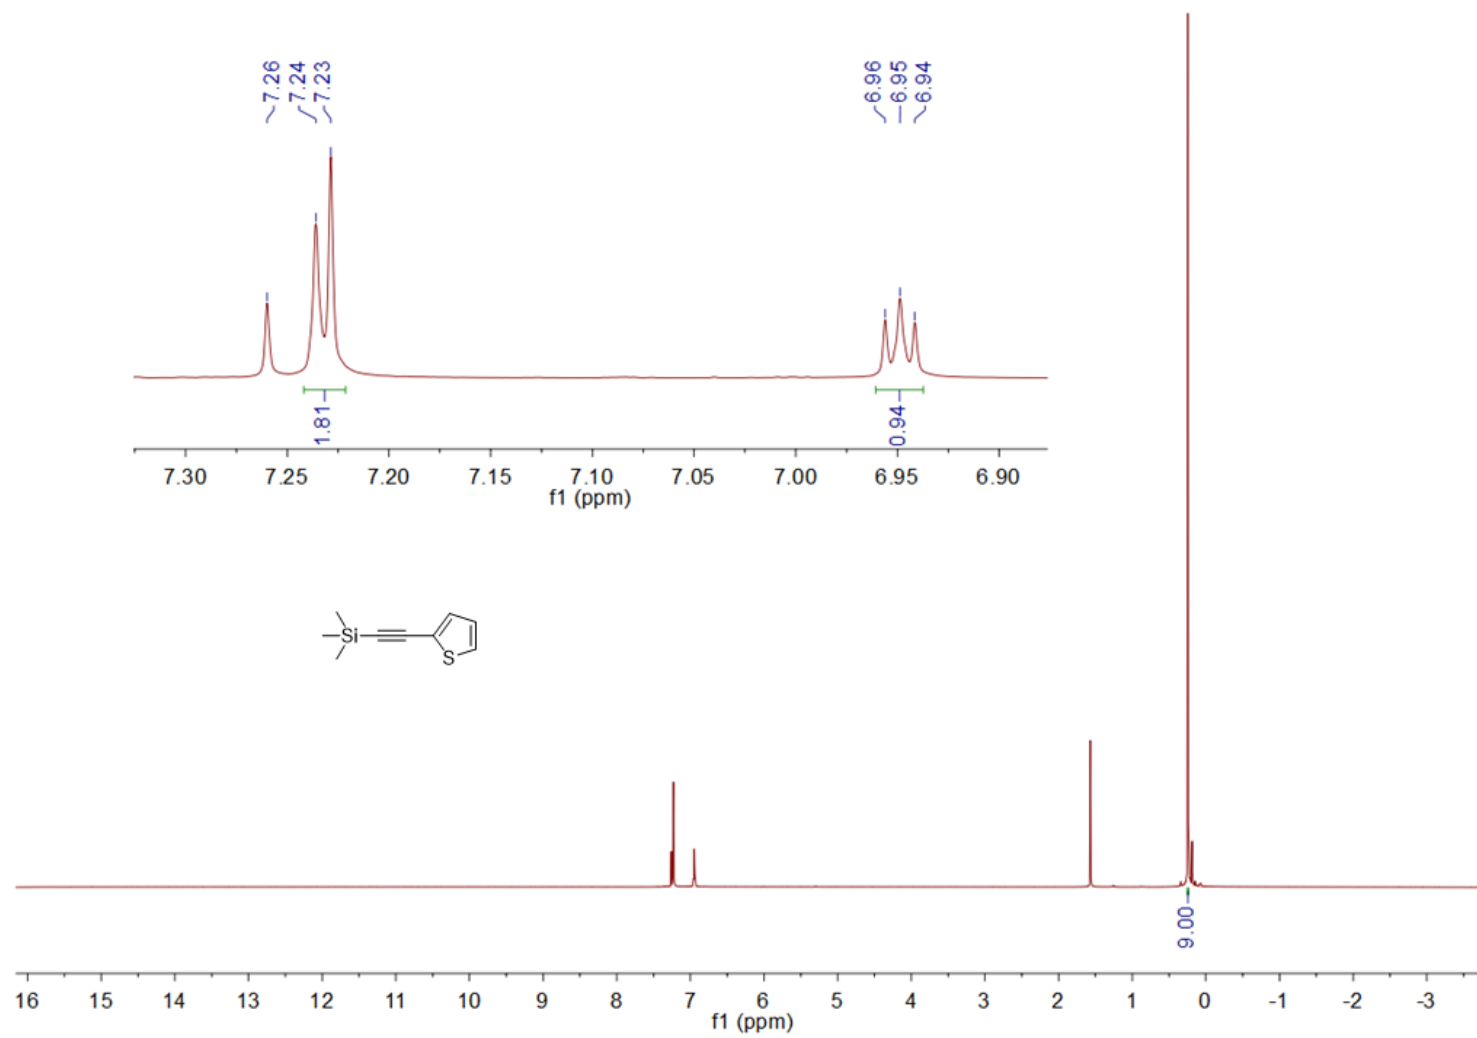

**Figure S28.**  $^1\text{H}$  NMR spectrum of **12** (600 MHz,  $\text{CDCl}_3$ ).

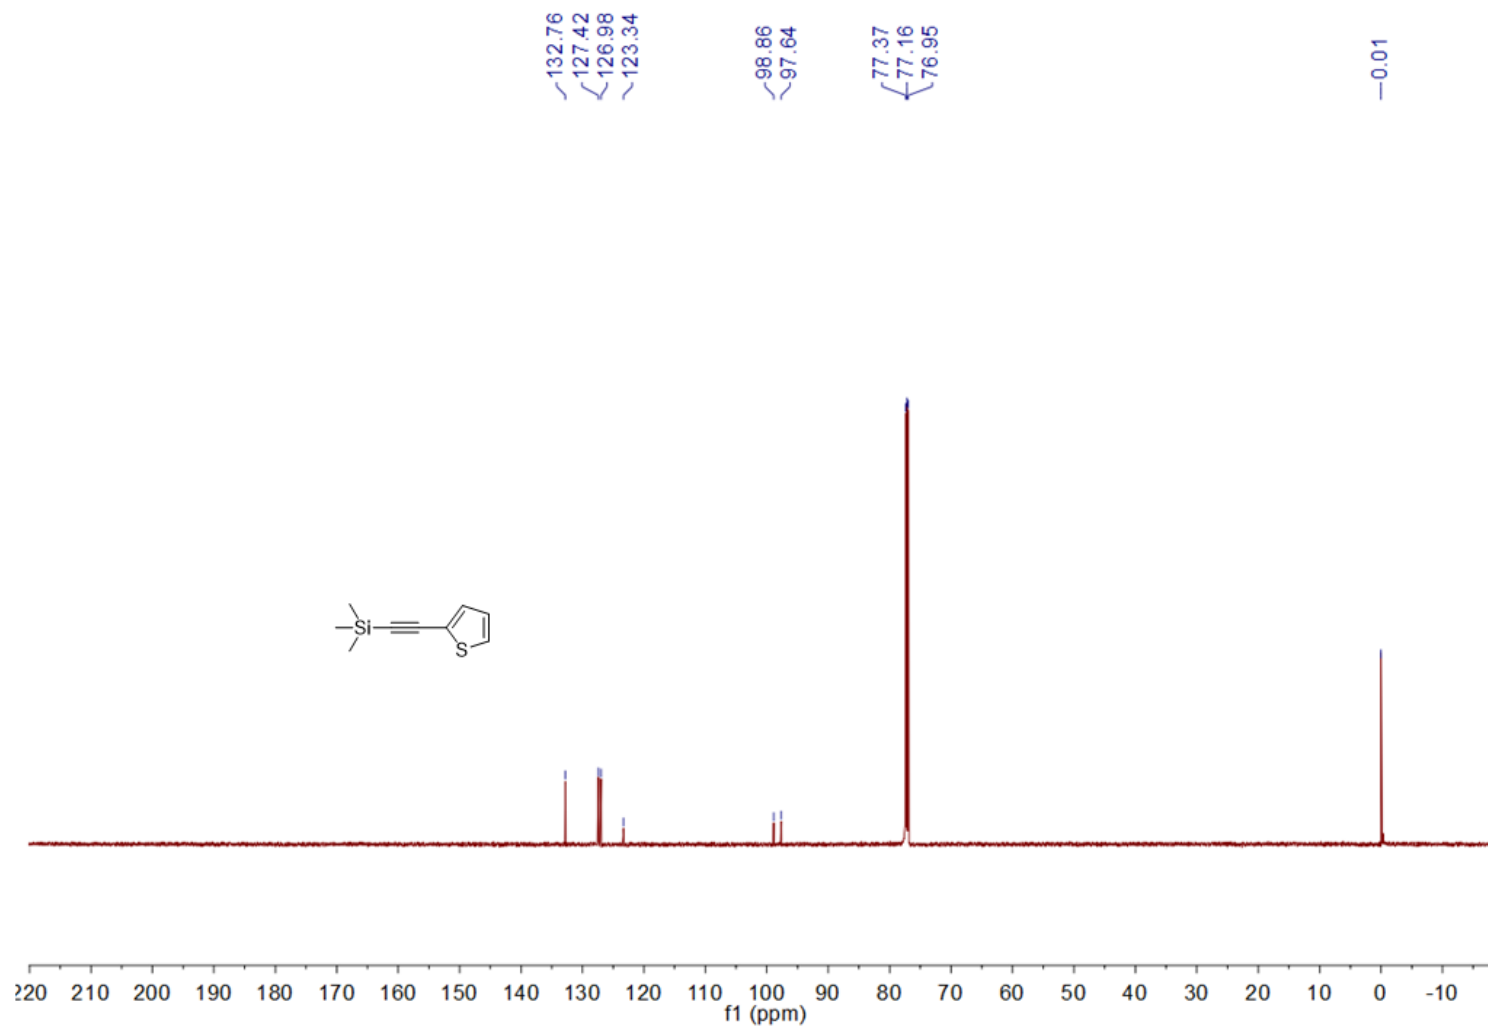

**Figure S29.** <sup>13</sup>C{<sup>1</sup>H} NMR spectrum of **12** (151 MHz, CDCl<sub>3</sub>).



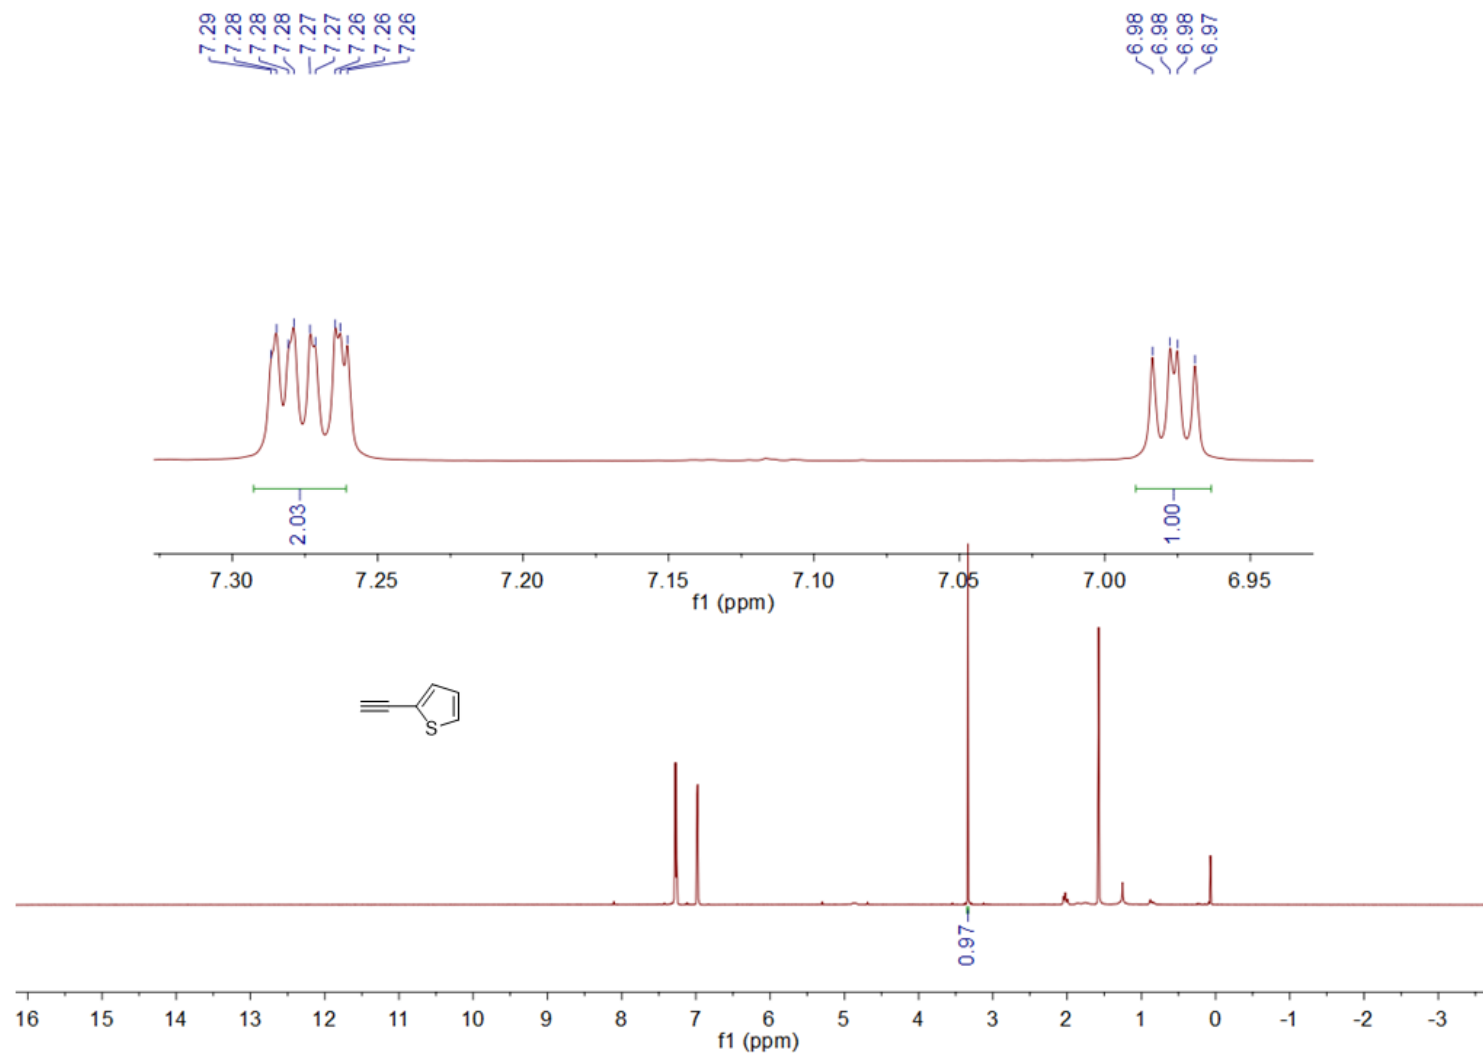

**Figure S30.**  $^1\text{H}$  NMR spectrum of **13** (600 MHz,  $\text{CDCl}_3$ ).

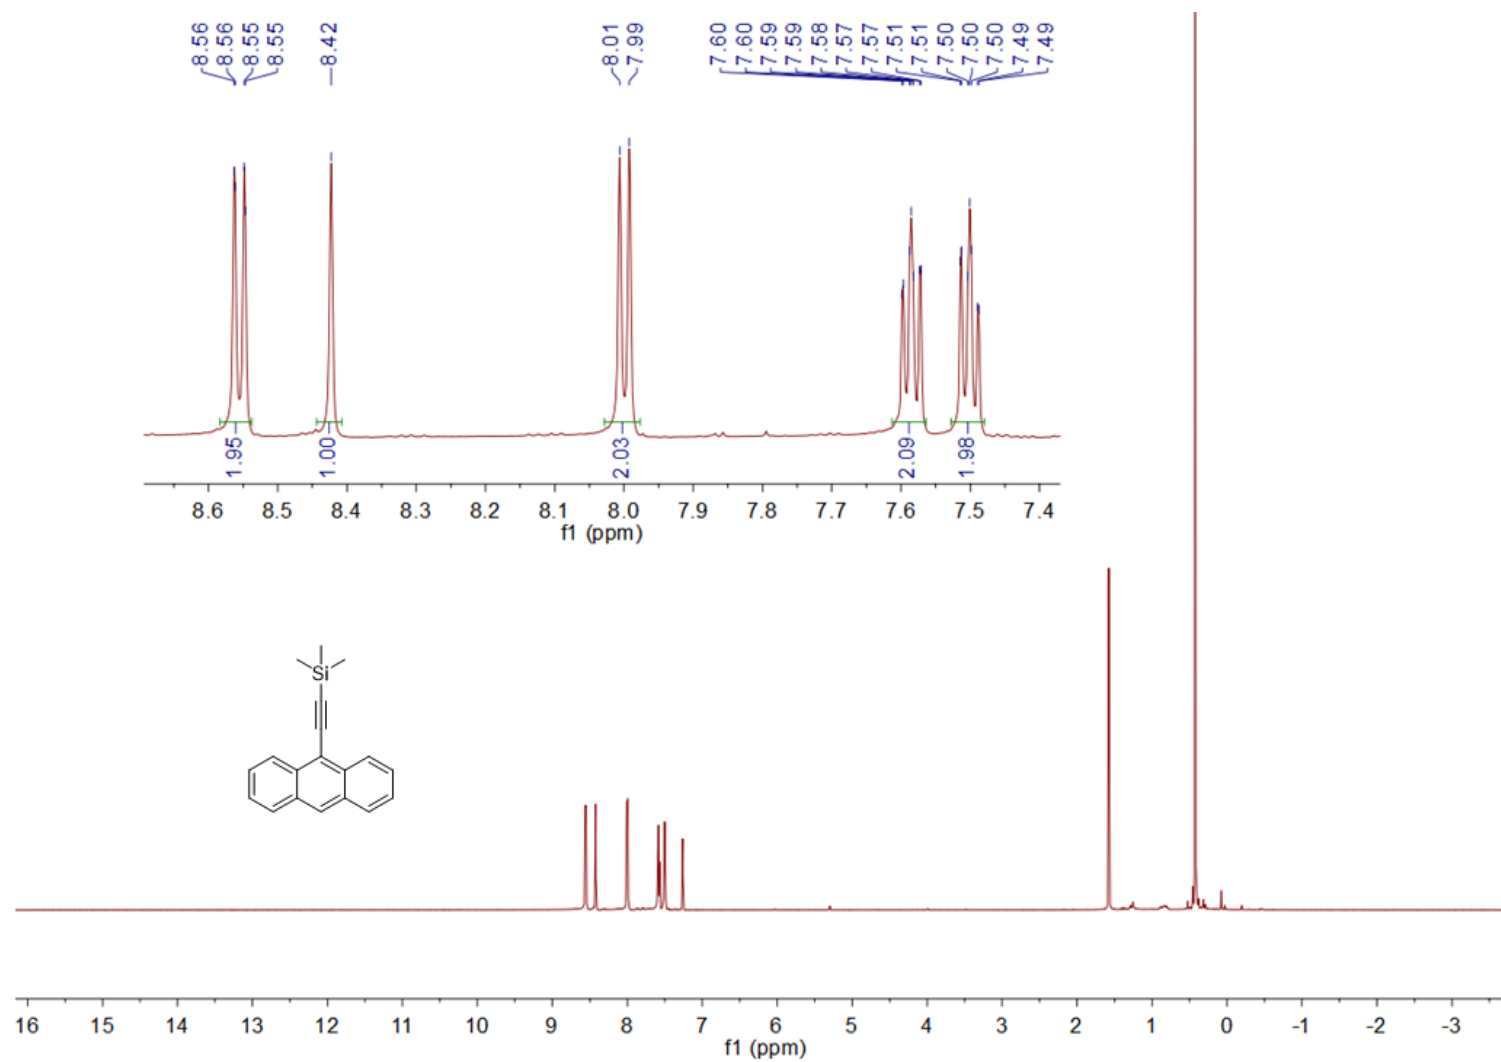

**Figure S31.** <sup>1</sup>H NMR spectrum of **14** (600 MHz, CDCl<sub>3</sub>).

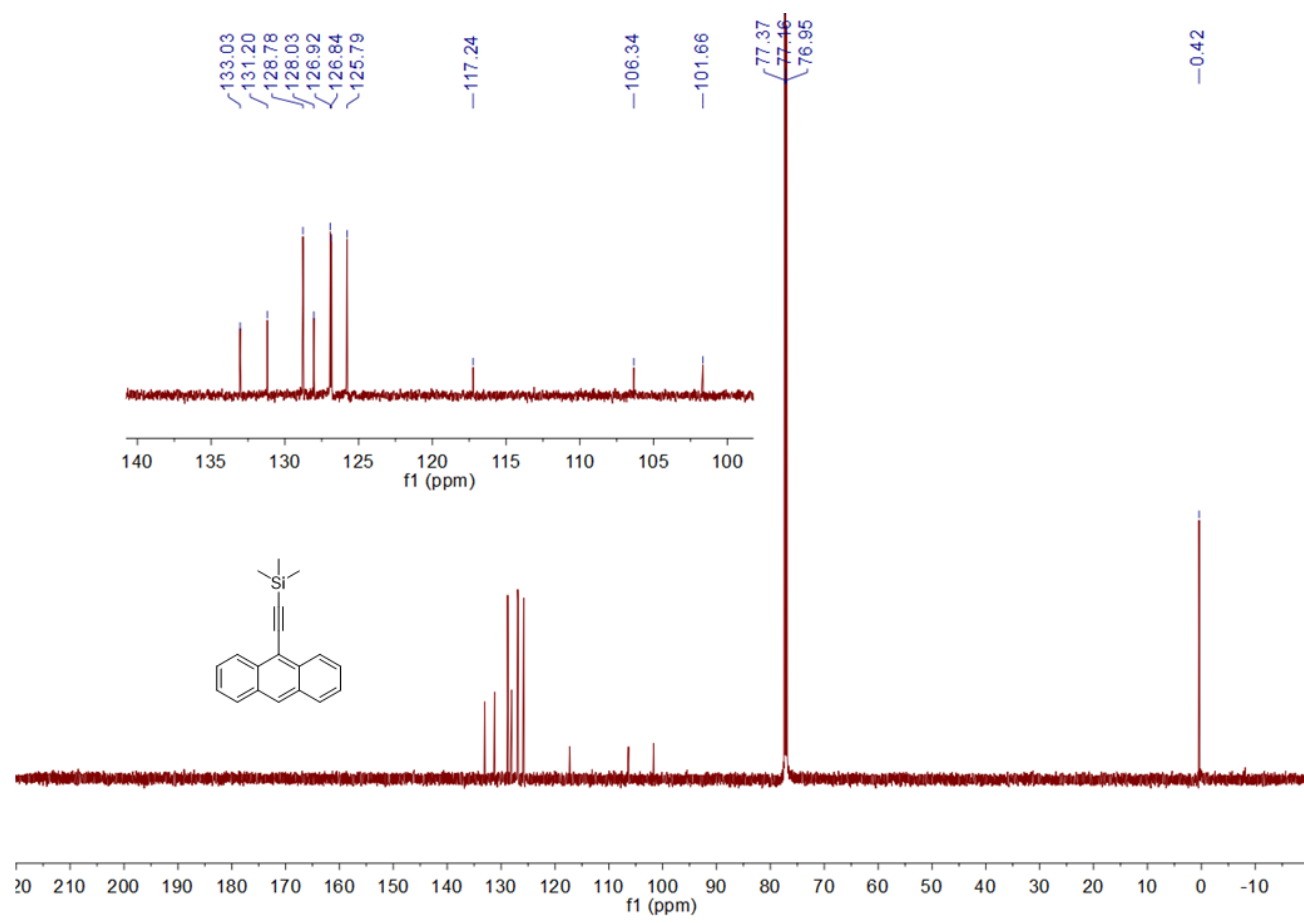

**Figure S32.**  $^{13}\text{C}\{^1\text{H}\}$  NMR spectrum of **14** (151 MHz,  $\text{CDCl}_3$ ).

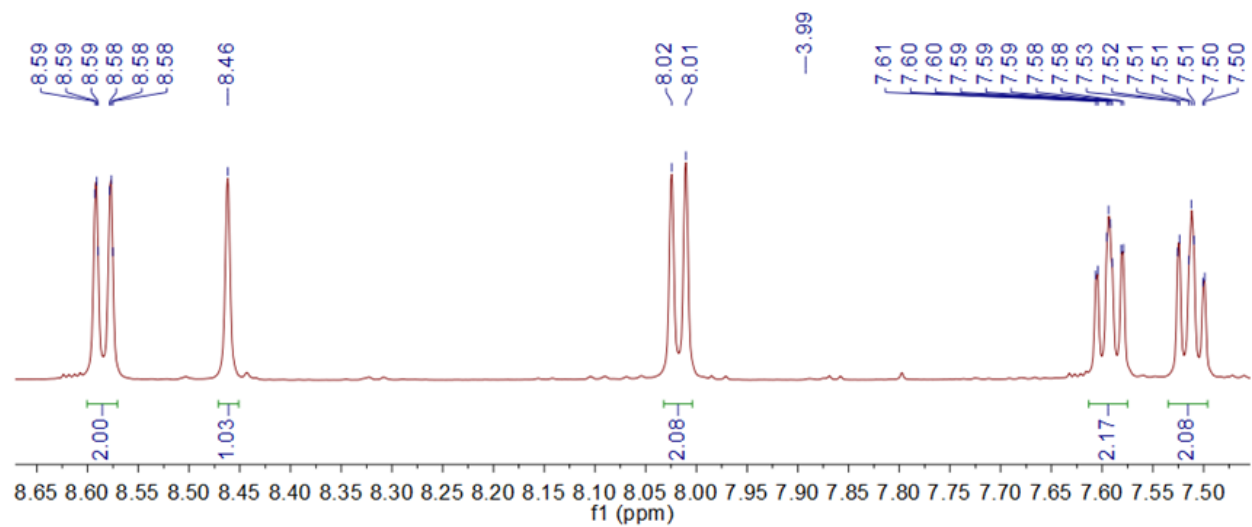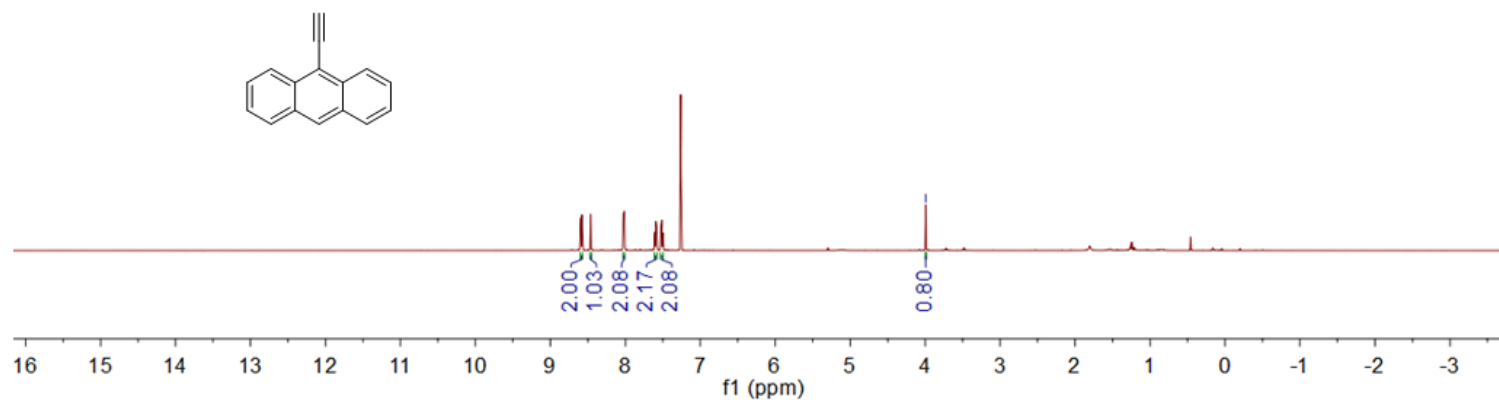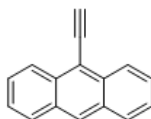

Figure S33. <sup>1</sup>H NMR spectrum of **15** (600 MHz, CDCl<sub>3</sub>).

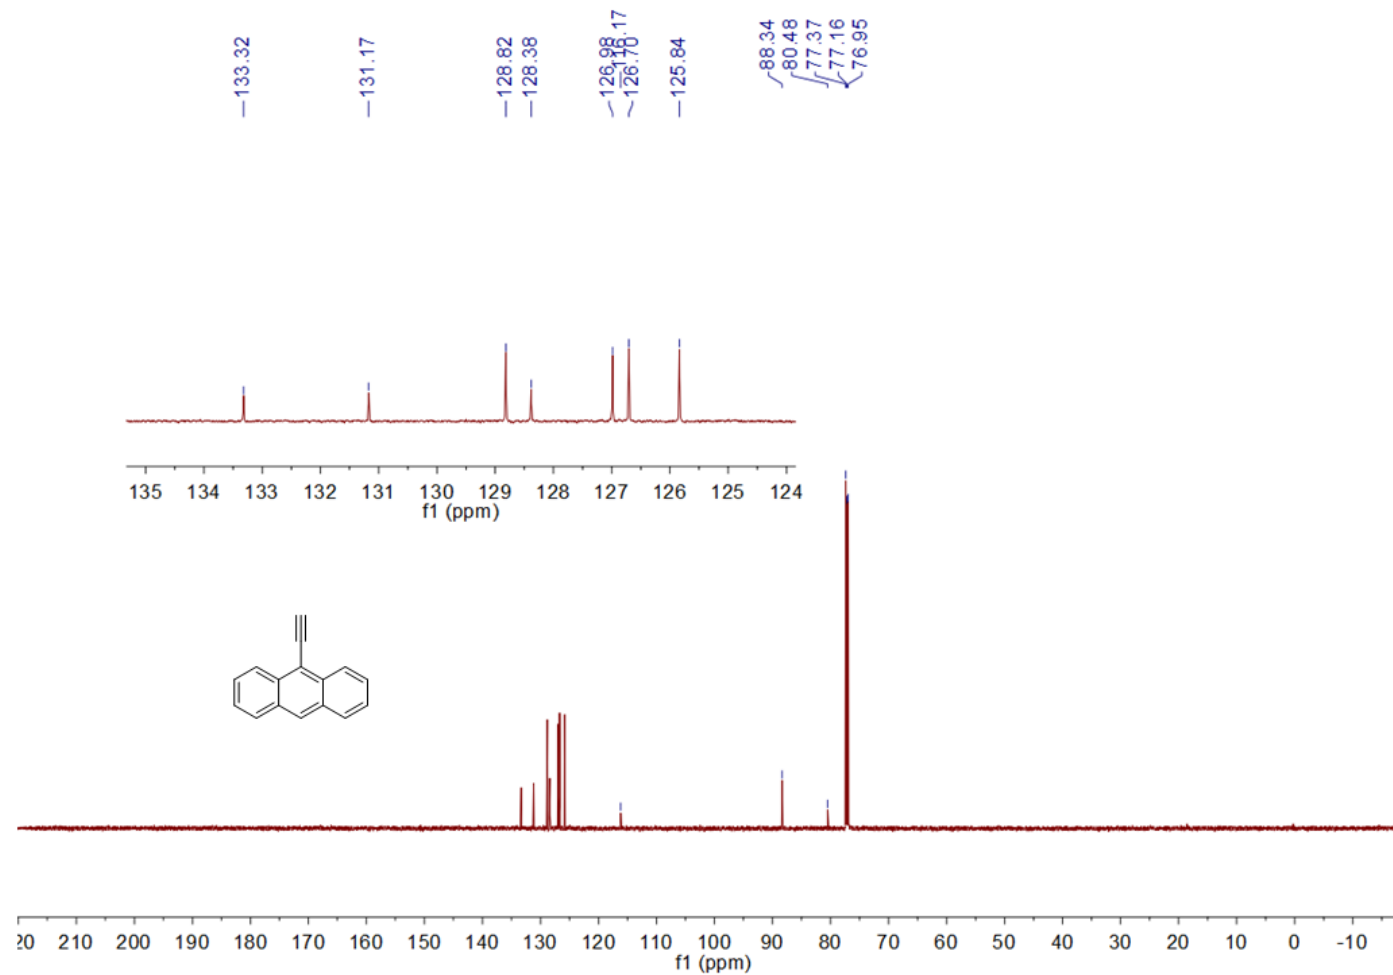

**Figure S34.**  $^{13}\text{C}\{^1\text{H}\}$  NMR spectrum of **15** (151 MHz,  $\text{CDCl}_3$ ).

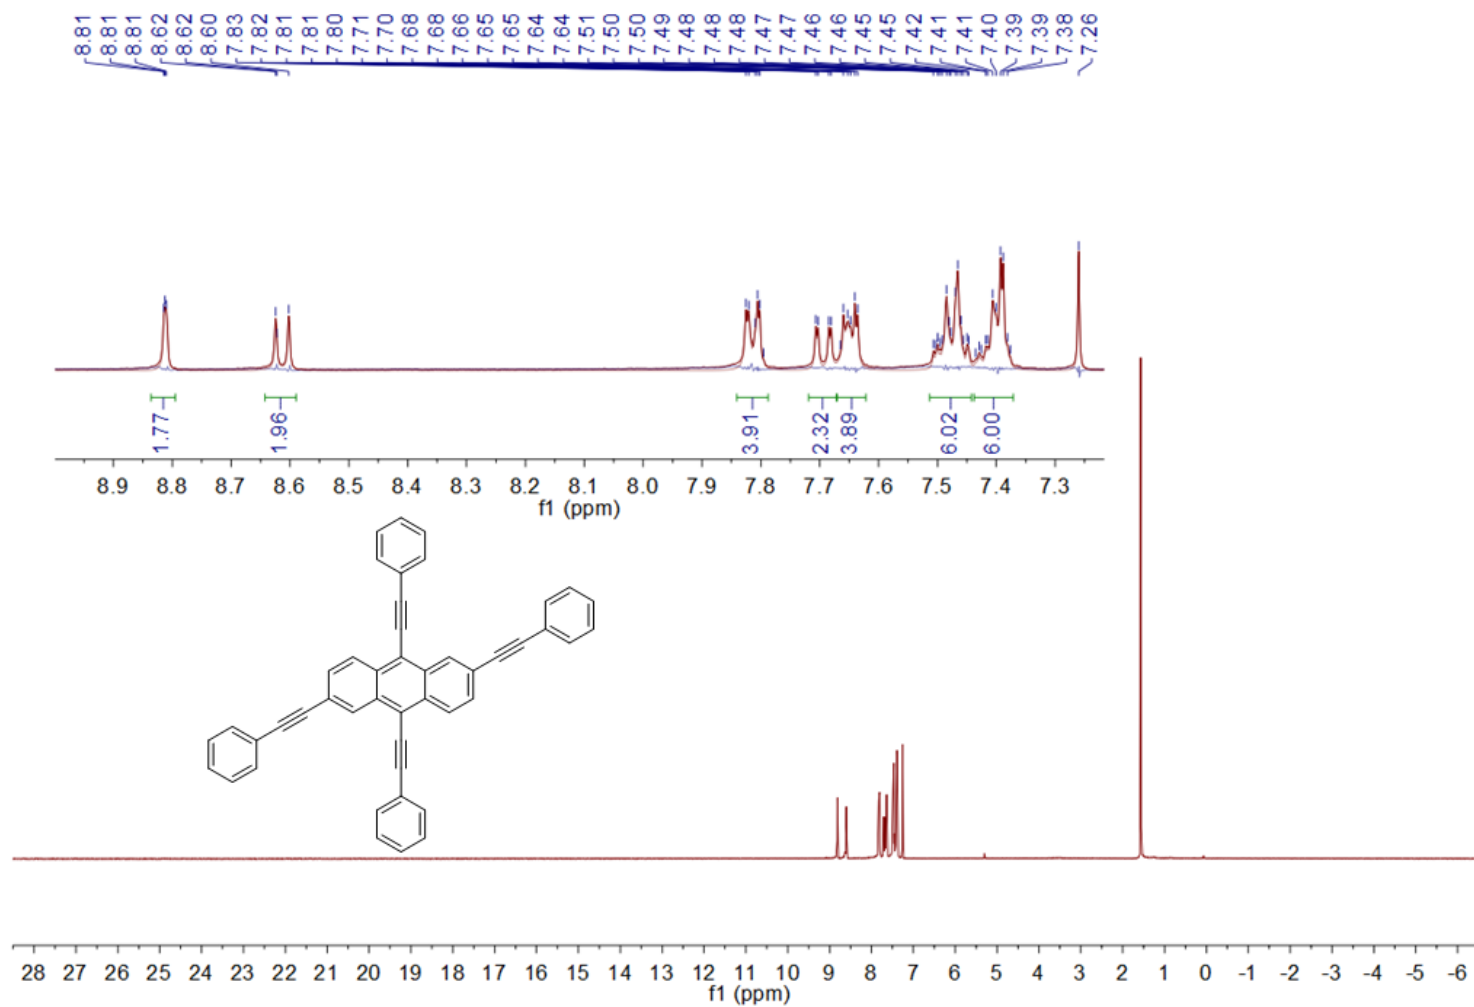

Figure S35. <sup>1</sup>H NMR spectrum of 6 (400 MHz, CDCl<sub>3</sub>).

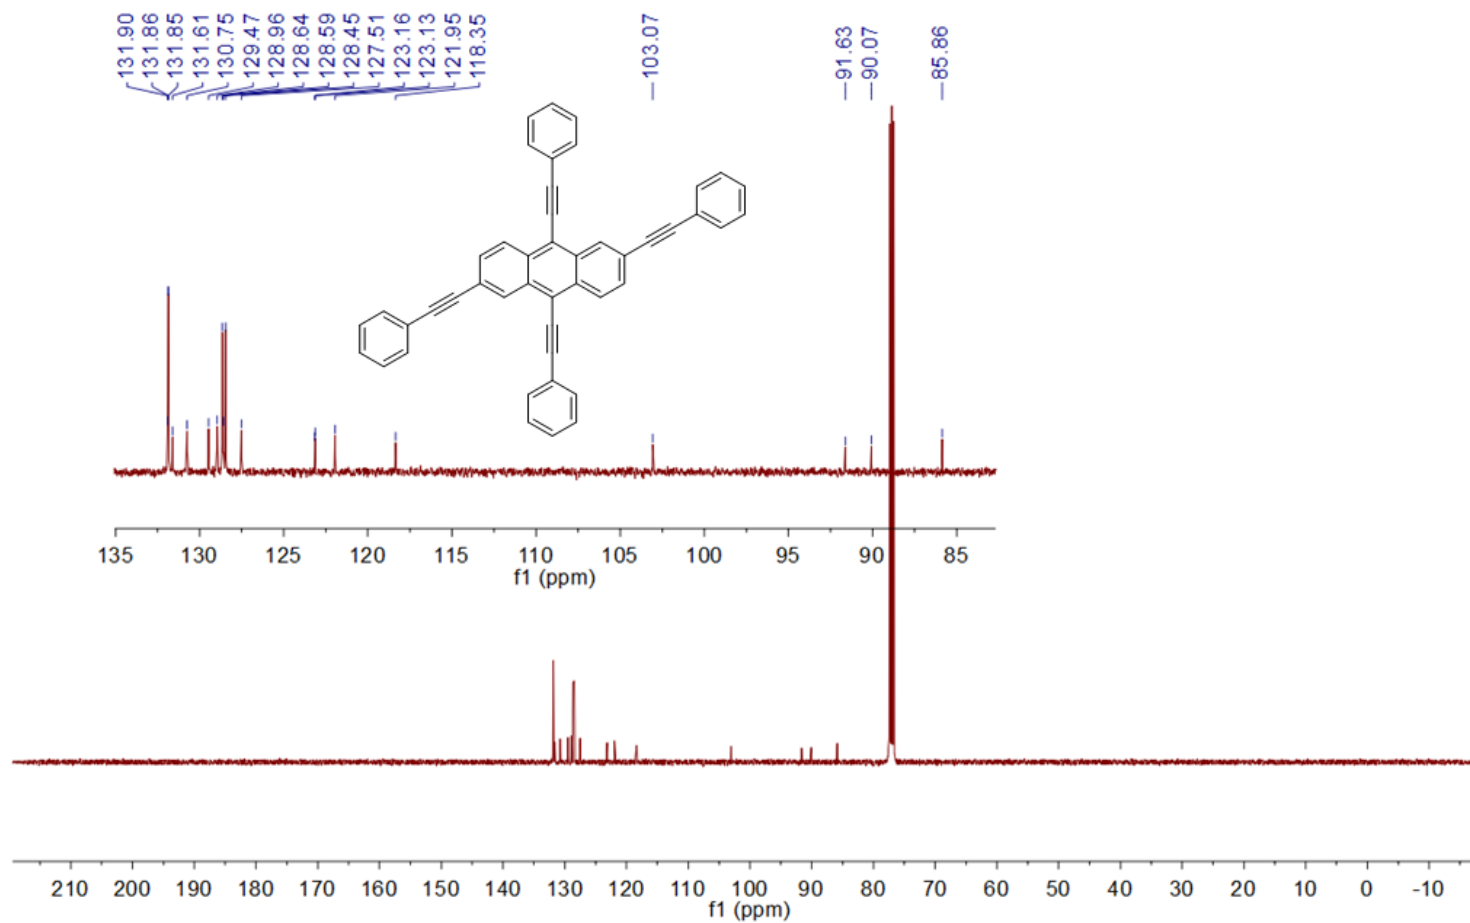

**Figure S36.**  $^{13}\text{C}\{^1\text{H}\}$  NMR spectrum of **6** (101 MHz,  $\text{CDCl}_3$ ).

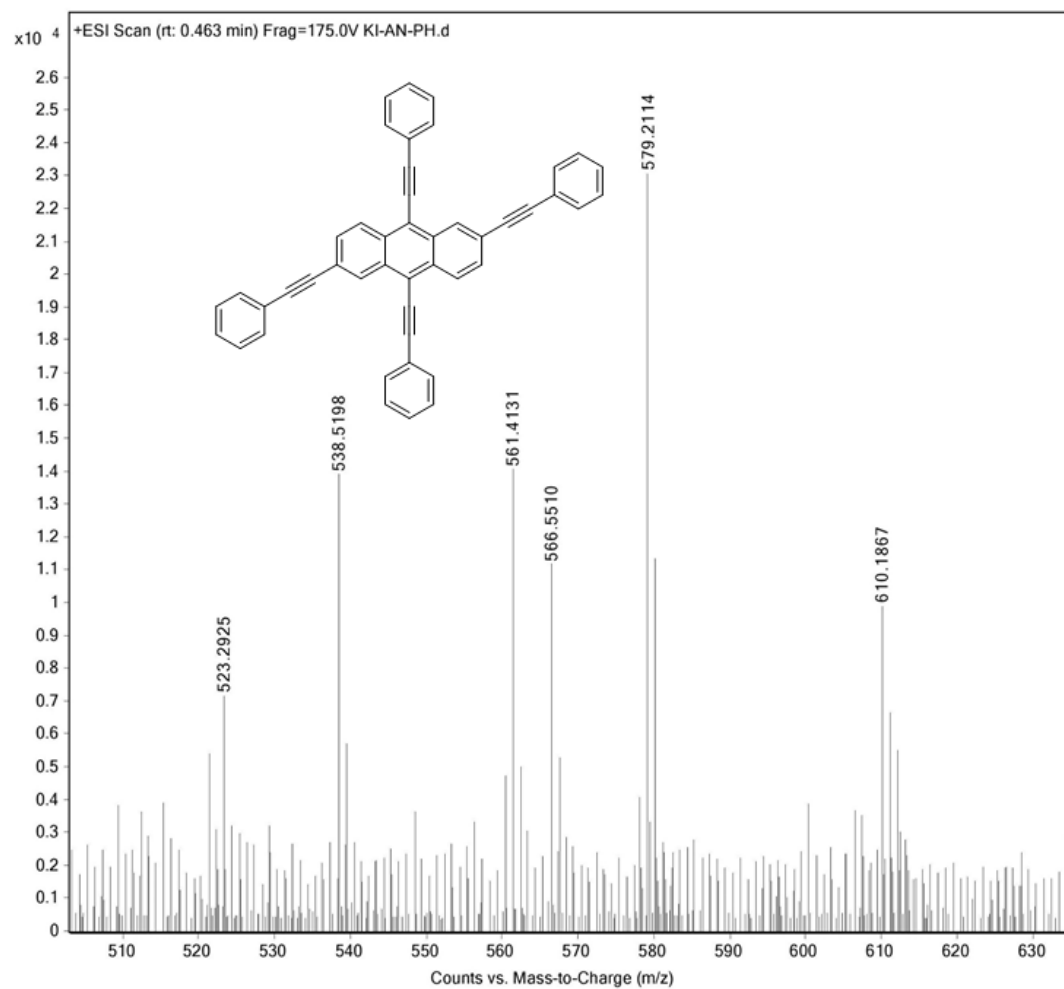

**Figure S37.** HRMS spectrum of **6**.



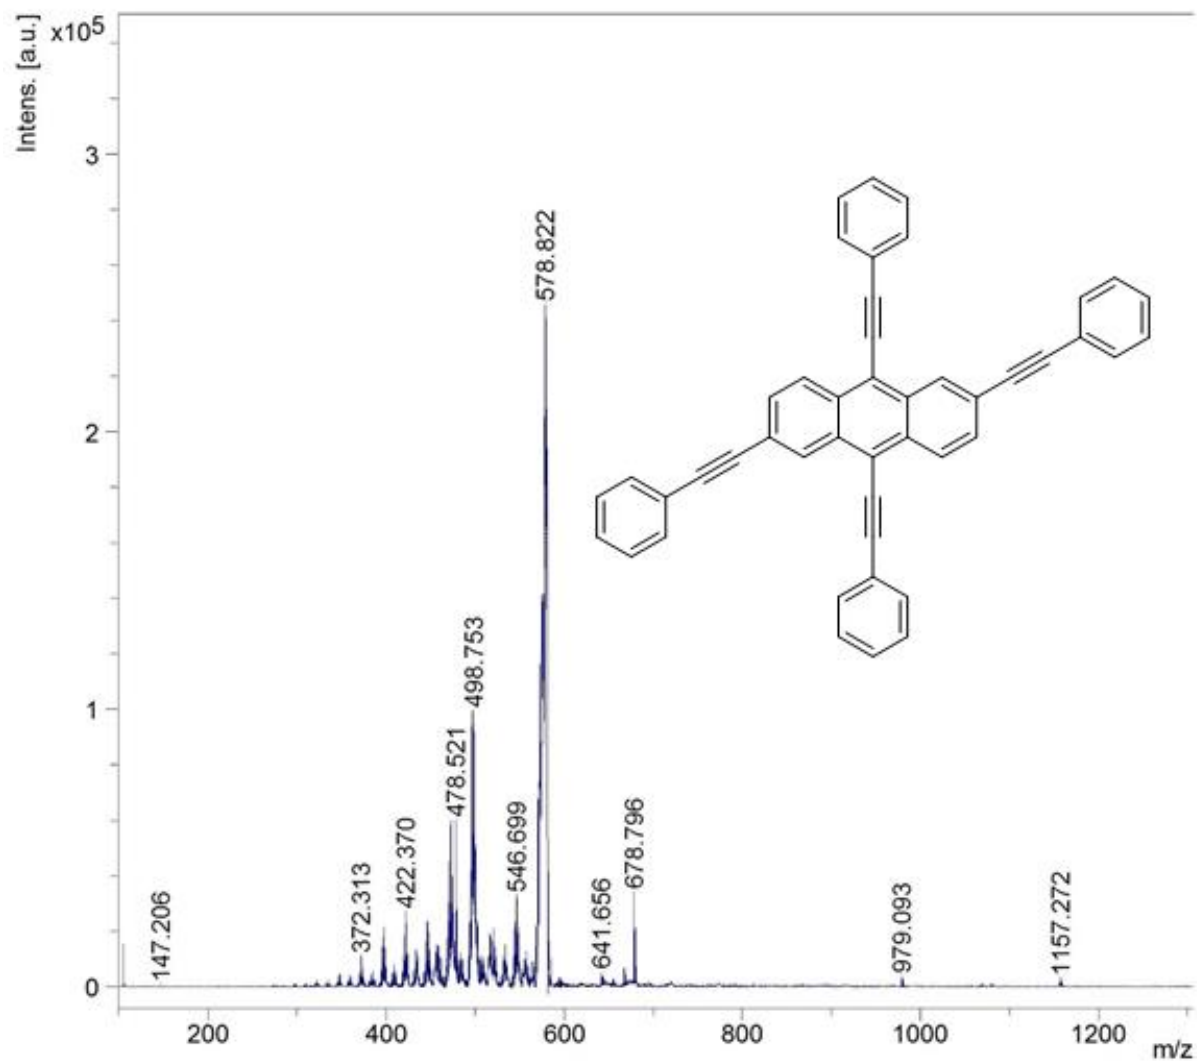

**Figure S38.** MALDI spectrum of **6**.

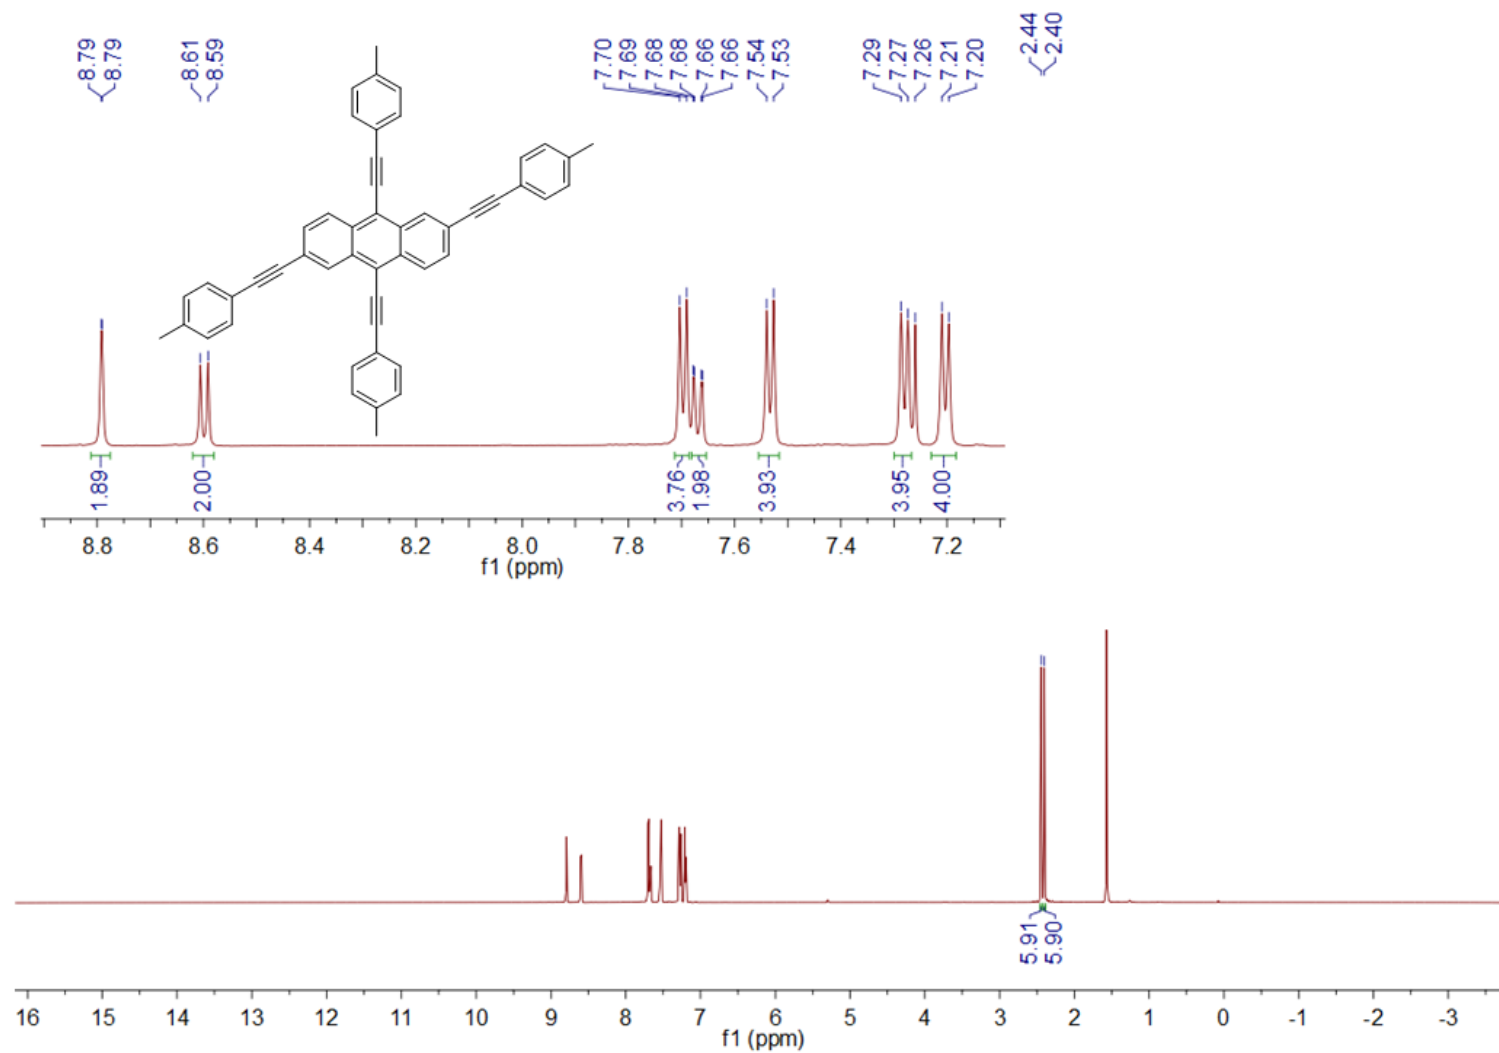

**Figure S39.**  $^1\text{H}$  NMR spectrum of **6a** (400 MHz,  $\text{CDCl}_3$ ).

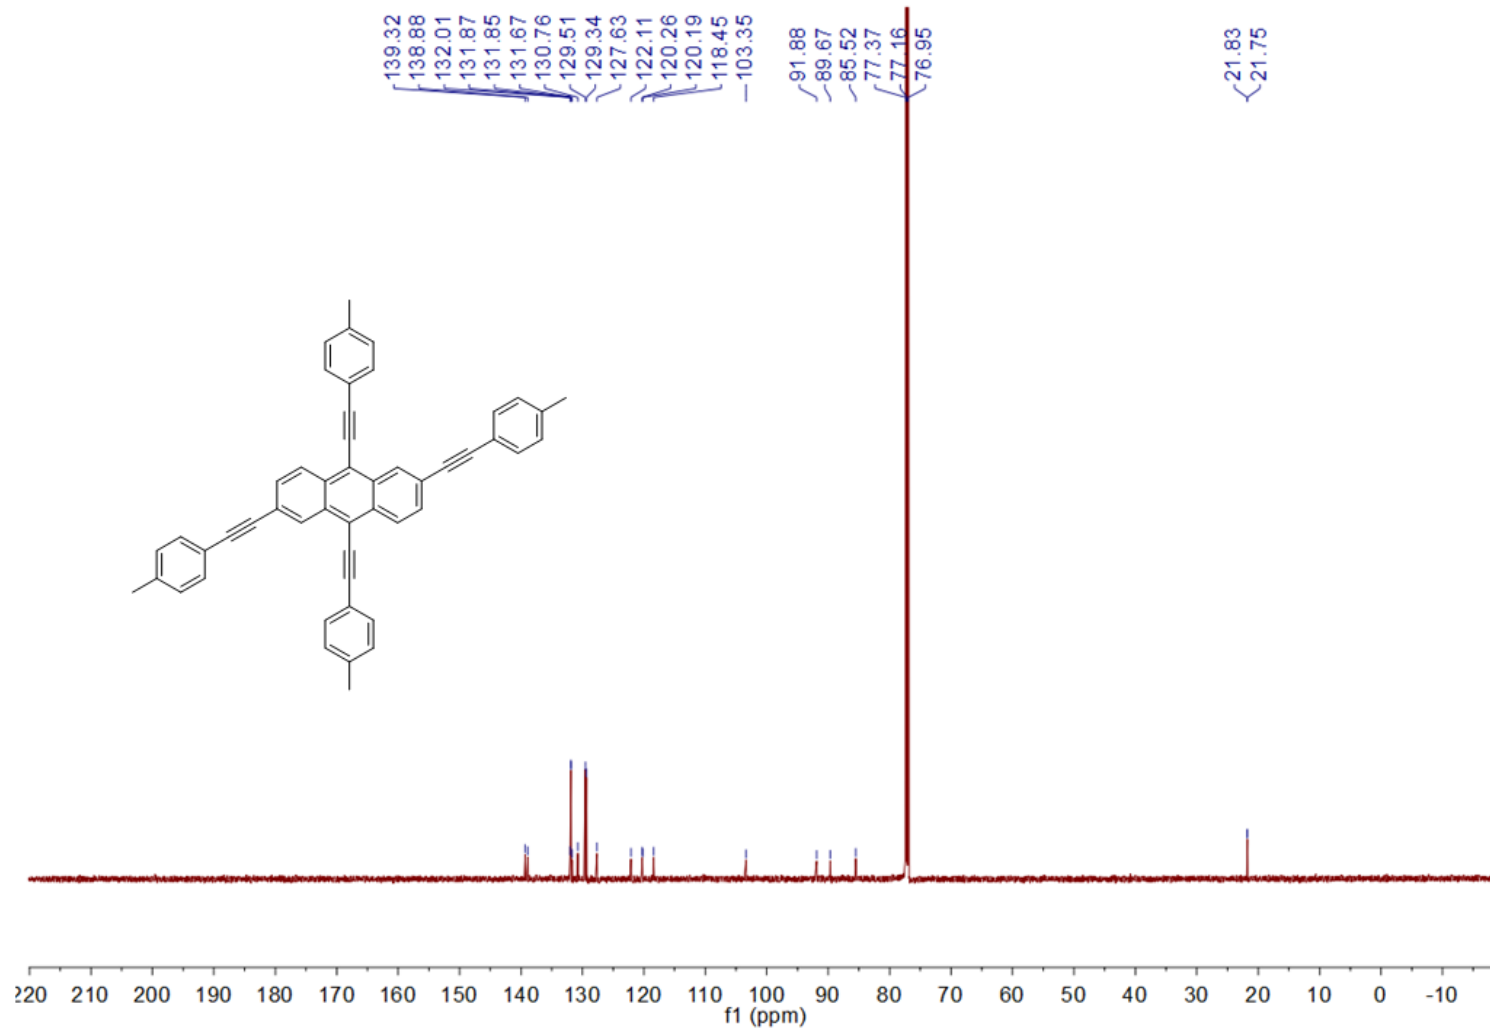

**Figure S40.**  $^{13}\text{C}\{^1\text{H}\}$  NMR spectrum of **6a** (151 MHz,  $\text{CDCl}_3$ ).

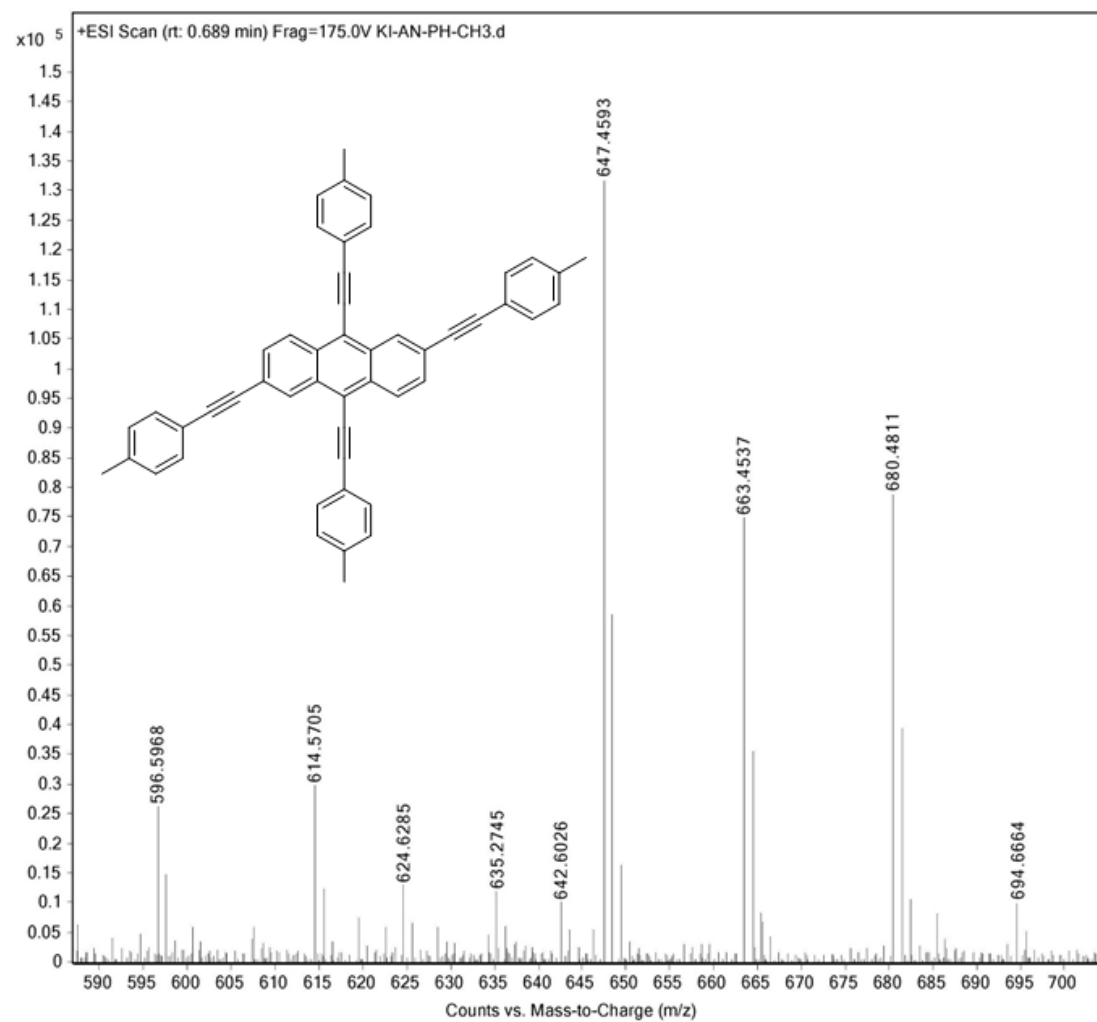

Figure S41. HRMS spectrum of 6a.

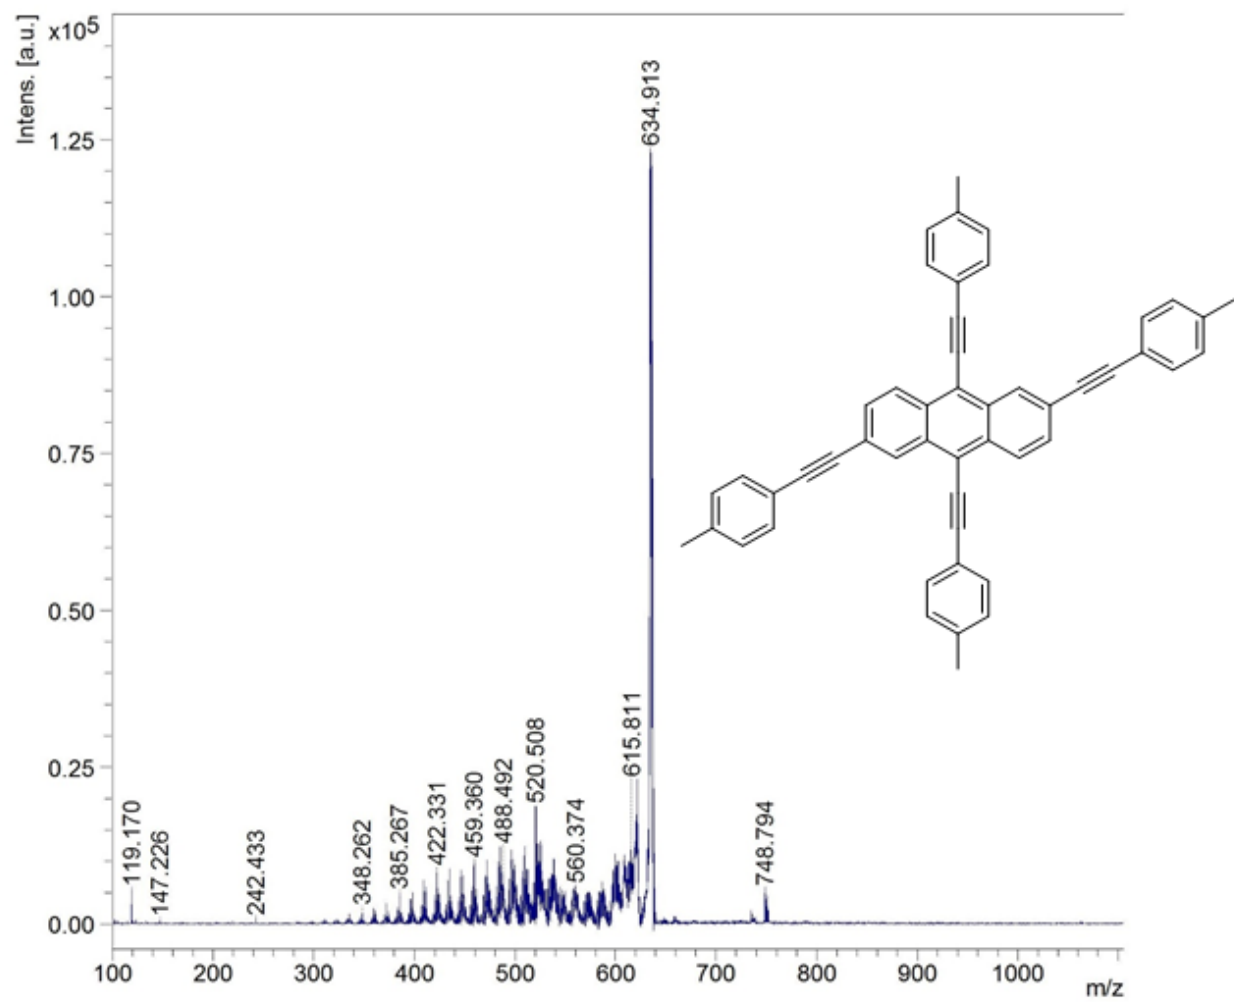

Figure S42. MALDI spectrum of 6a.

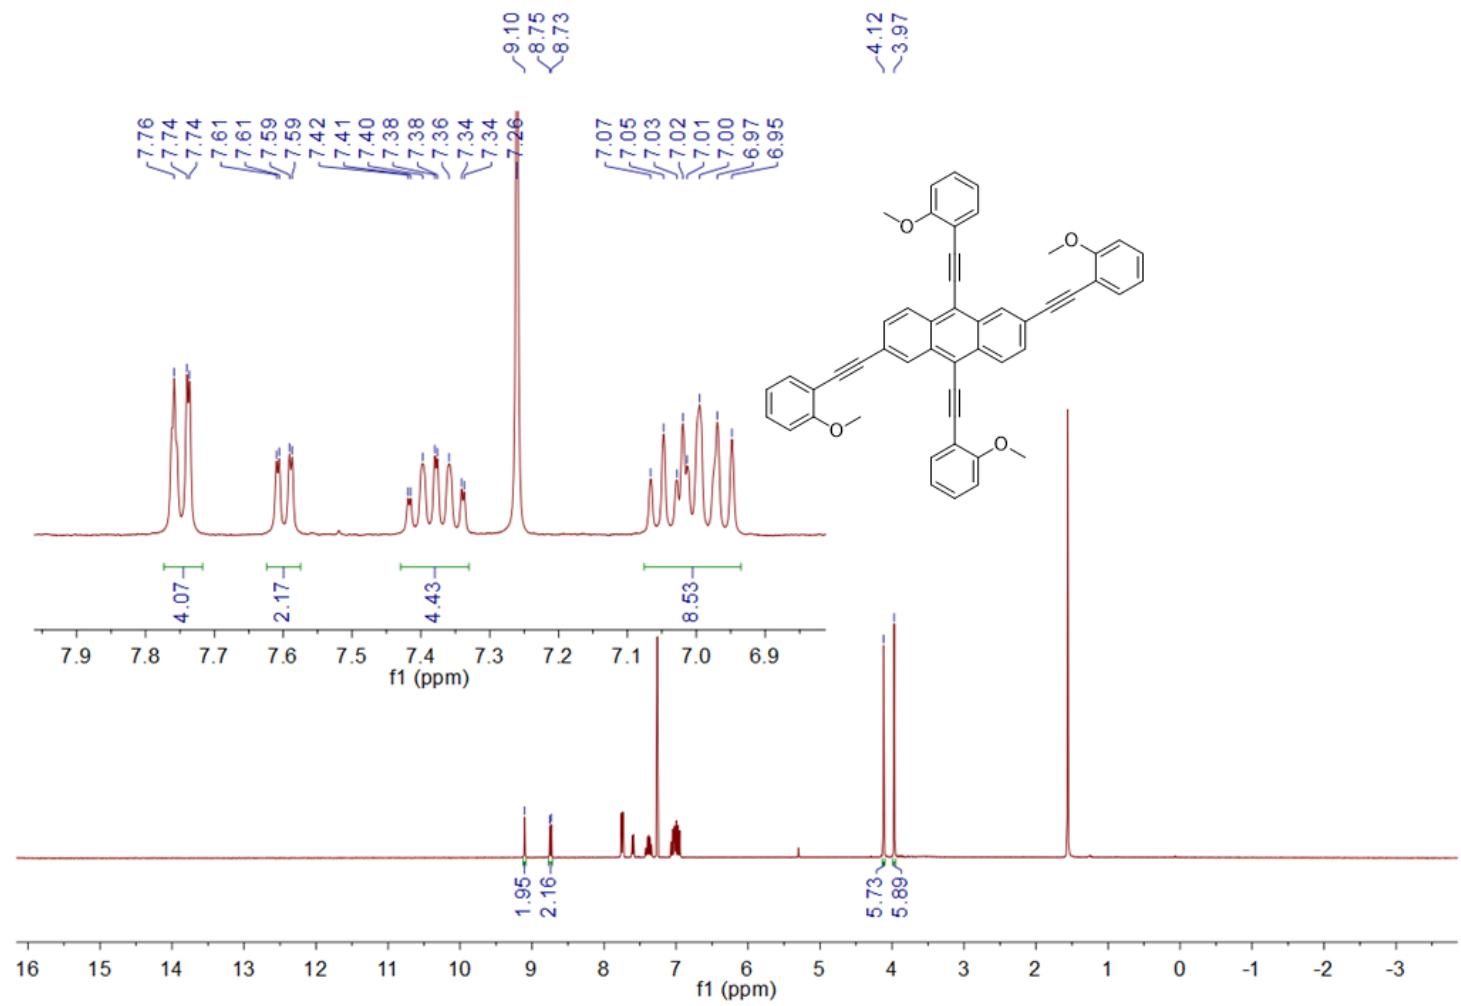

**Figure S43.**  $^1\text{H}$  NMR spectrum of **6b** (400 MHz,  $\text{CDCl}_3$ ).

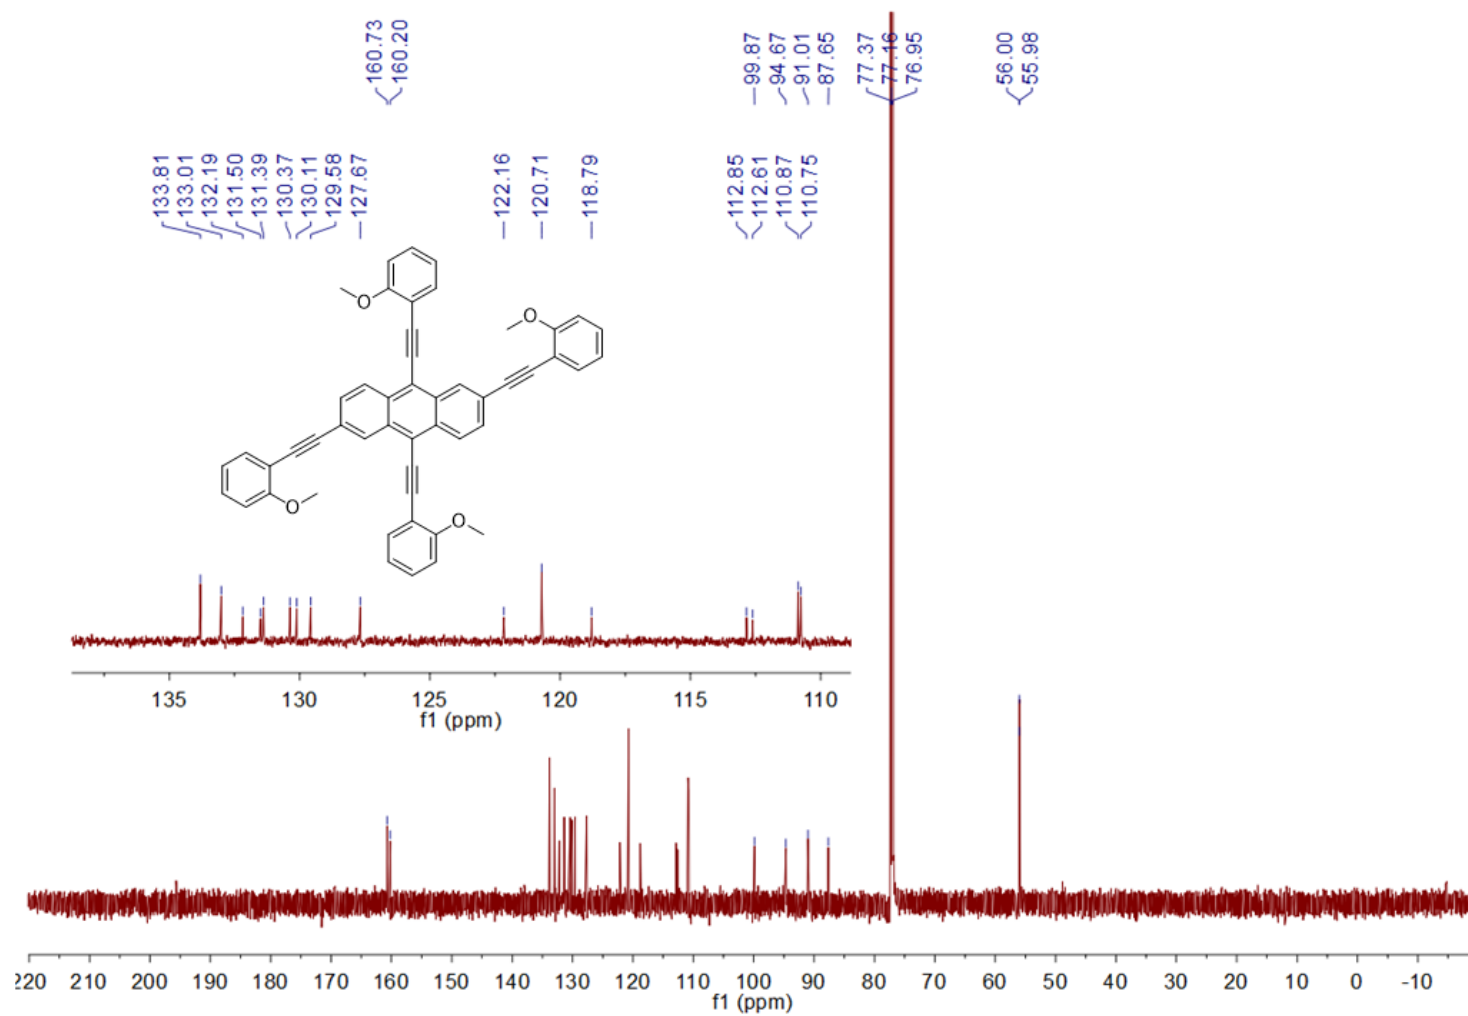

**Figure S44.**  $^{13}\text{C}\{^1\text{H}\}$  NMR spectrum of **6b** (151 MHz,  $\text{CDCl}_3$ ).





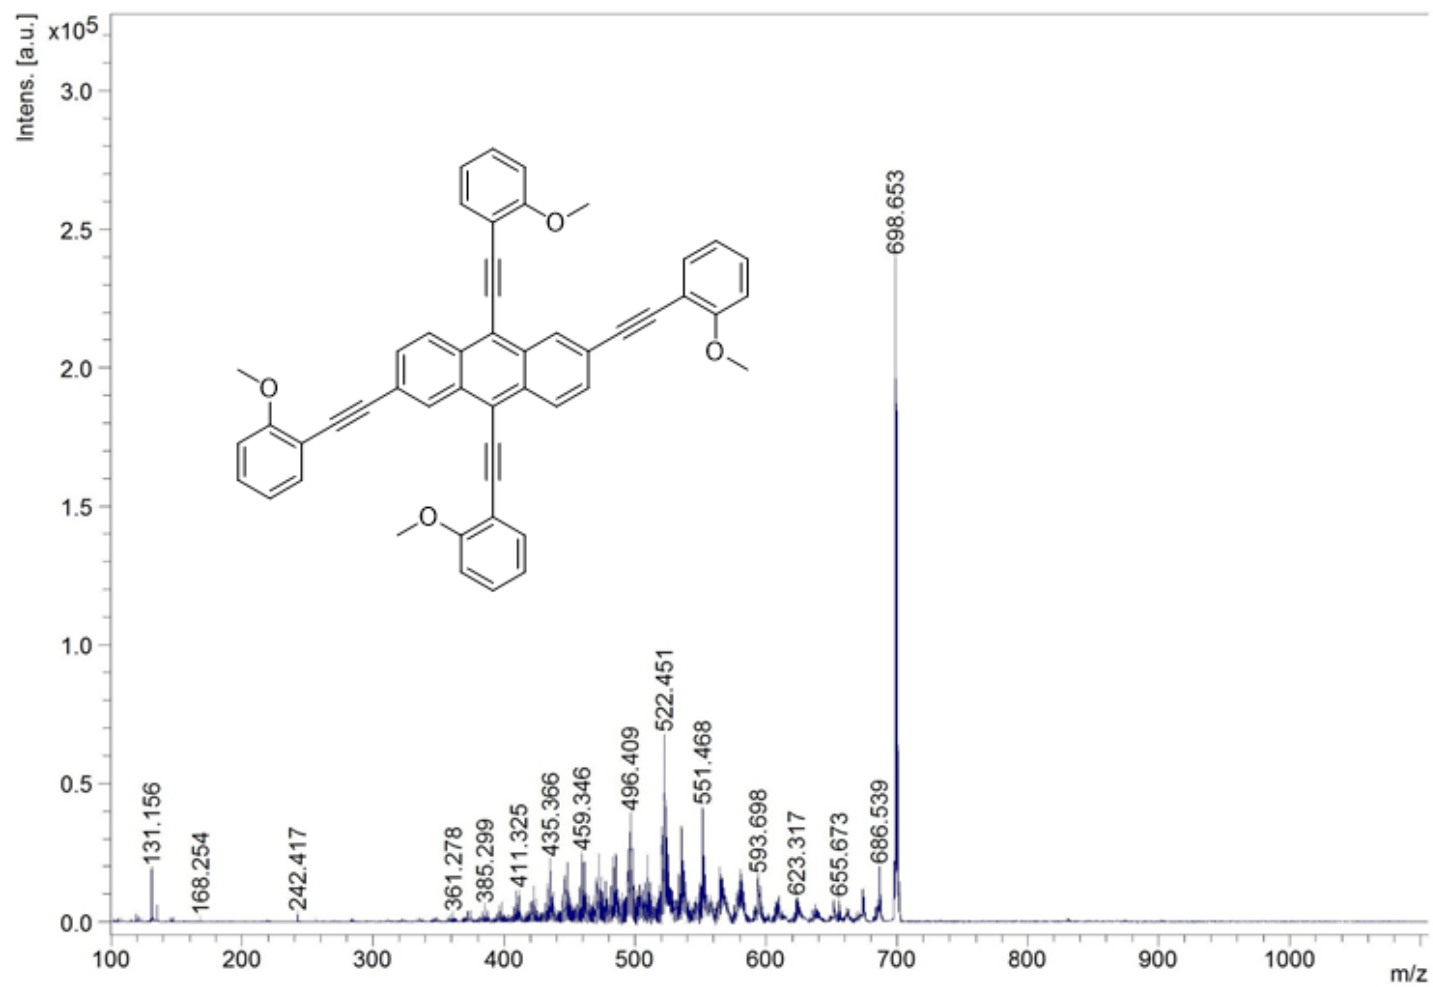

**Figure S46.** MALDI spectrum of **6b**.

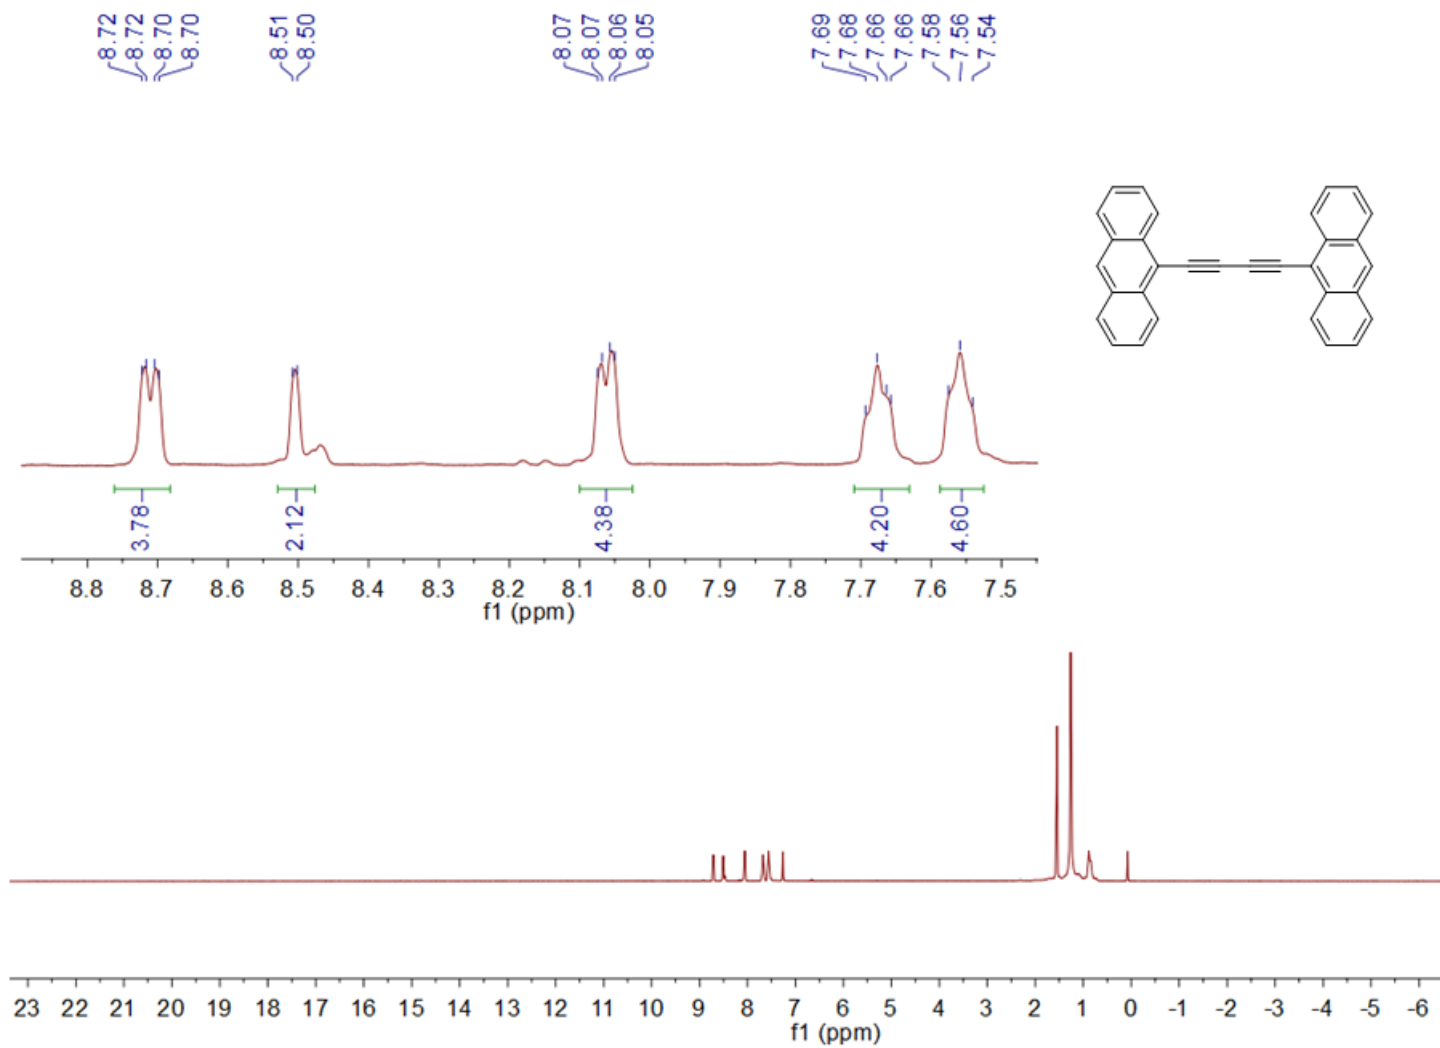

**Figure S47.**  $^1\text{H}$  NMR spectrum of **6c'** (500 MHz,  $\text{CDCl}_3$ ).

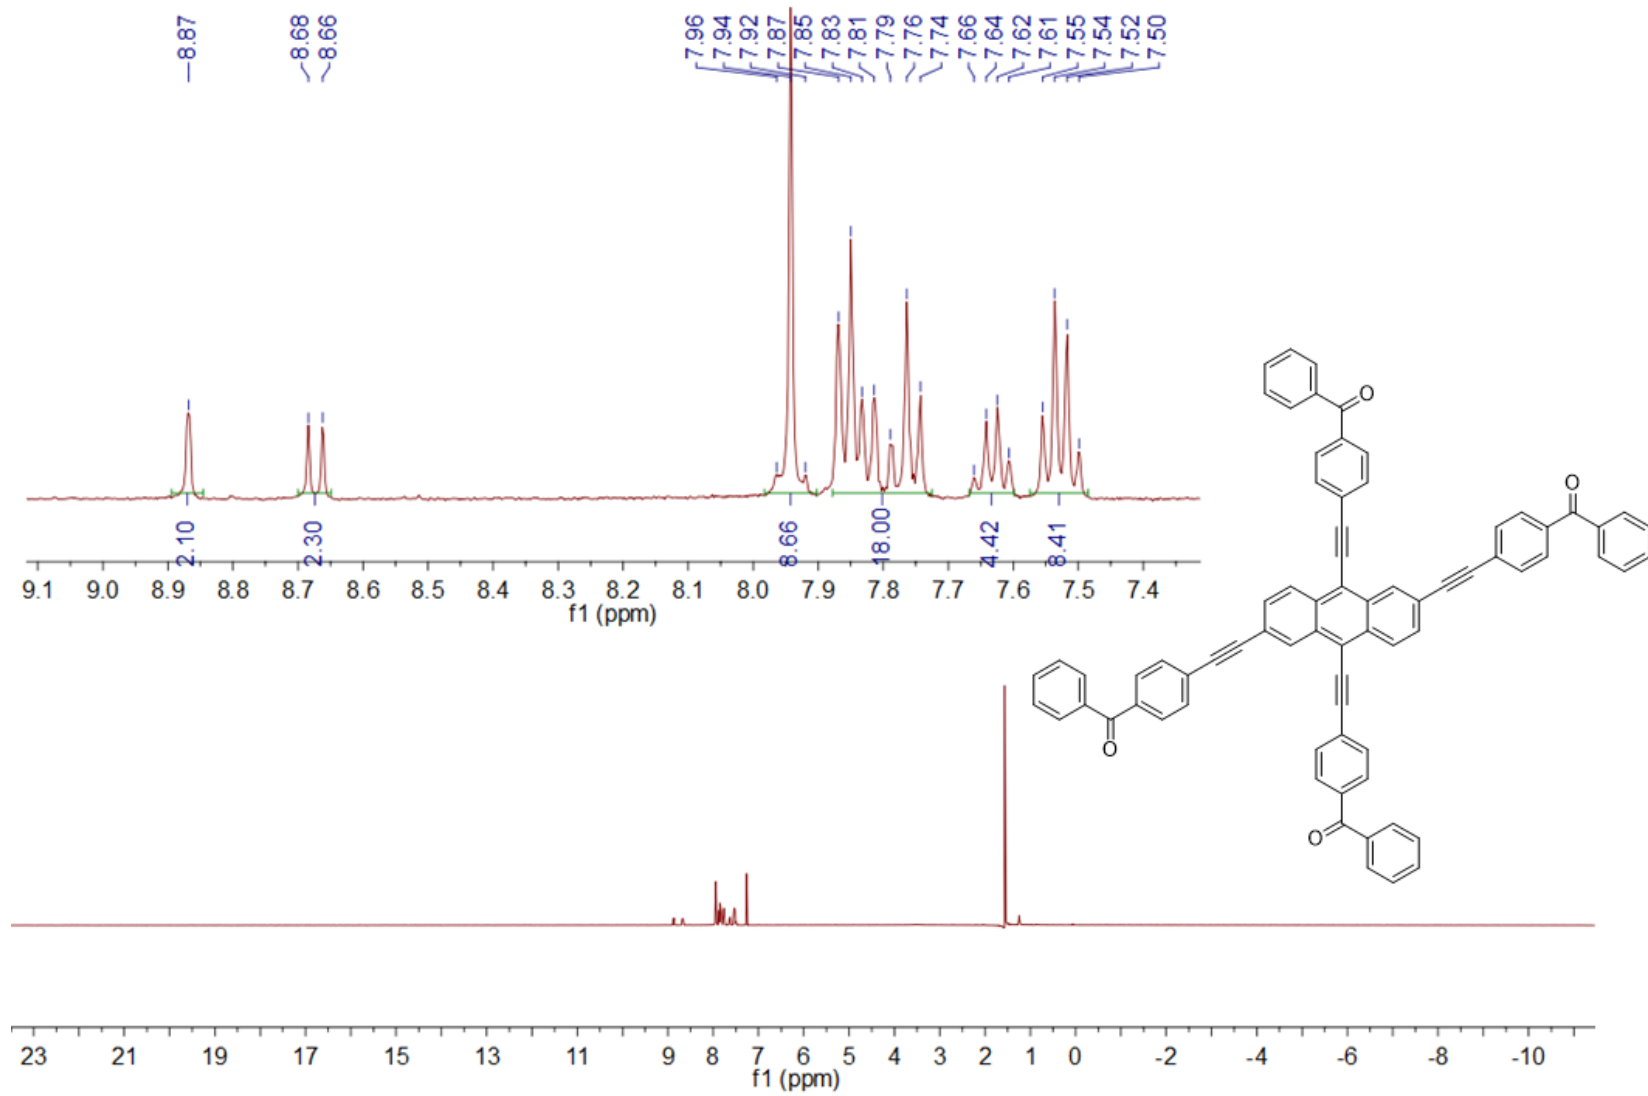

**Figure S48.**  $^1\text{H}$  NMR spectrum of **6d** (400 MHz,  $\text{CDCl}_3$ ).

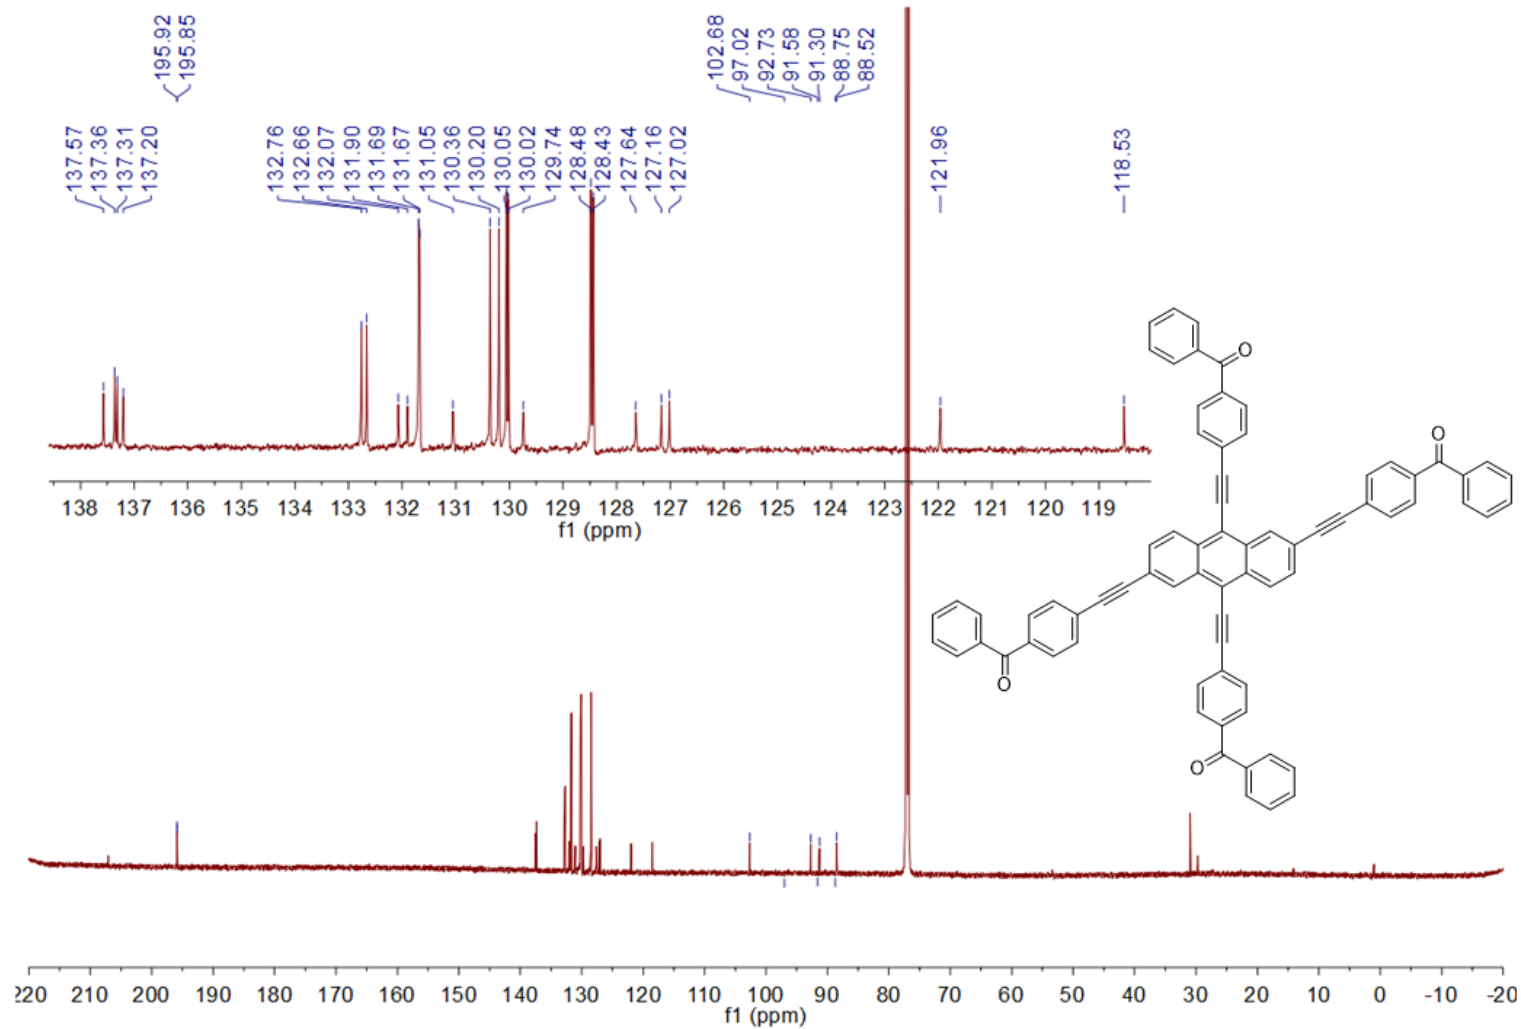

**Figure S49.**  $^{13}\text{C}\{^1\text{H}\}$  NMR spectrum of **6b** (151 MHz,  $\text{CDCl}_3$ ).

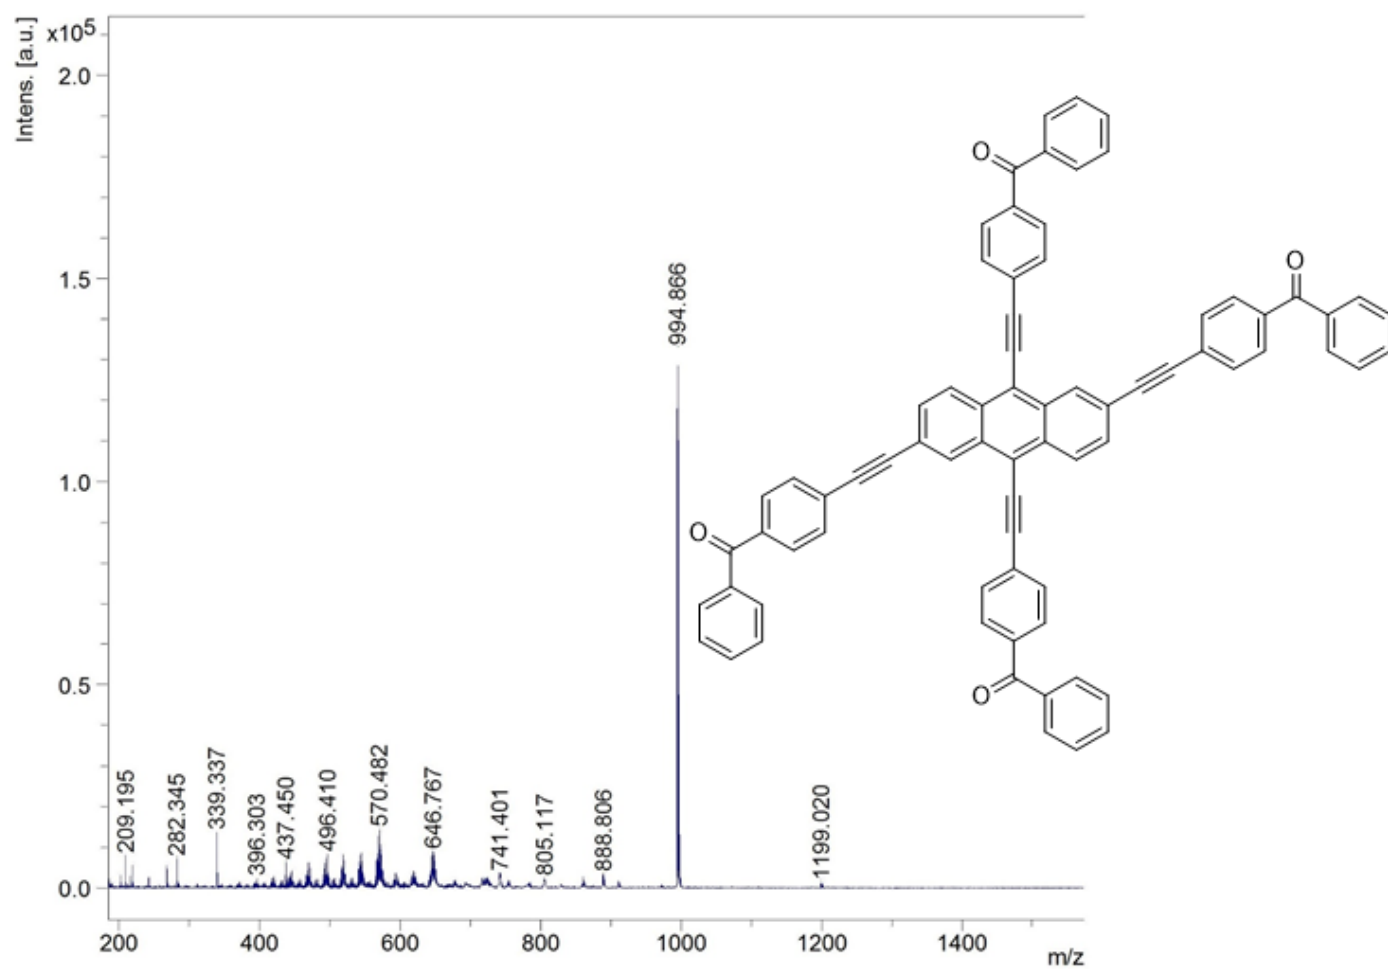

**Figure S50.** MALDI spectrum of **6d**.

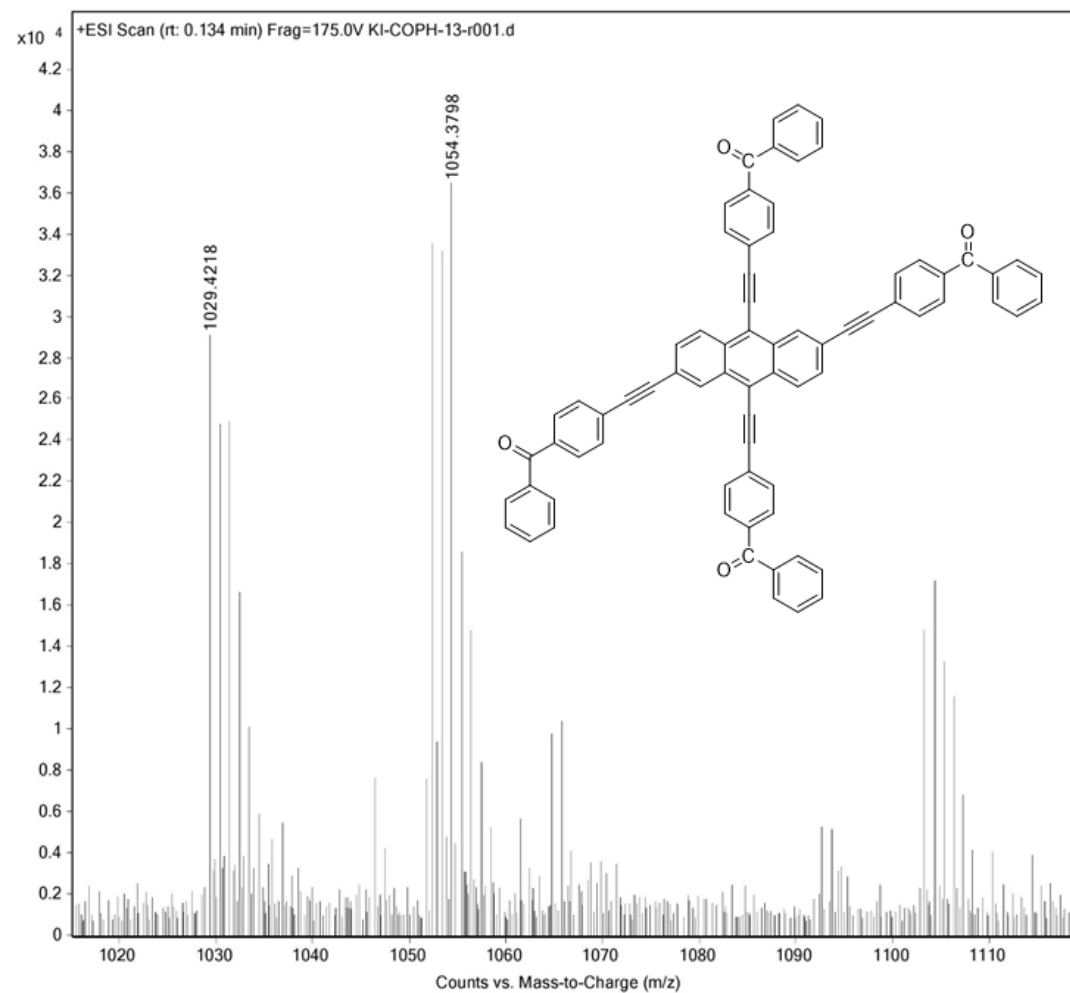

**Figure S51.** HRMS spectrum of **6d**.

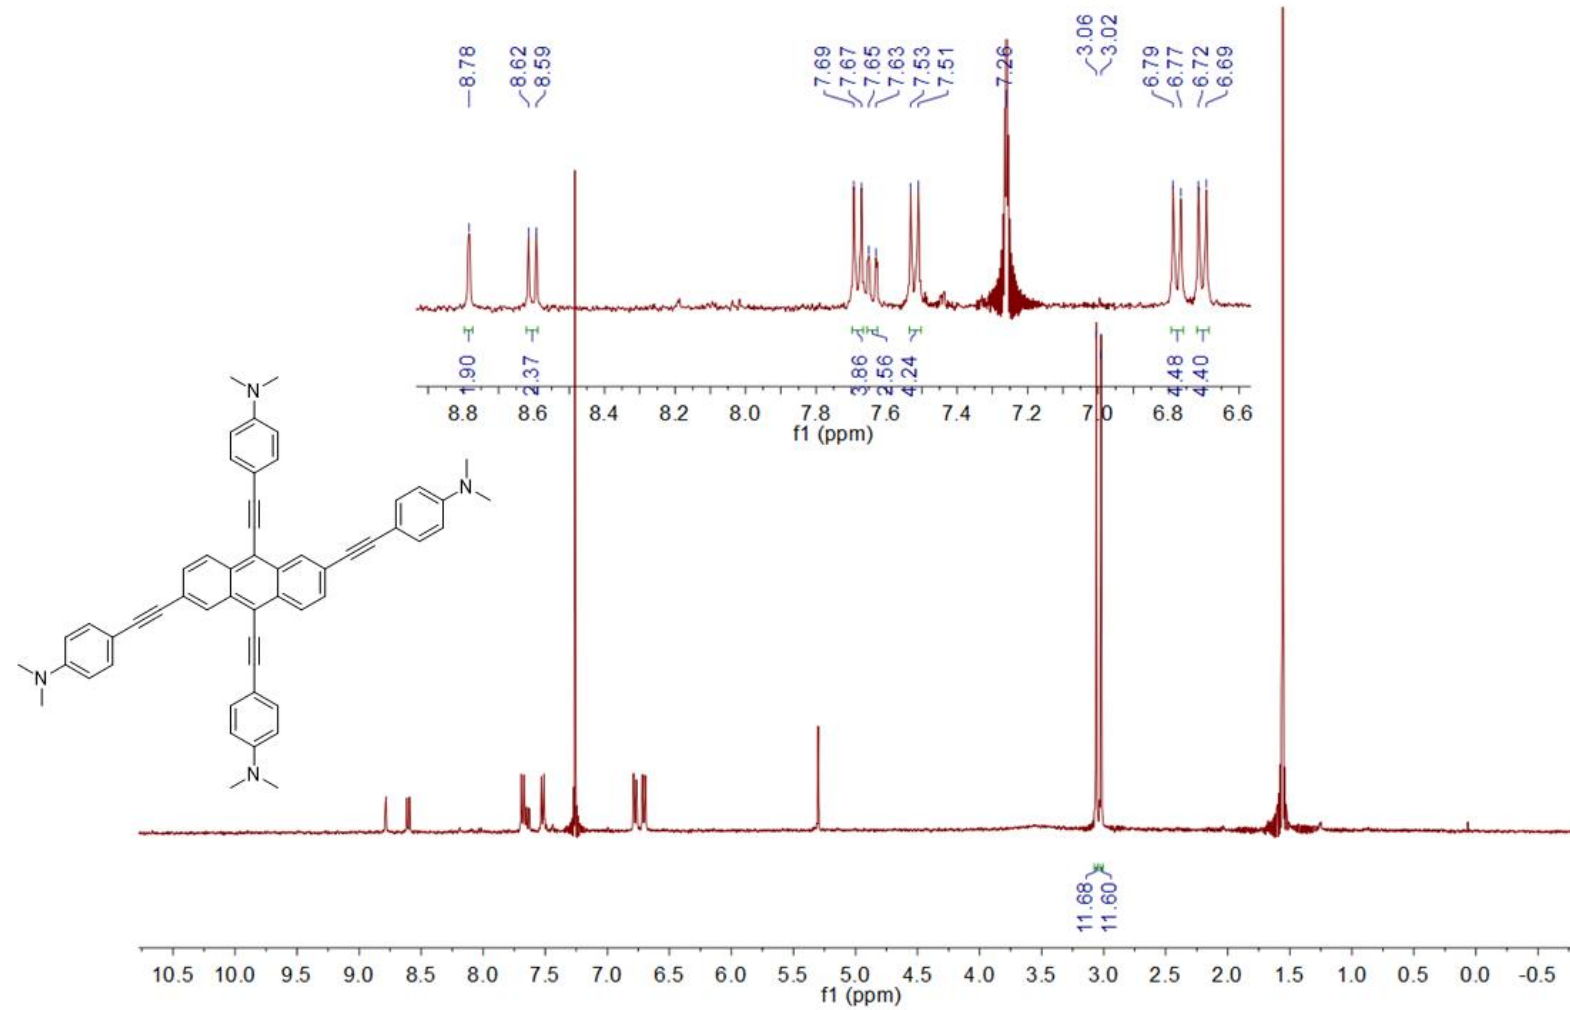

**Figure S52.**  $^1\text{H}$  NMR spectrum of **6e** (400 MHz,  $\text{CDCl}_3$ ).

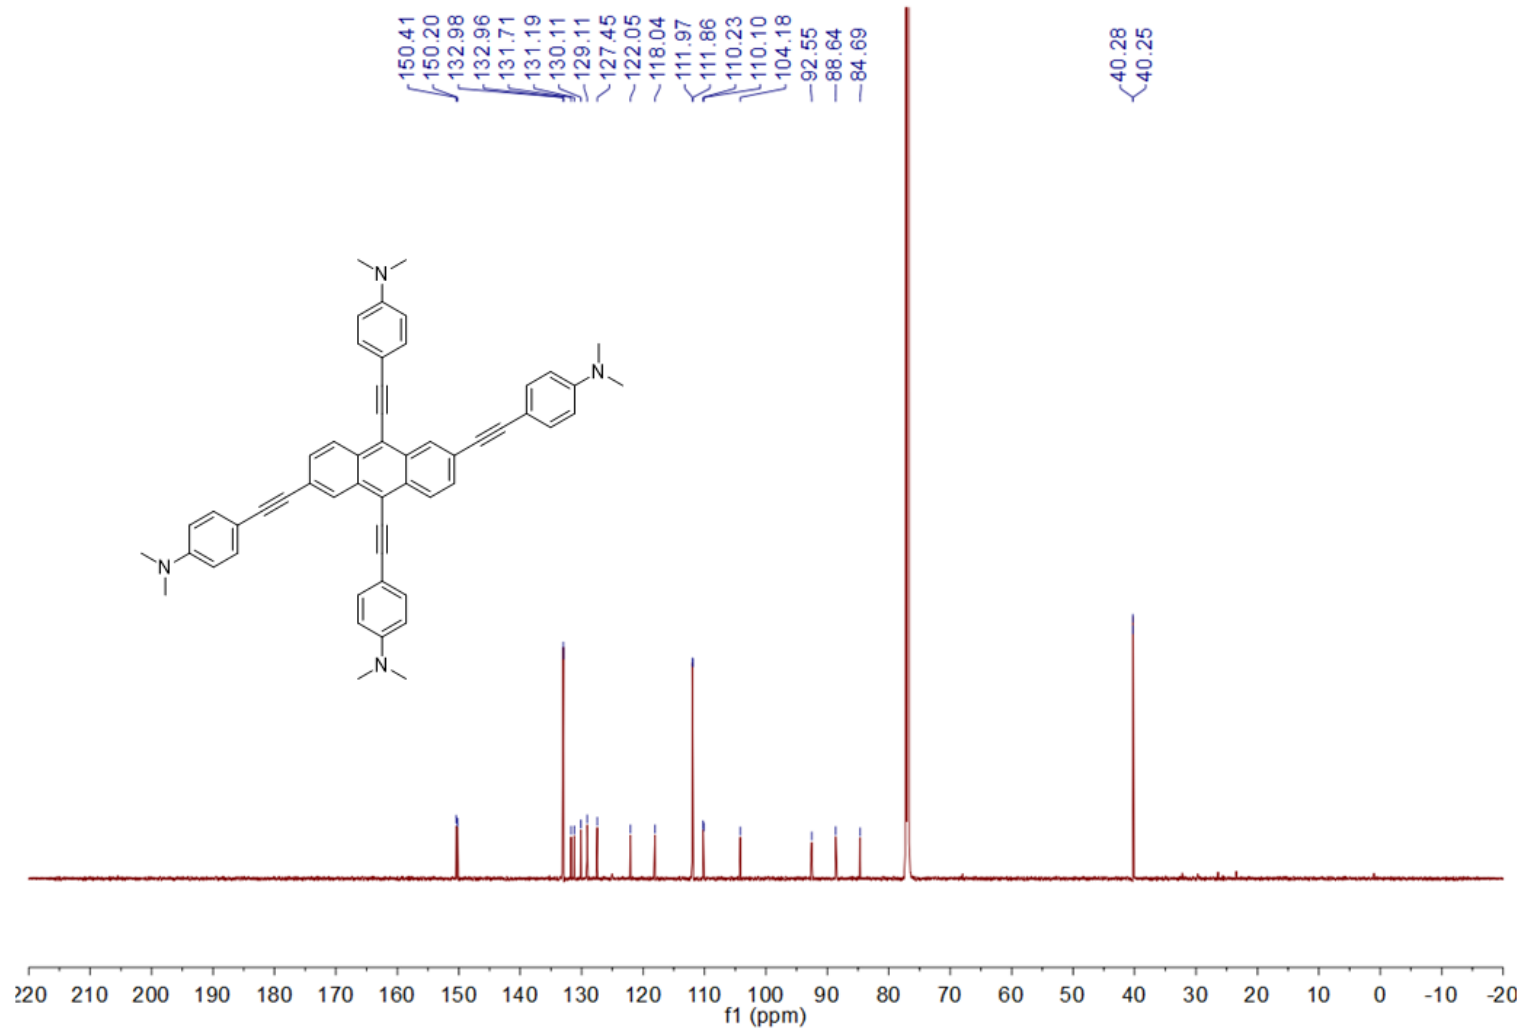

**Figure S53.**  $^{13}\text{C}\{^1\text{H}\}$  NMR spectrum of **6e** (151 MHz,  $\text{CDCl}_3$ ).





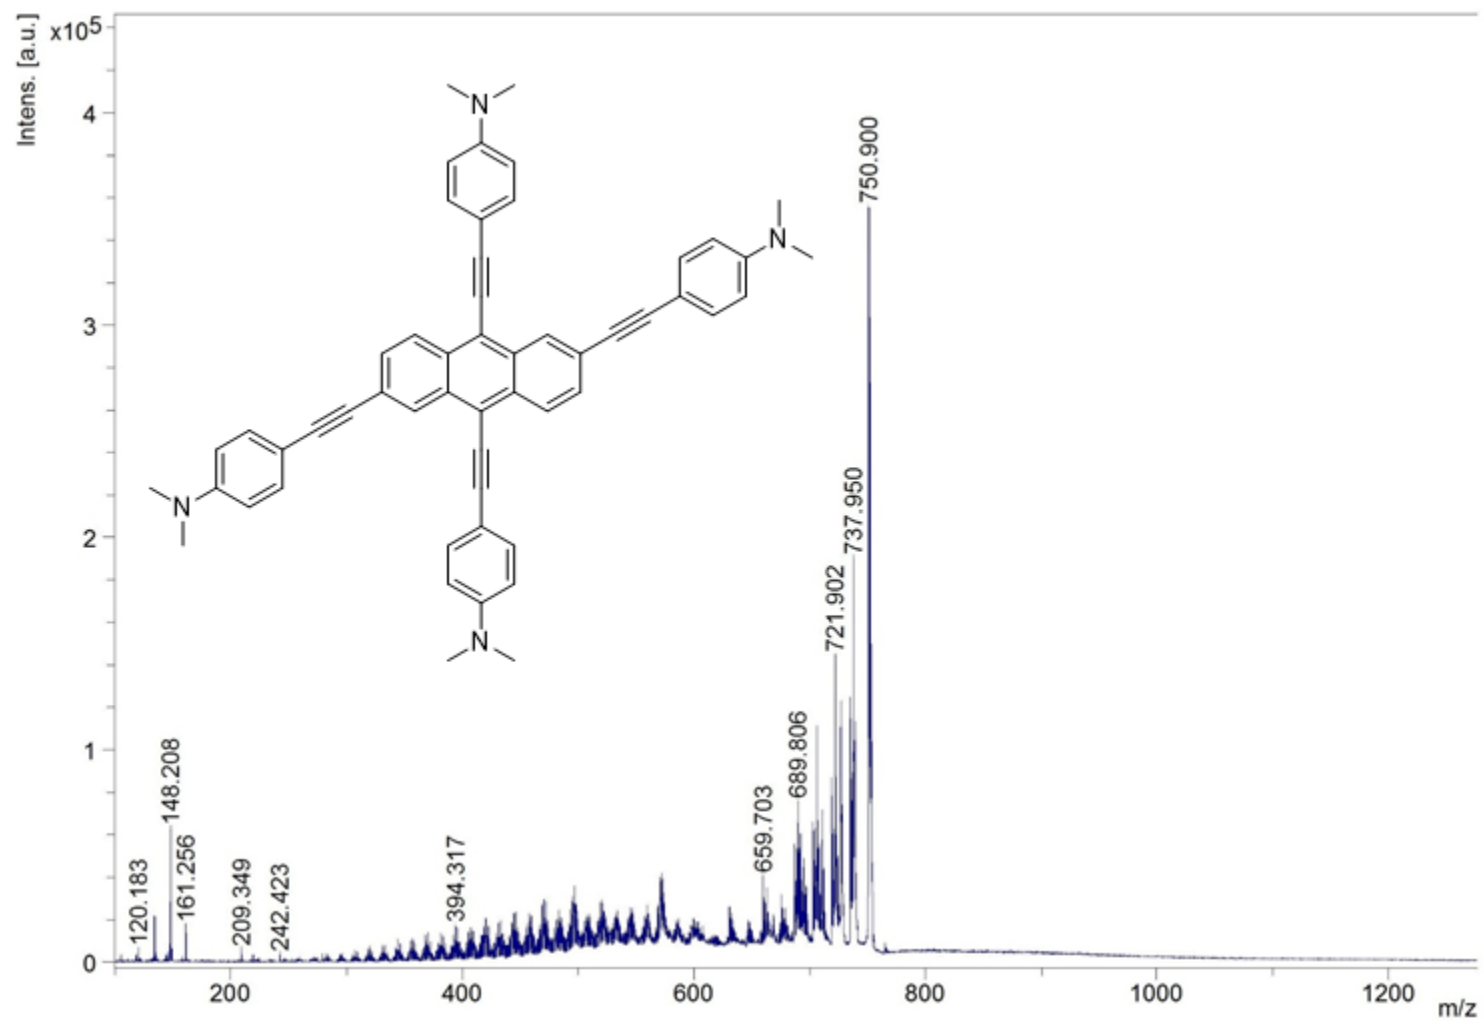

Figure S55. MALDI spectrum of 6e.

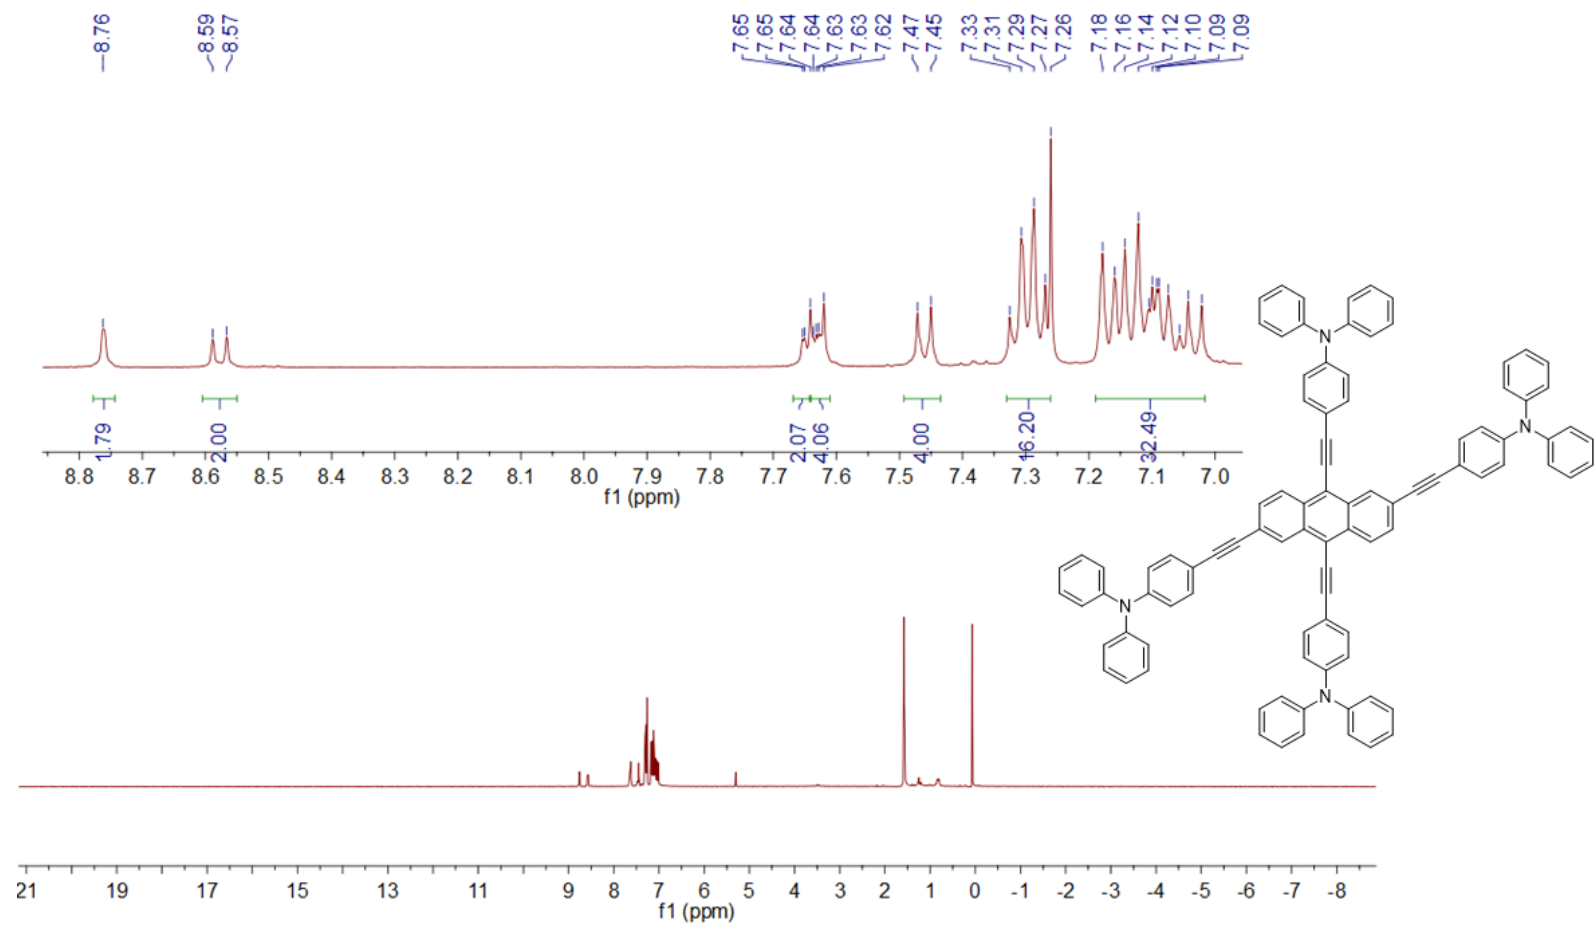

**Figure S56.**  $^1\text{H}$  NMR spectrum of **6f** (400 MHz,  $\text{CDCl}_3$ ).

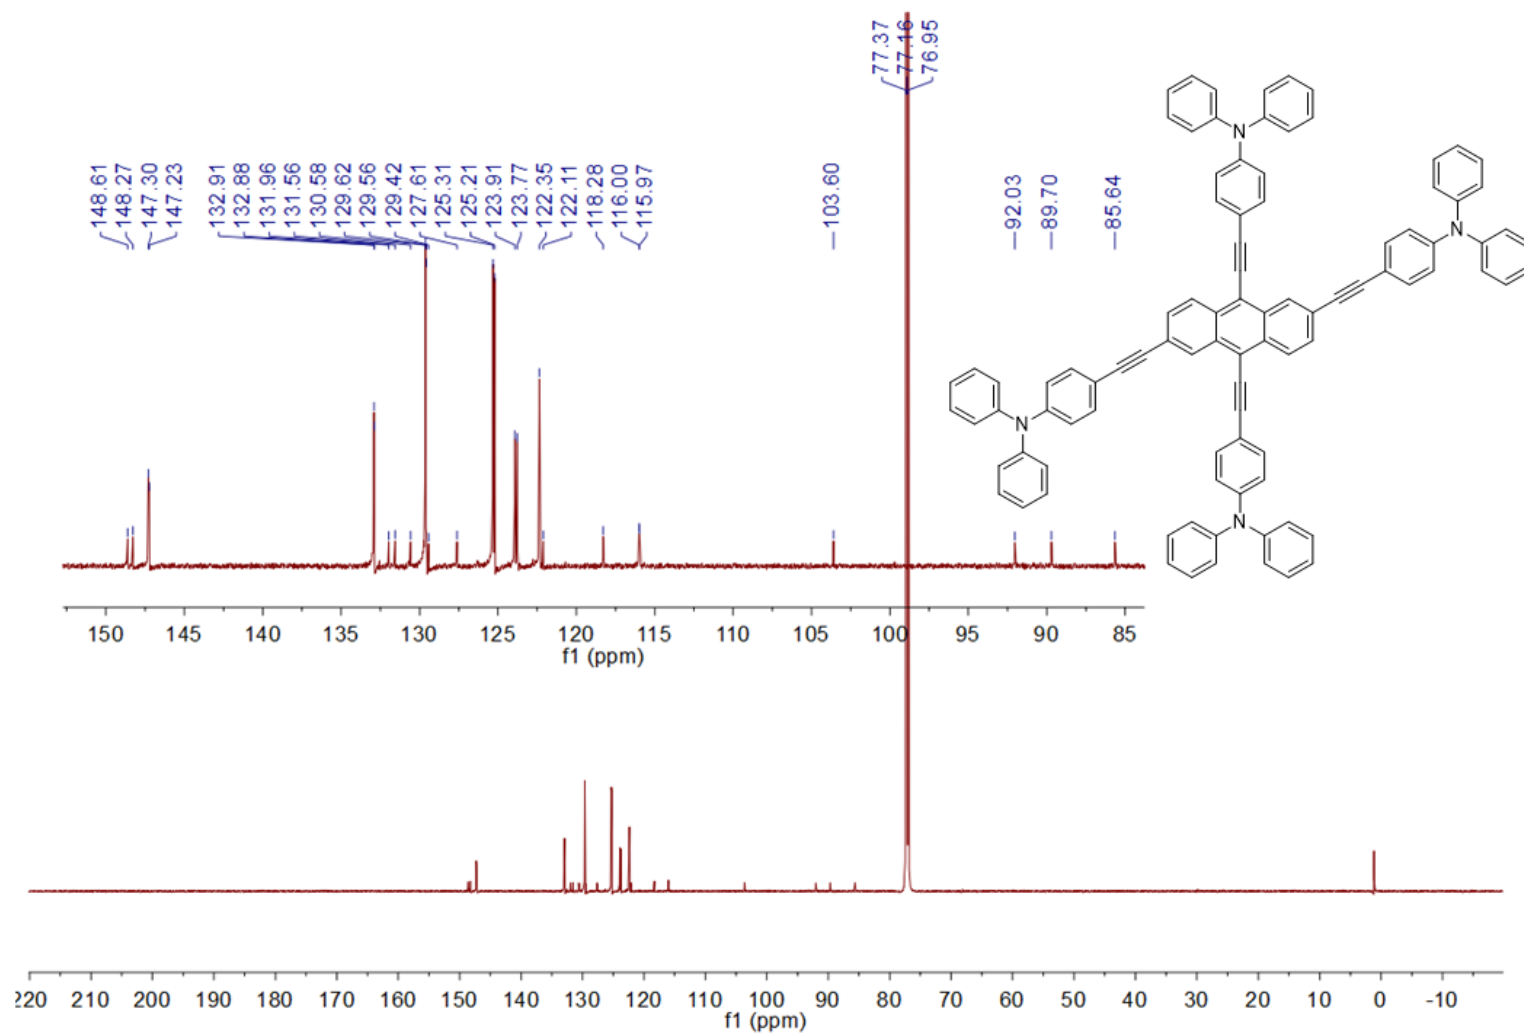

**Figure S57.**  $^{13}\text{C}\{^1\text{H}\}$  NMR spectrum **6f** (151 MHz,  $\text{CDCl}_3$ ).

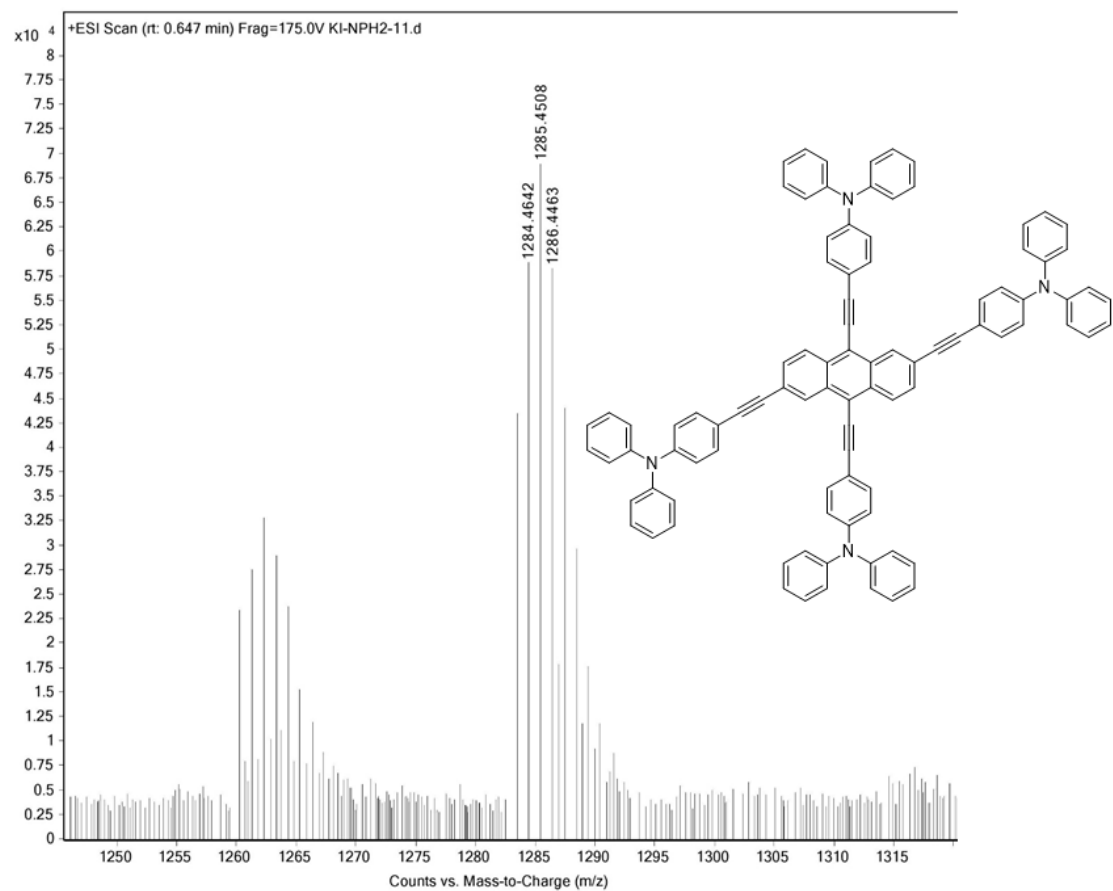

**Figure S58.** HRMS spectrum of **6f**.

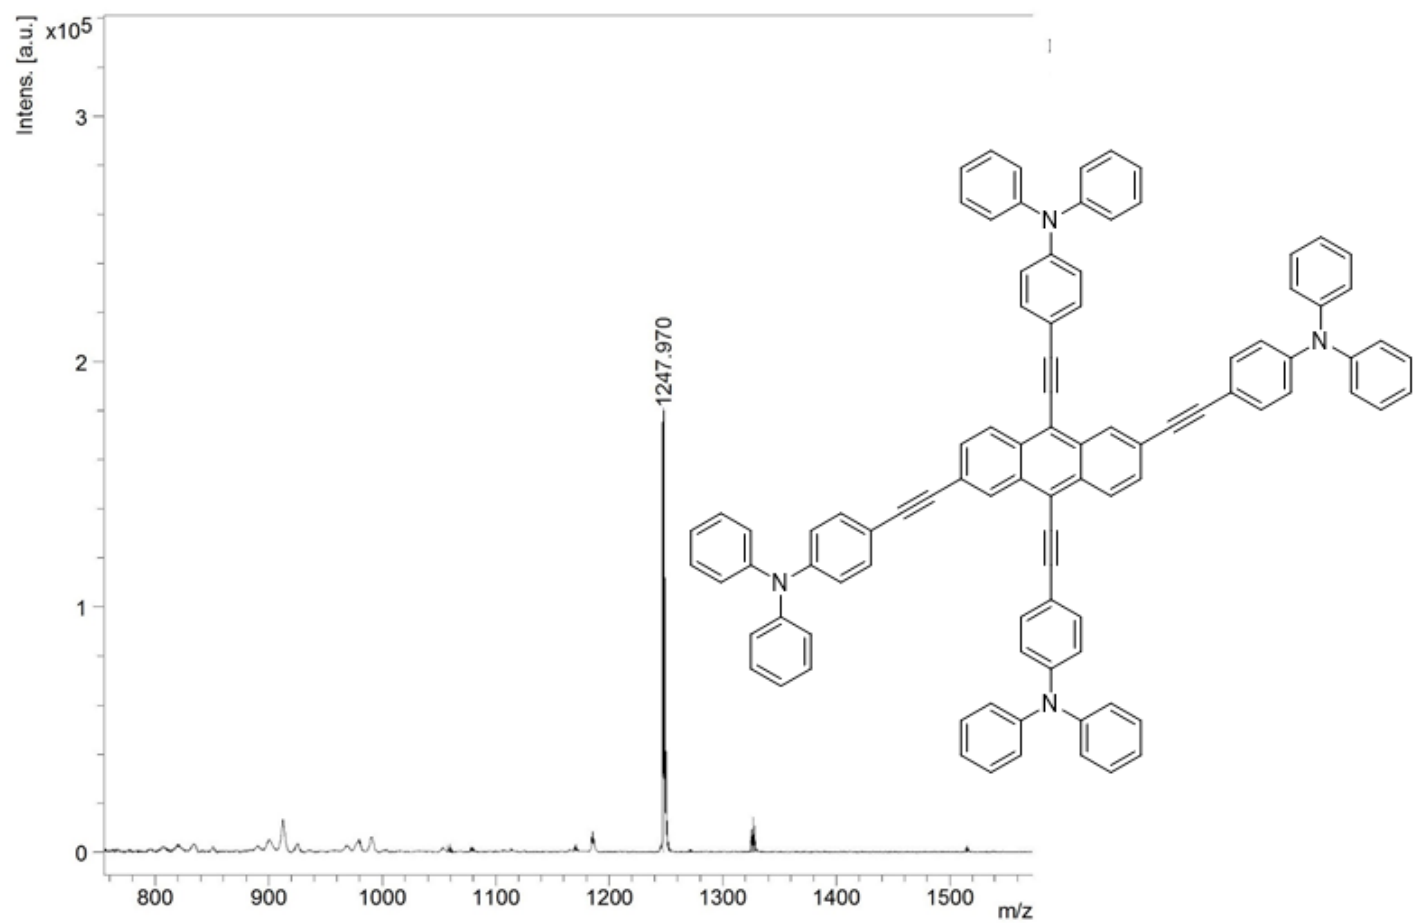

**Figure S59.** MALDI spectrum **6f**

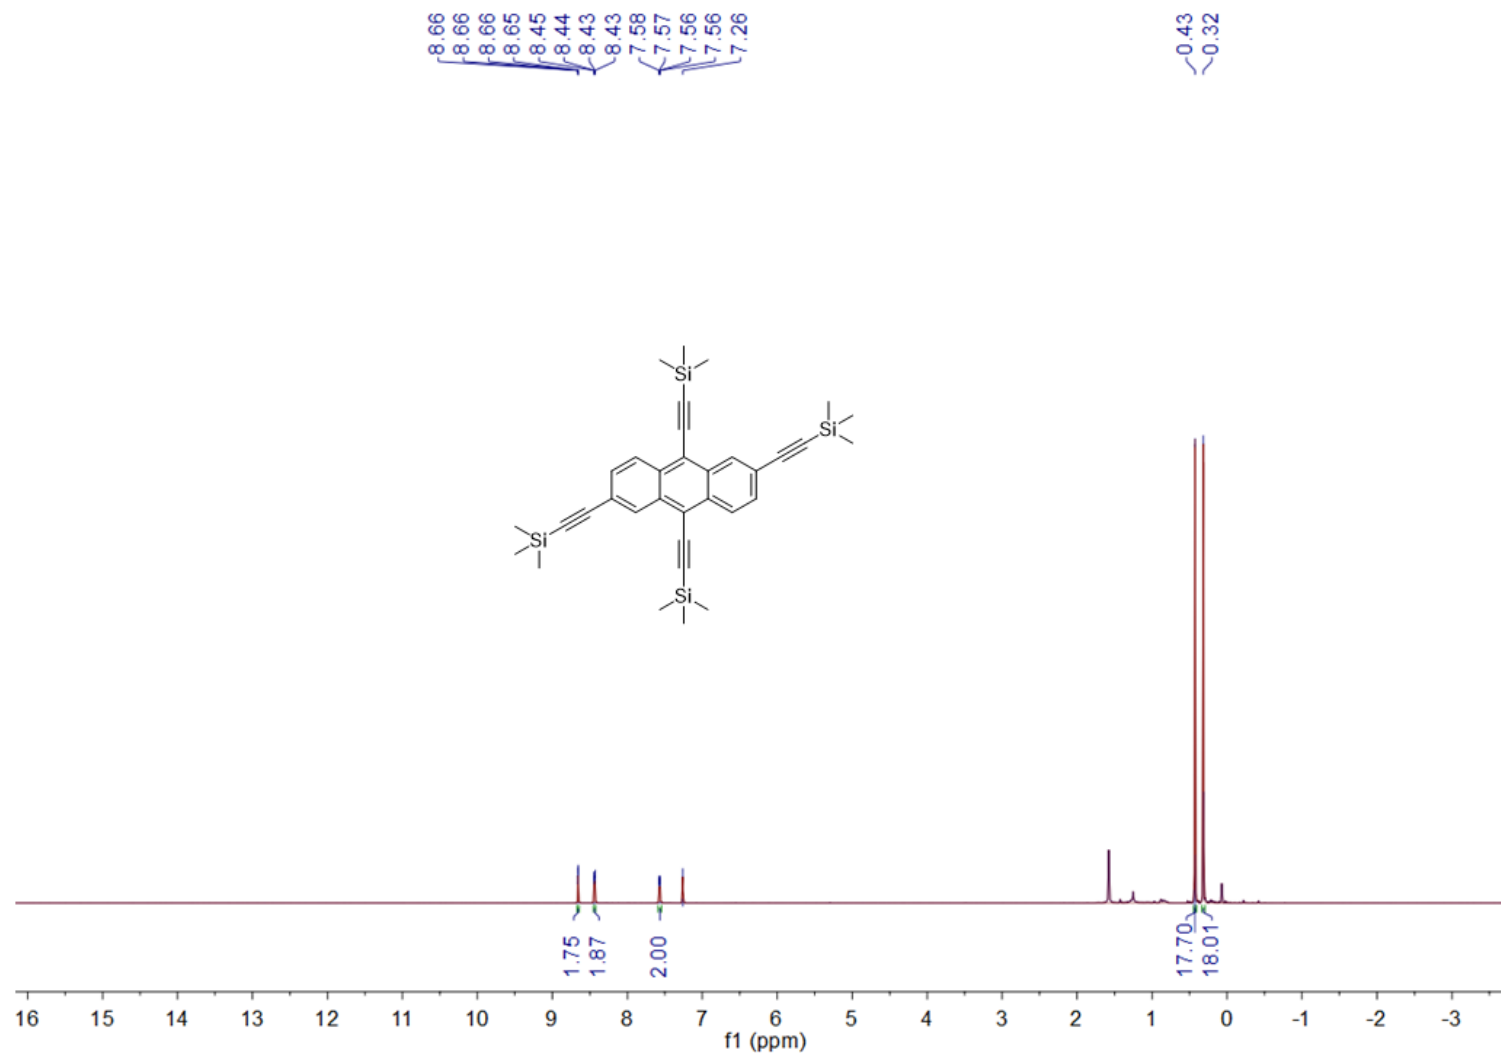

**Figure S60.**  $^1\text{H}$  NMR spectrum of **6g** (600 MHz,  $\text{CDCl}_3$ ).

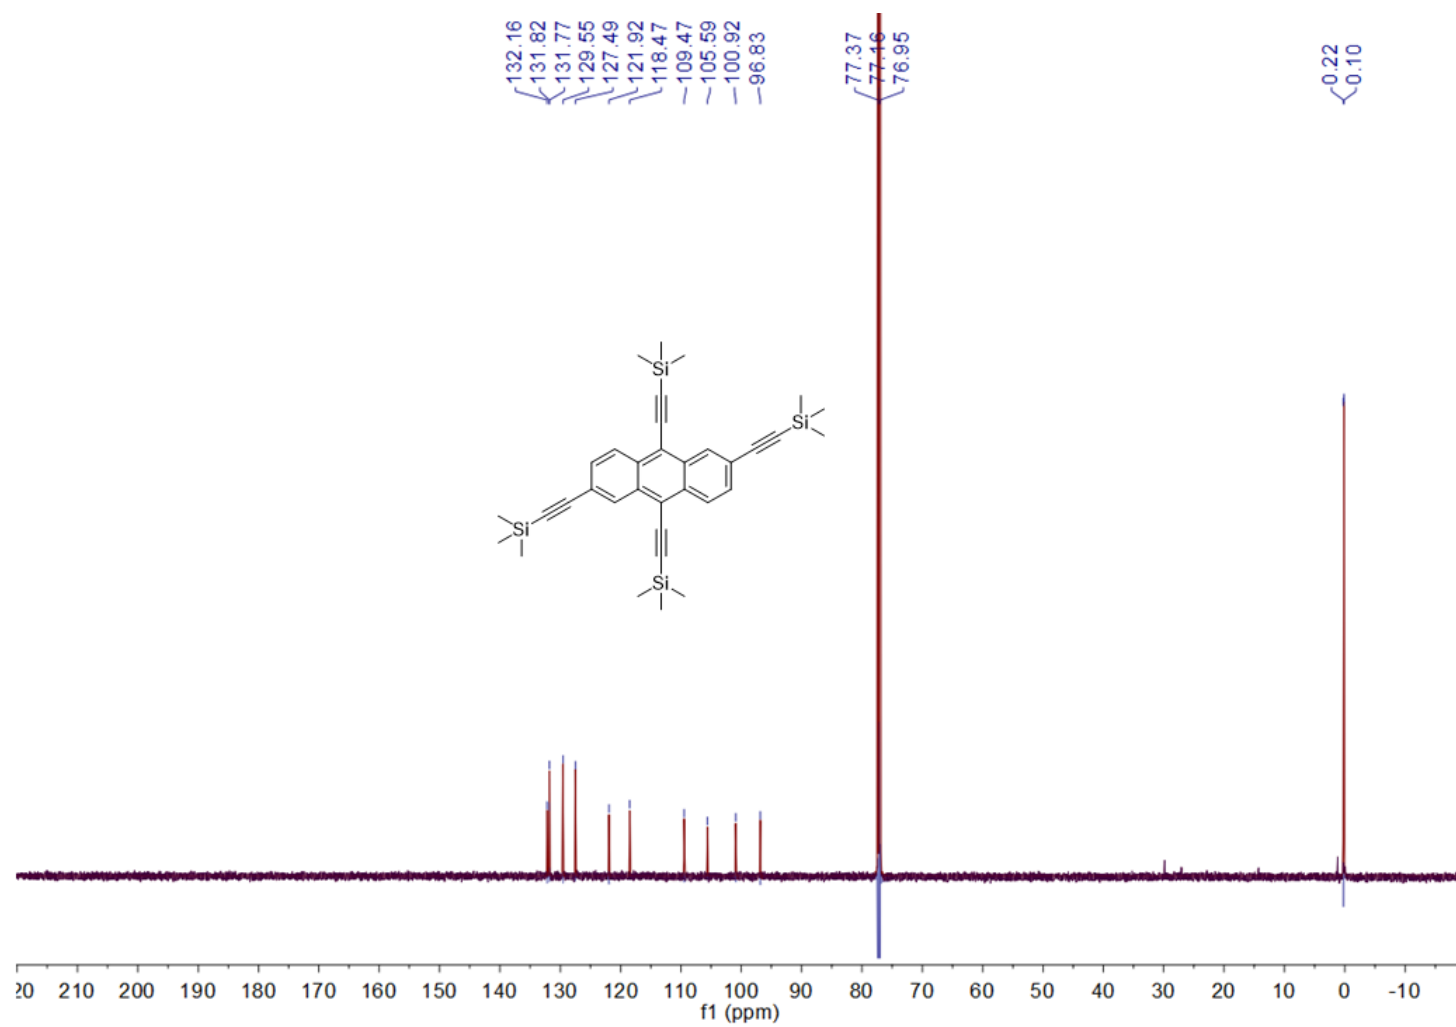

**Figure S61.**  $^{13}\text{C}\{^1\text{H}\}$  NMR spectrum of **6g** (151 MHz,  $\text{CDCl}_3$ ).



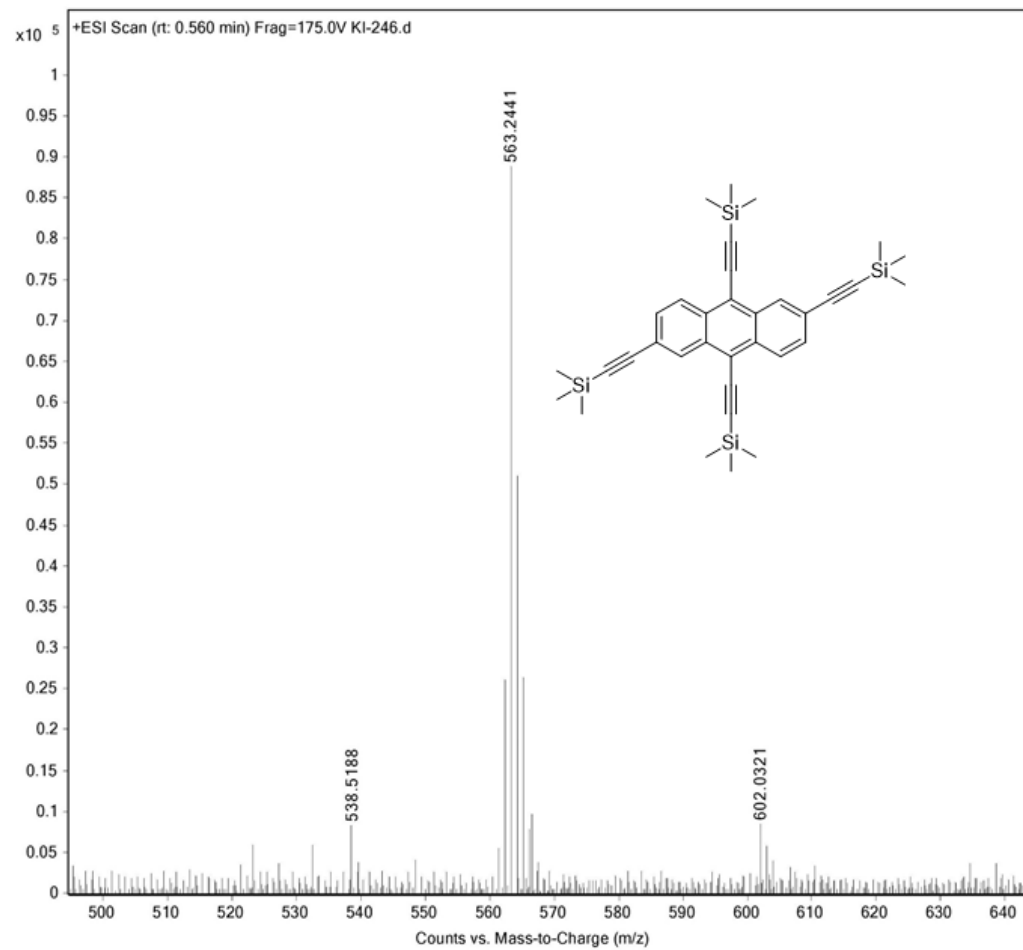

**Figure S62.** HRMS spectrum of **6g**.

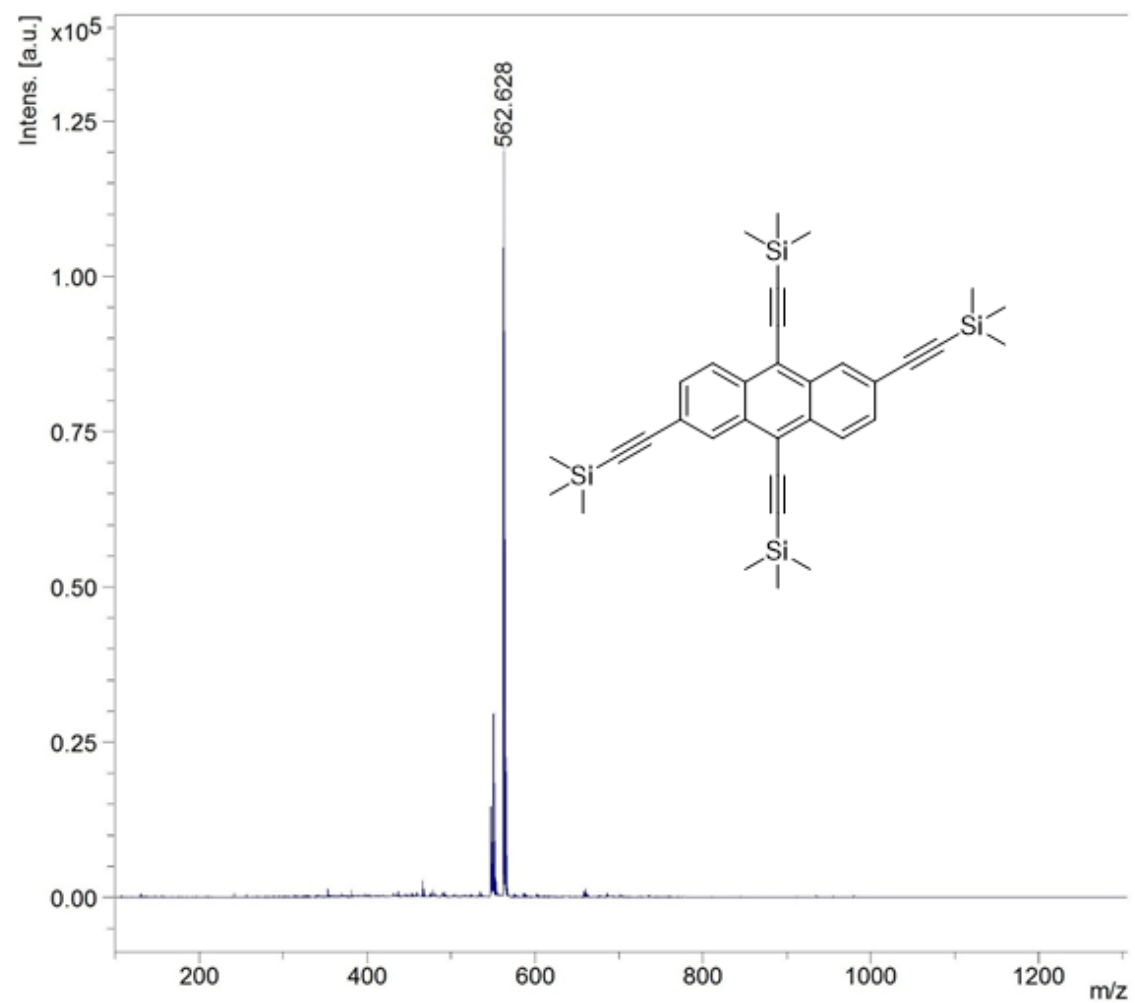

**Figure S63.** MALDI spectrum of **6g**.

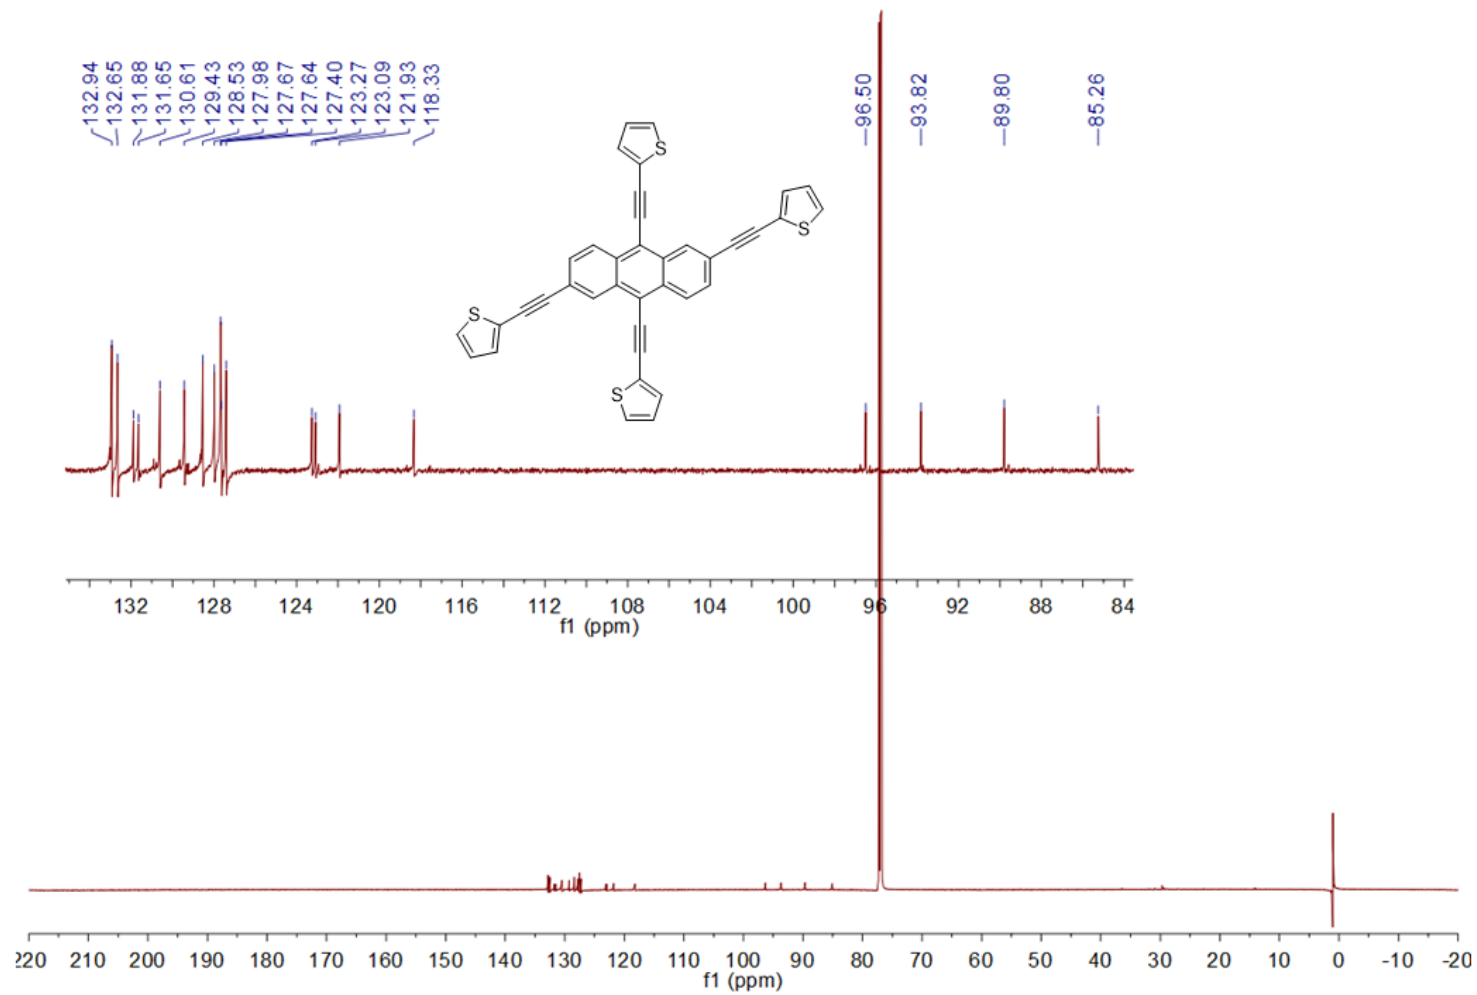

**Figure S64.** <sup>1</sup>H NMR spectrum of **6h** (600 MHz, CDCl<sub>3</sub>).

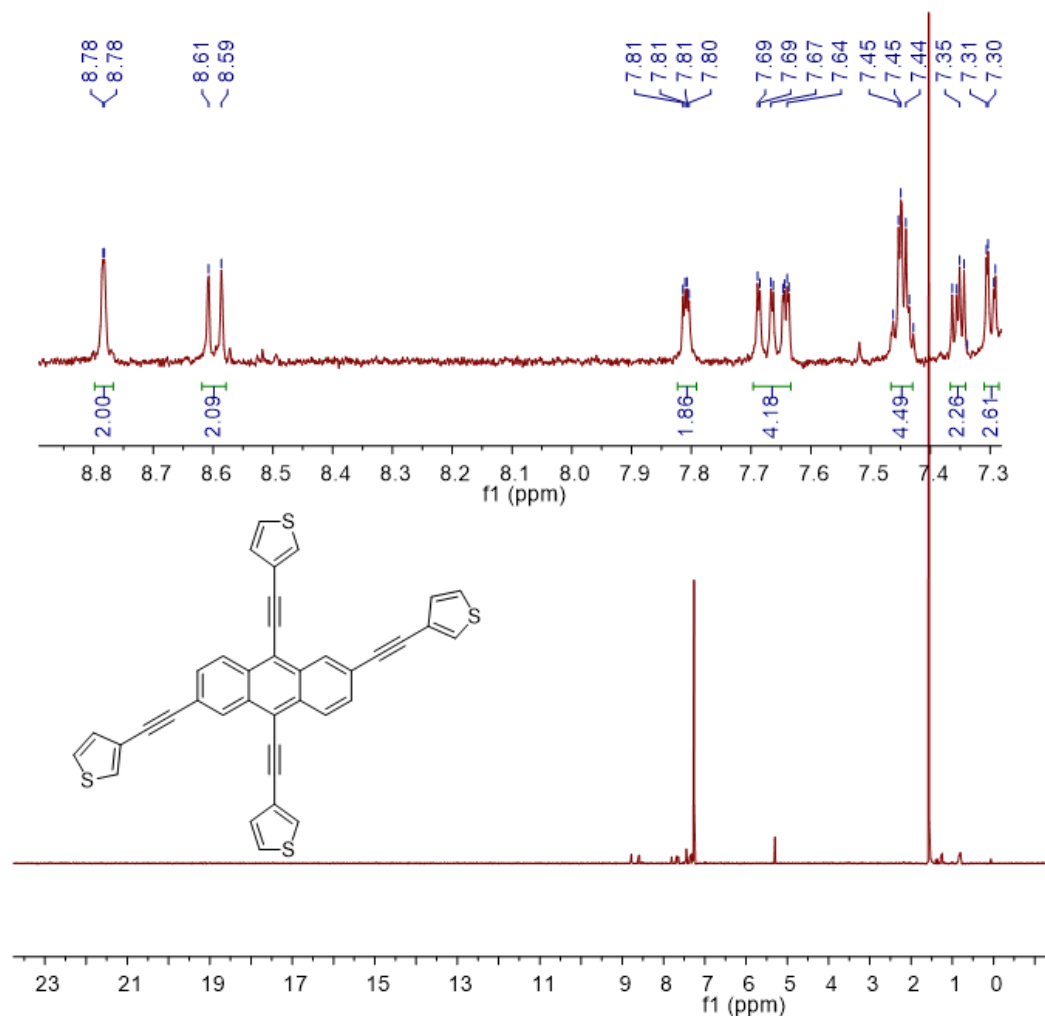

**Figure S65.**  $^{13}\text{C}\{^1\text{H}\}$  NMR spectrum of **6h** (151 MHz,  $\text{CDCl}_3$ ).

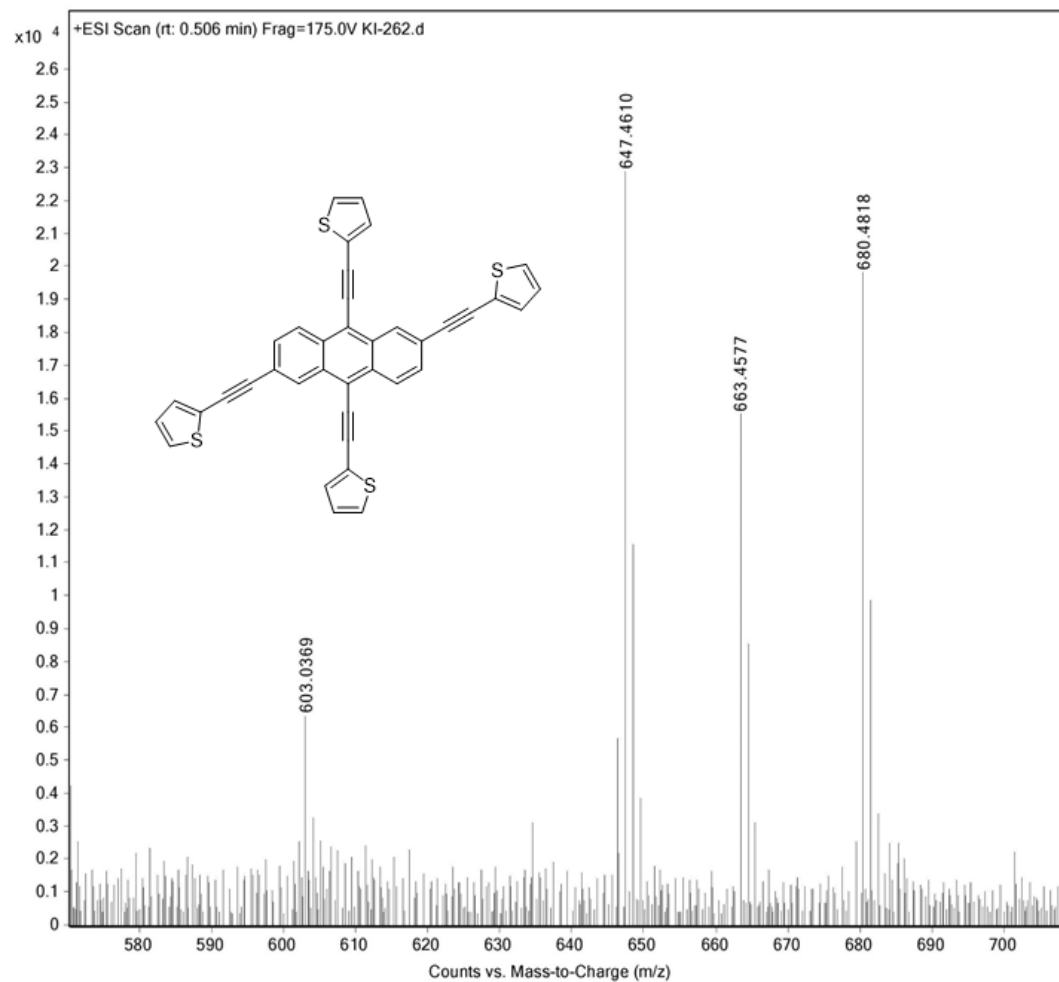

**Figure S66.** HRMS spectrum of **6h**.

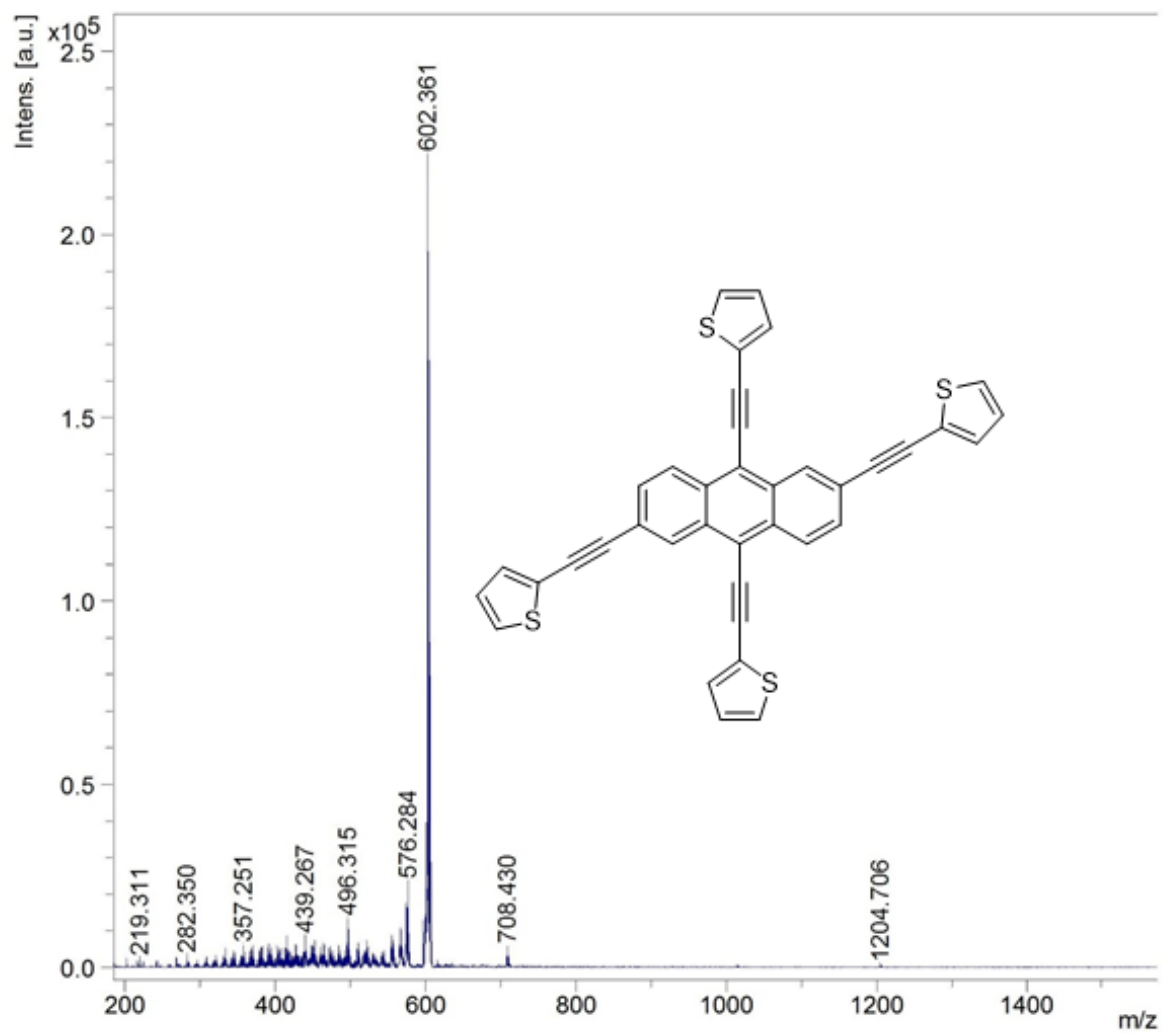

Figure S67. MALDI spectrum of **6h**.

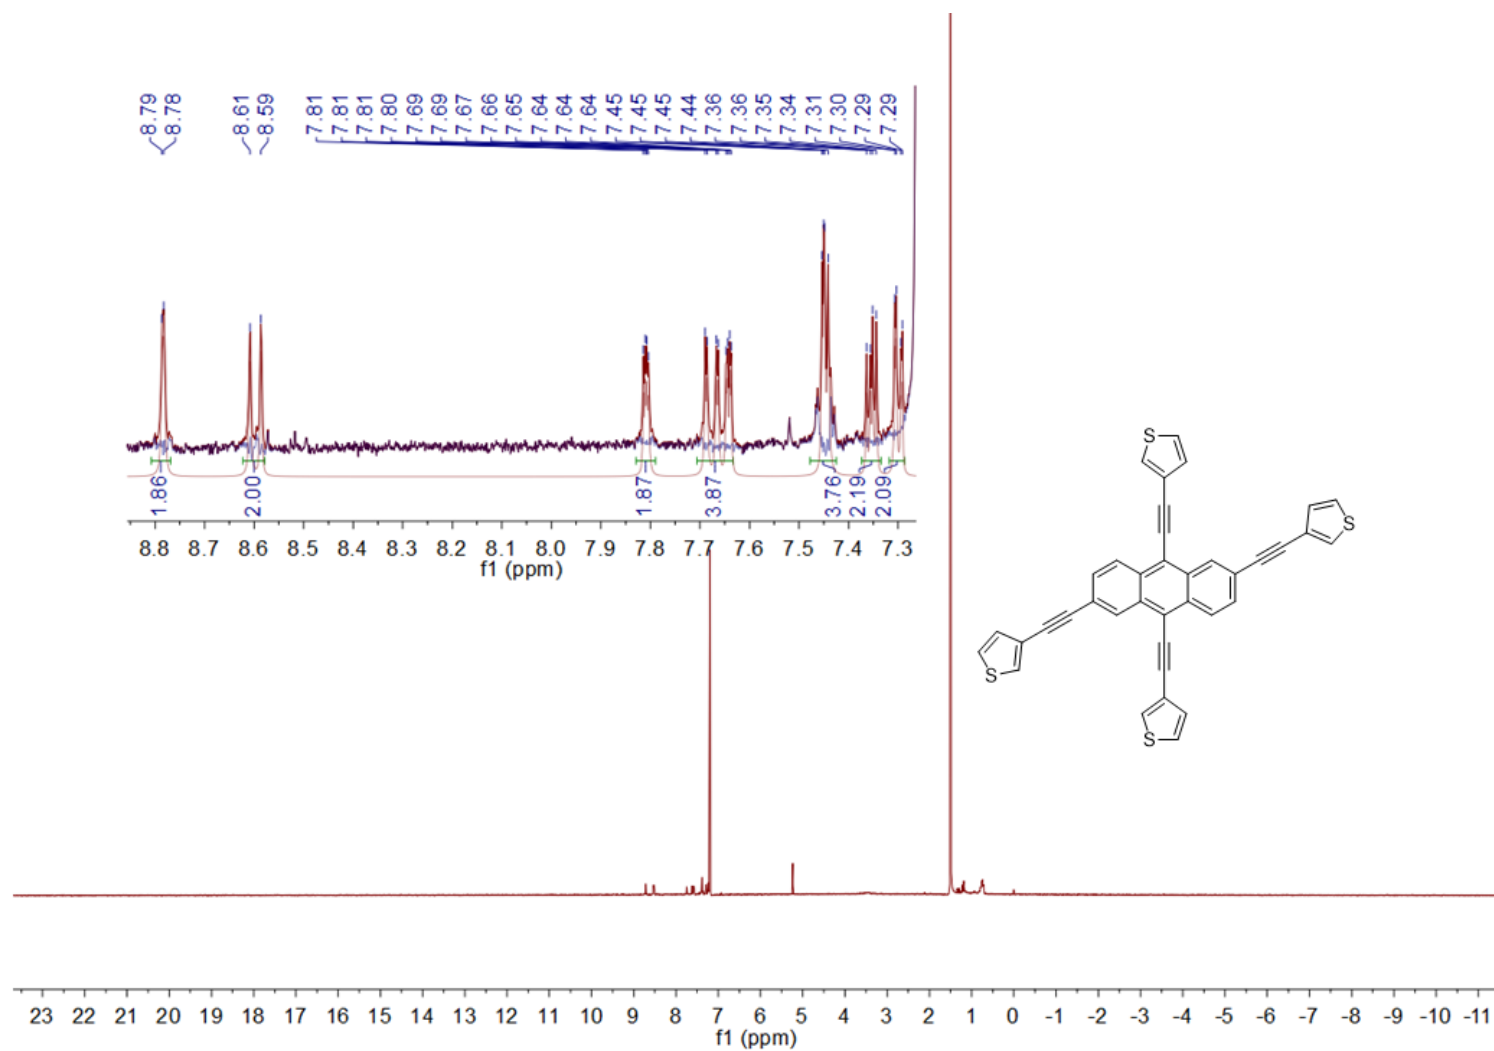

**Figure S68**  $^1\text{H}$  NMR spectrum of **6i** (400 MHz,  $\text{CDCl}_3$ ).

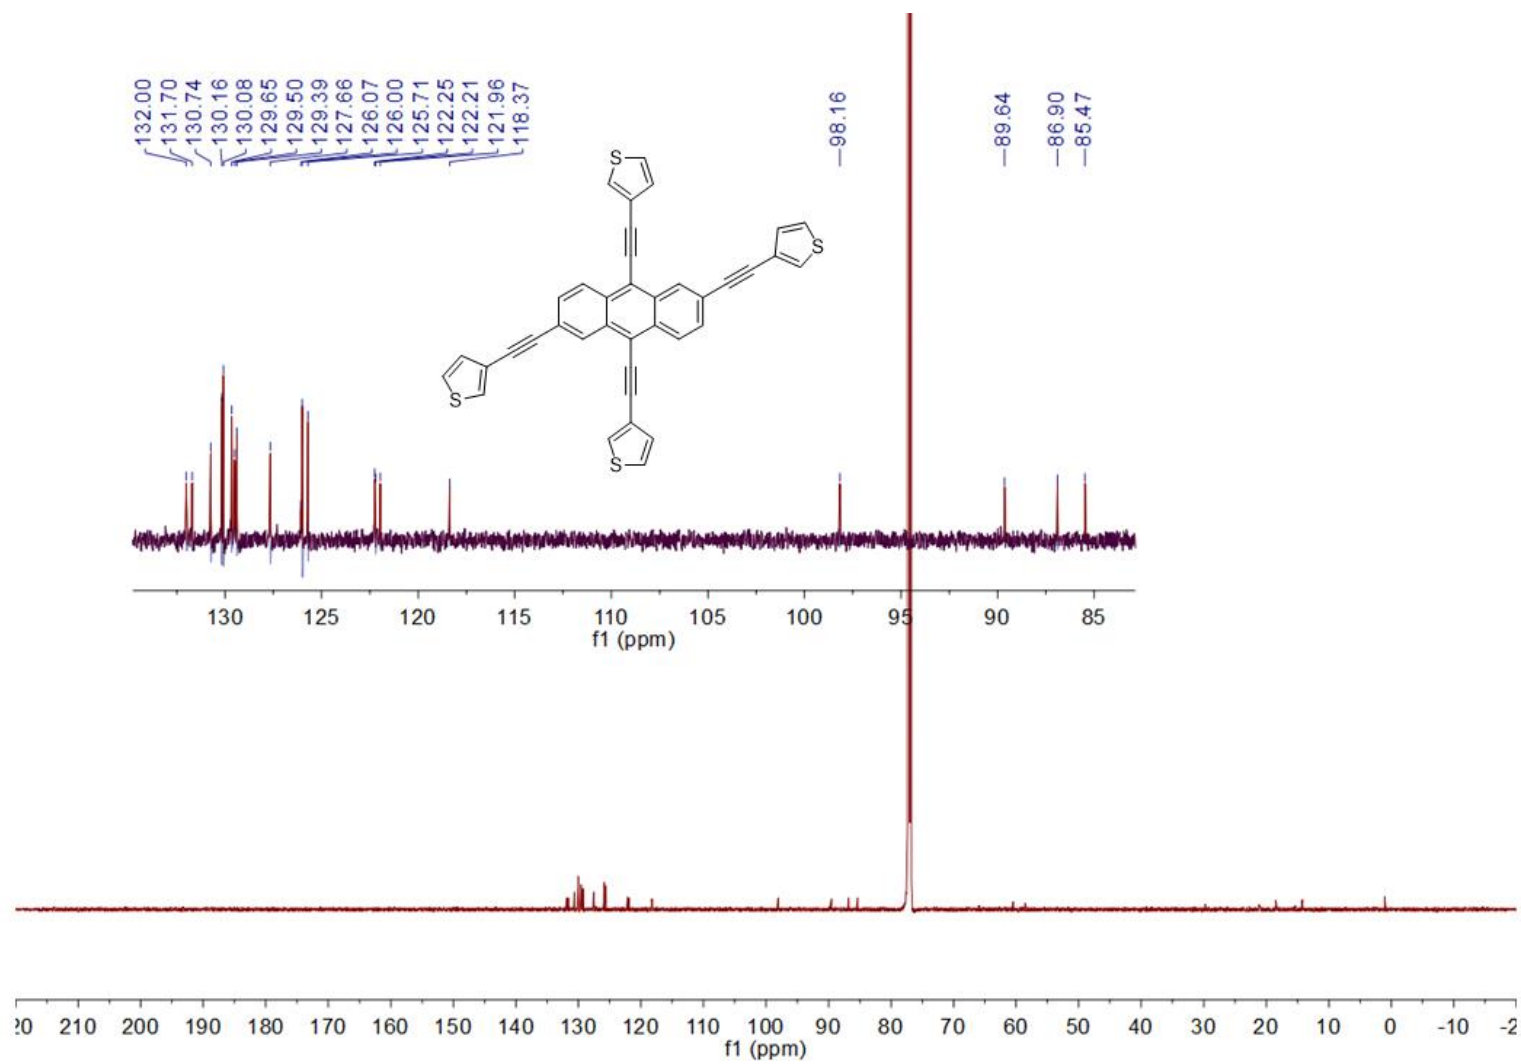

**Figure S69.**  $^{13}\text{C}\{^1\text{H}\}$  NMR spectrum of **6i** (151 MHz,  $\text{CDCl}_3$ ).



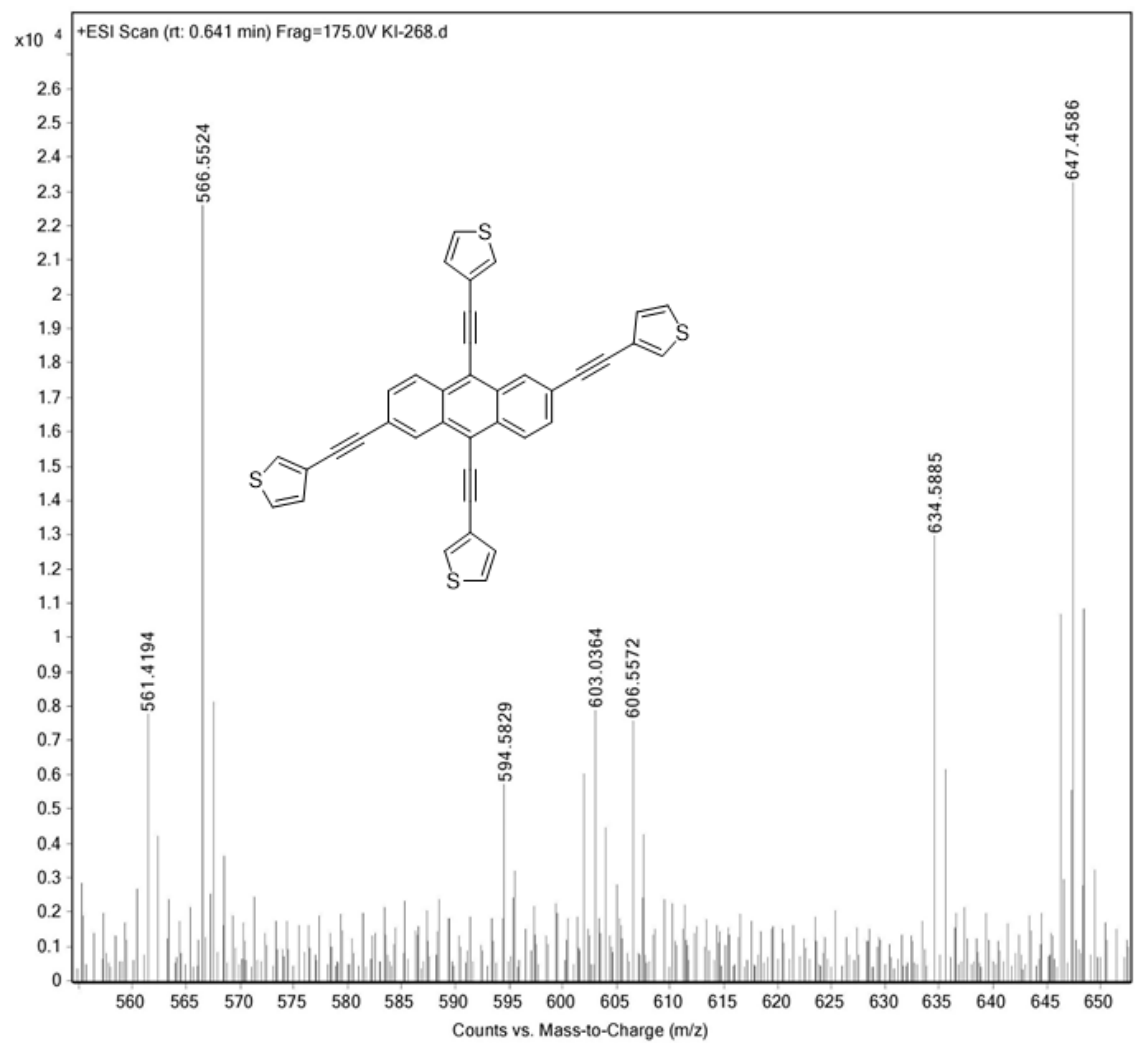

Figure S70. HRMS spectrum of **6i**.

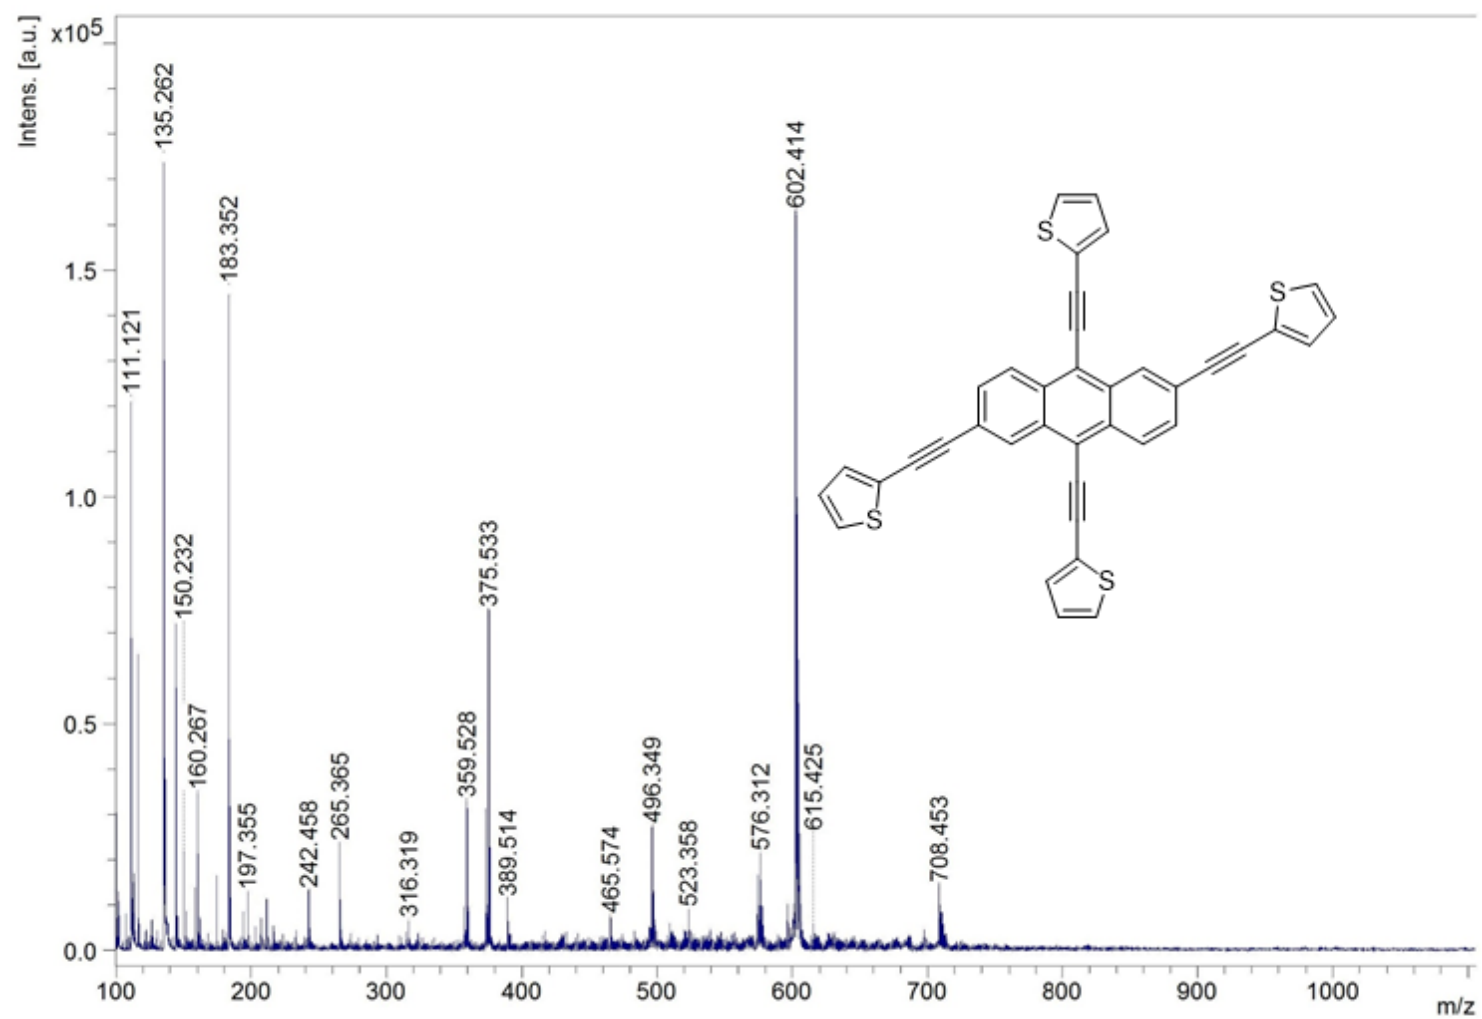

Figure S71. MALDI spectrum of **6i**.

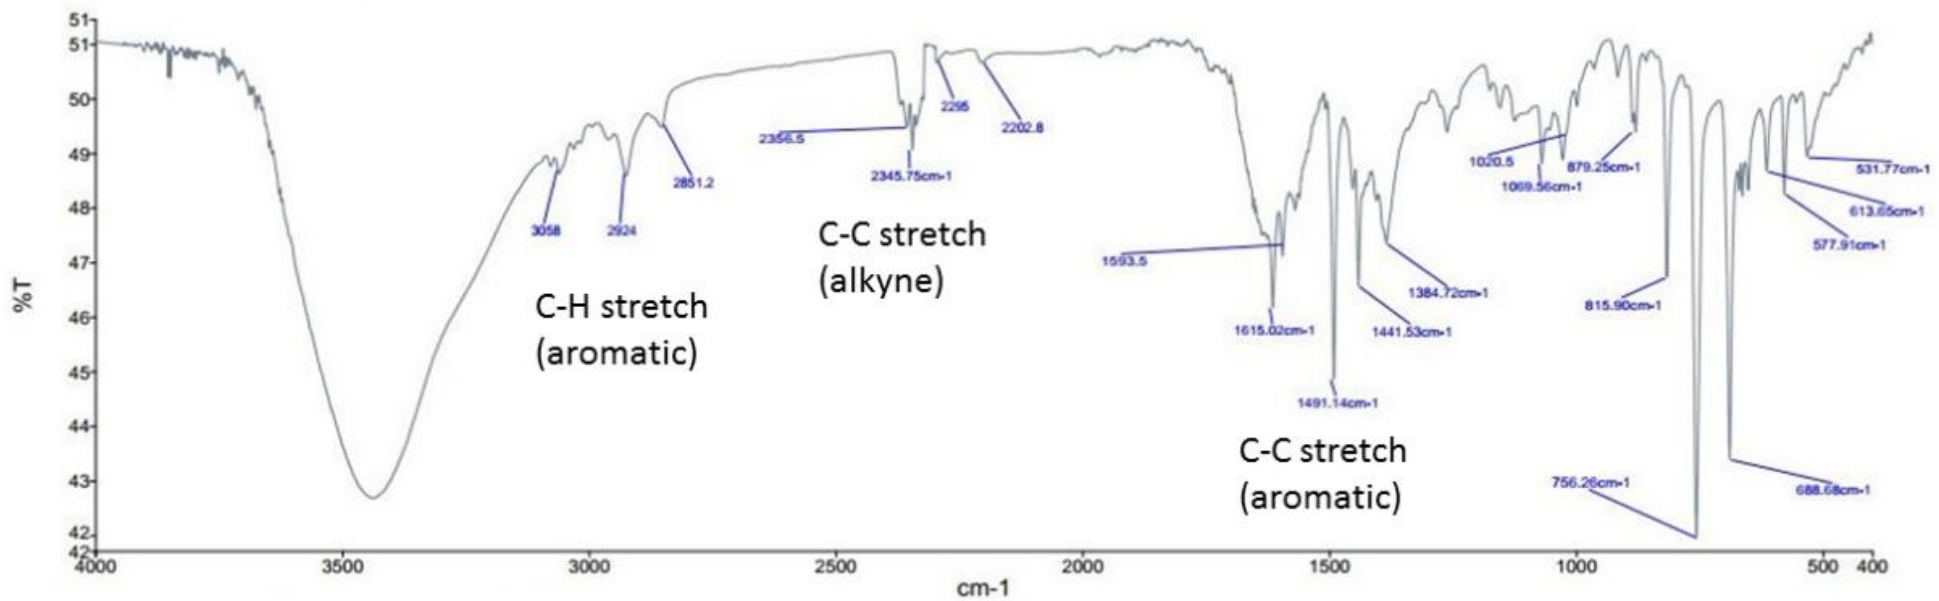

Figure S72. IR spectrum of 6 in KBr pellet.

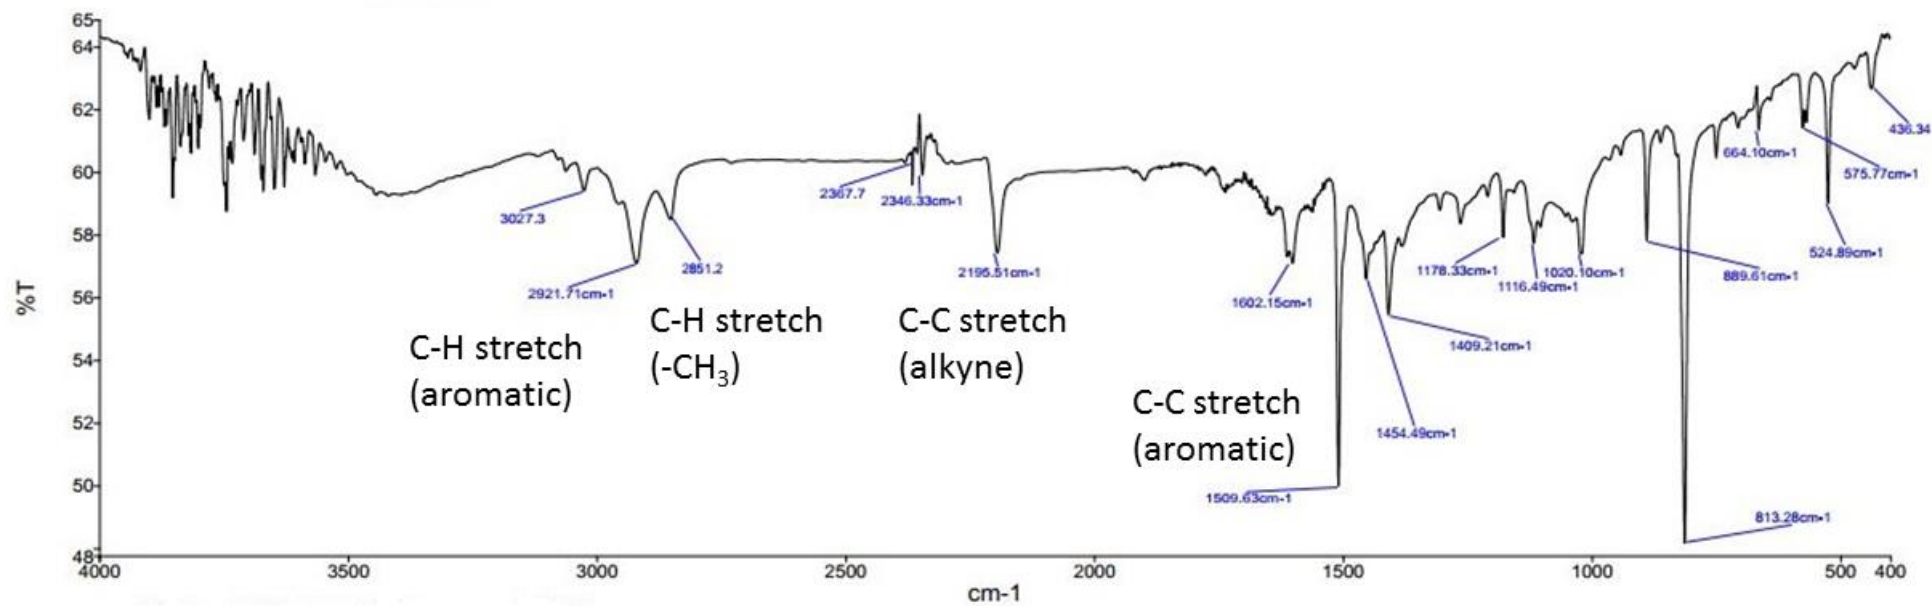

Figure S73. IR spectrum of **6a** in KBr pellet.

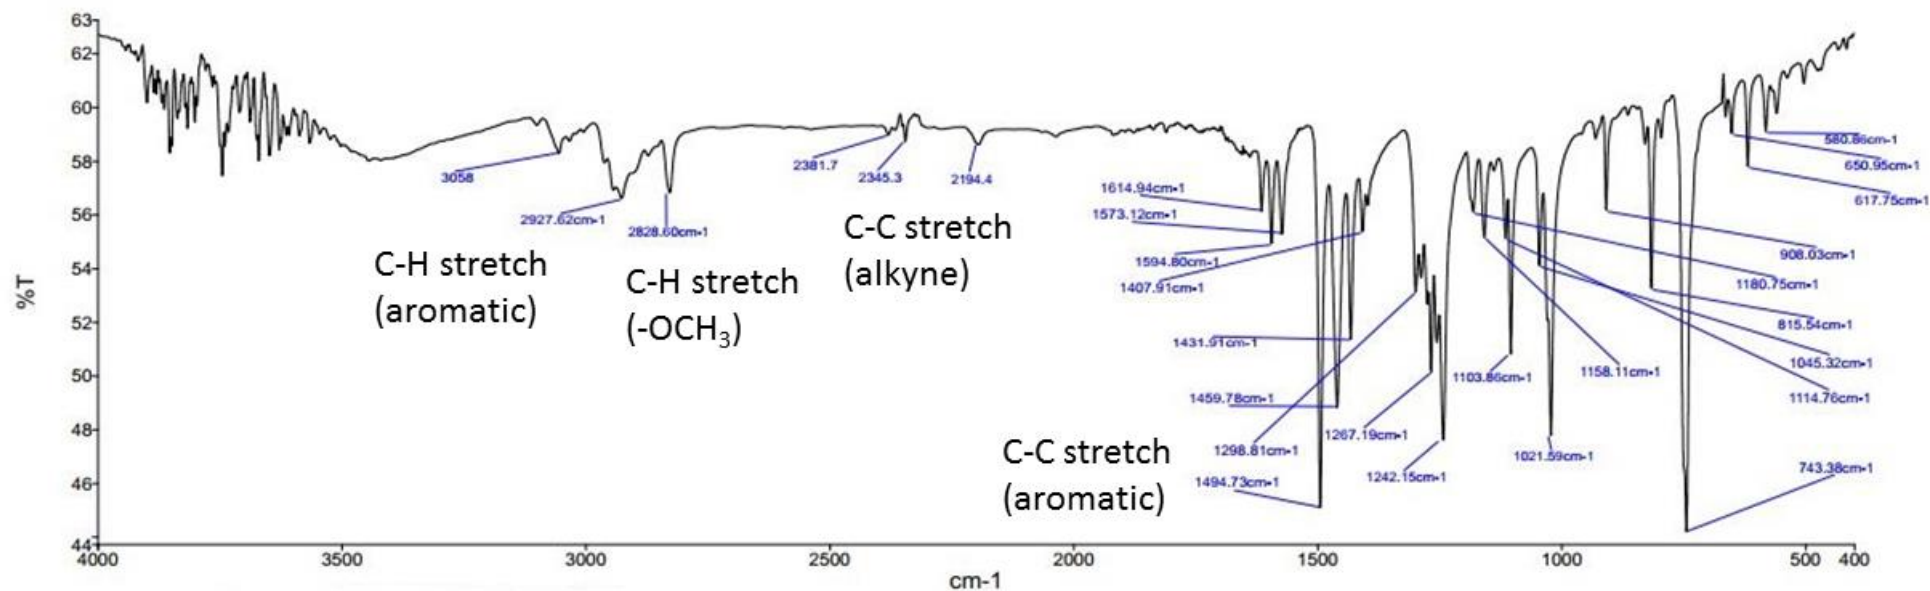

**Figure S74.** IR spectrum of **6b** in KBr pellet

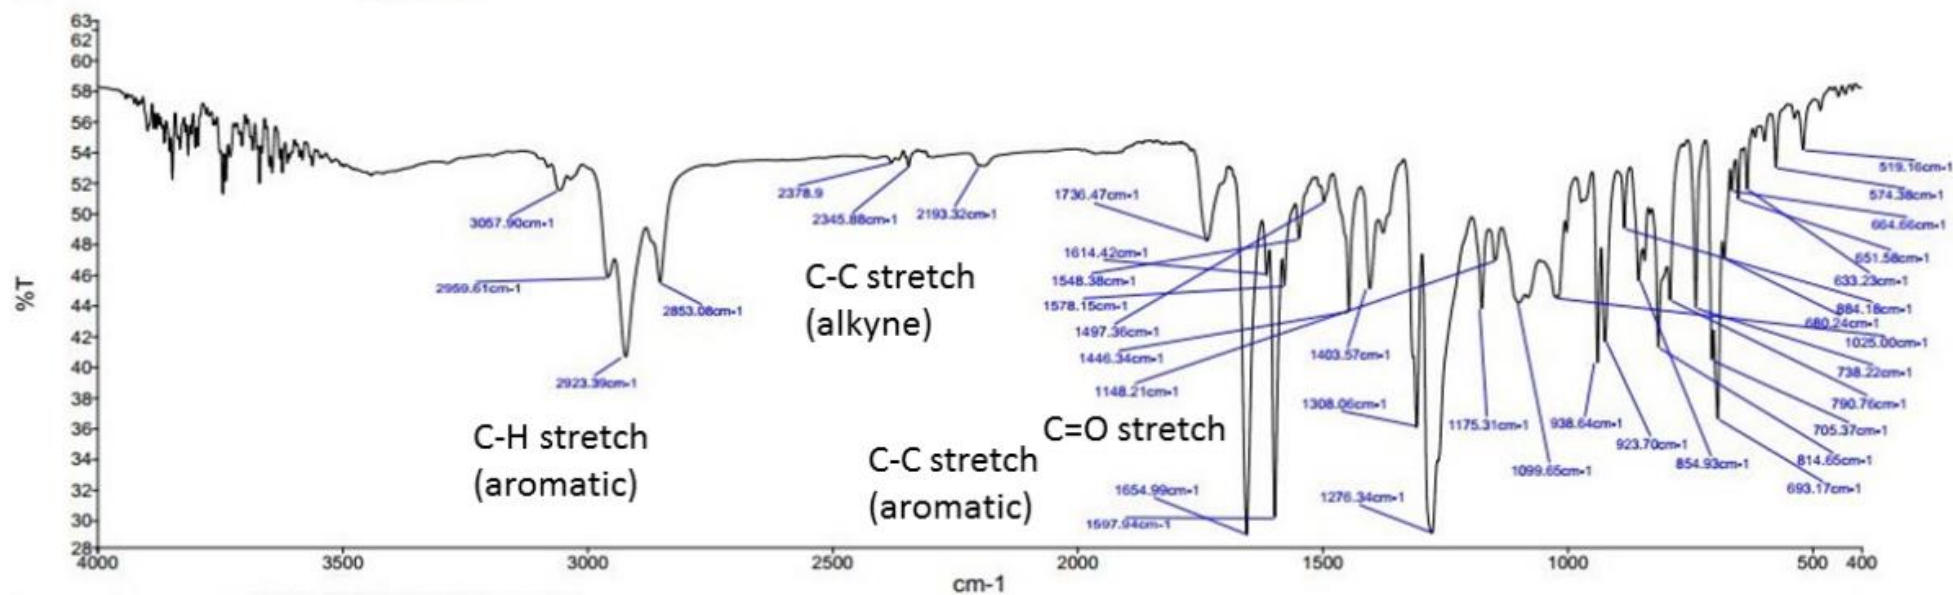

**Figure S75.** IR spectrum of **6d** in KBr pellet.

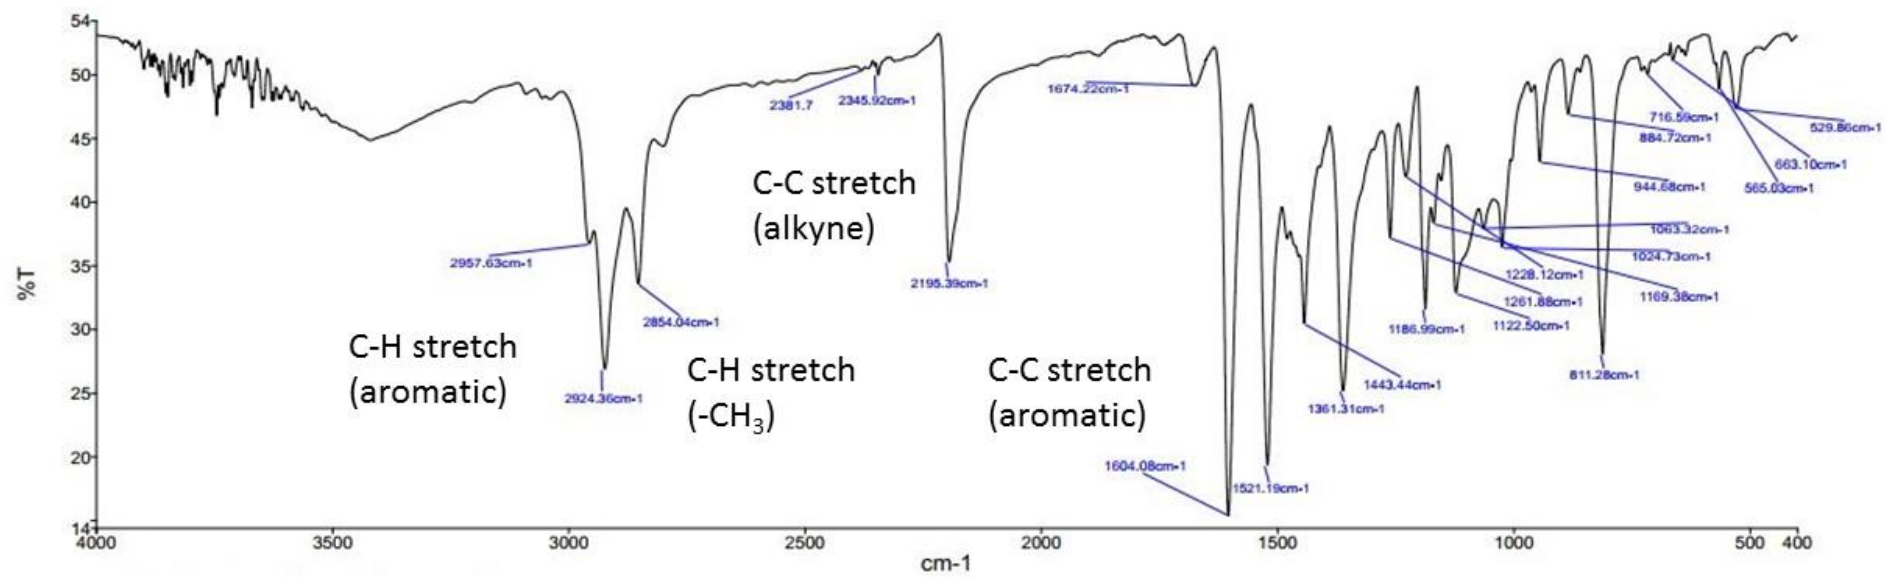

**Figure S76.** IR spectrum of **6e** in KBr pellet.

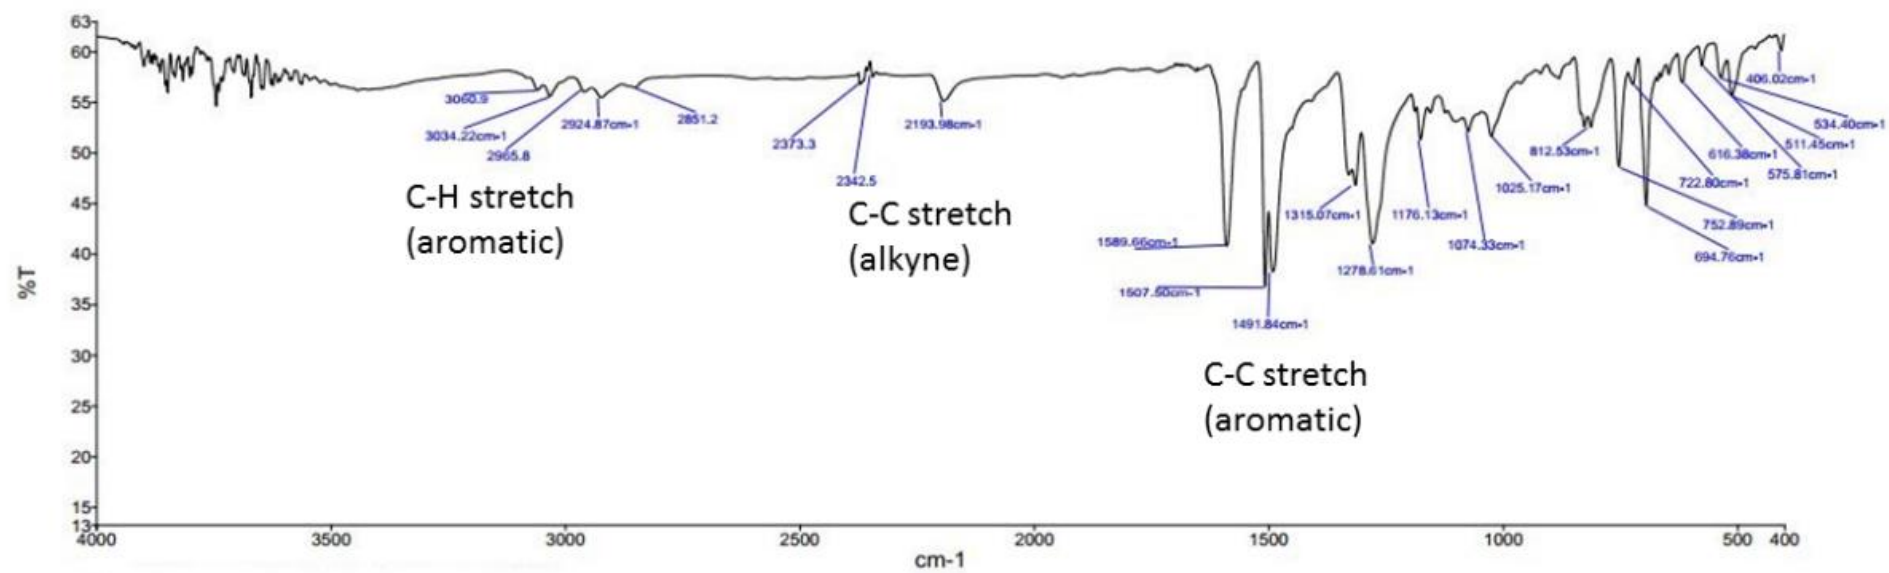

**Figure S77.** IR spectrum of **6f** in KBr pellet.



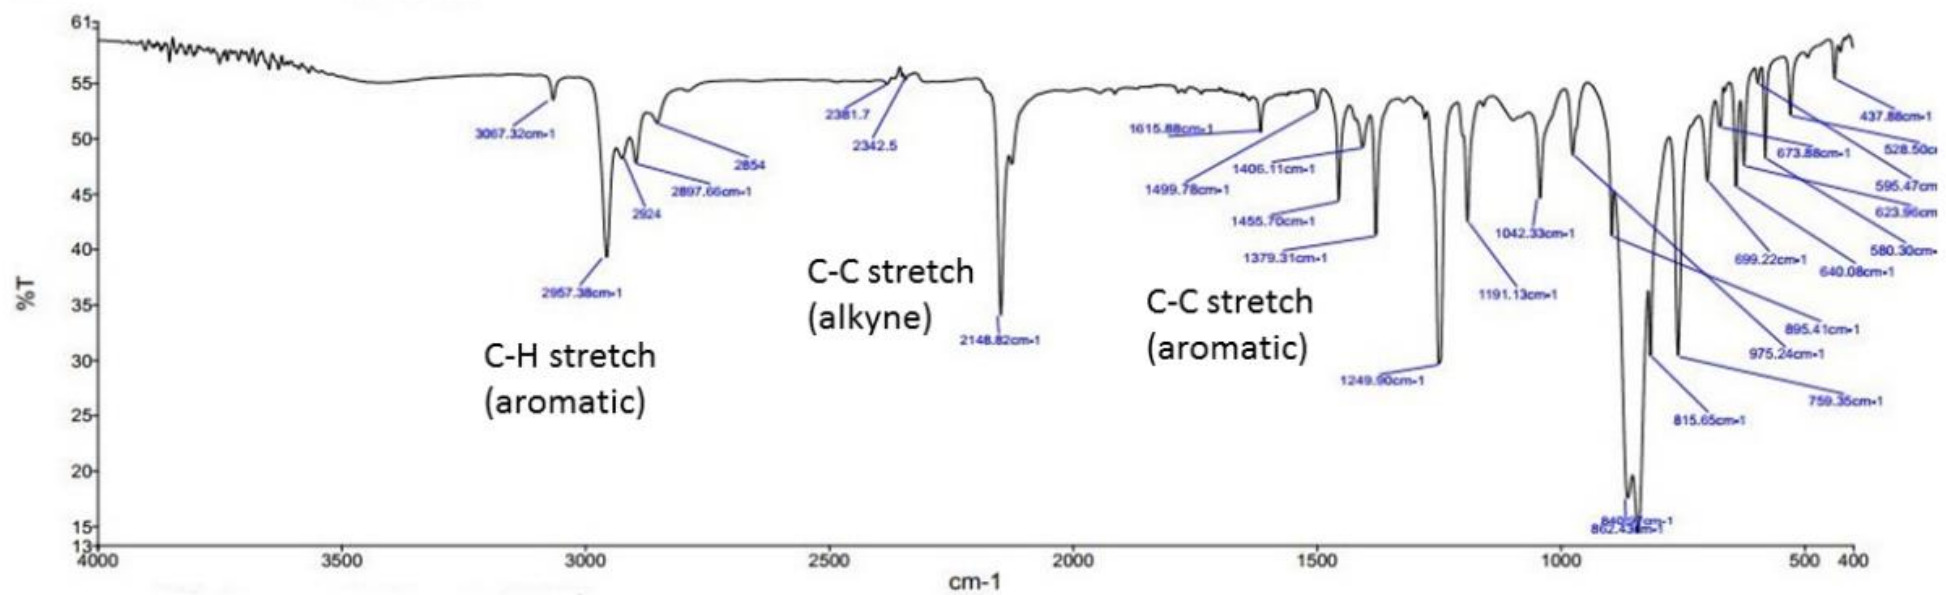

**Figure S78.** IR spectrum of **6g** in KBr pellet.

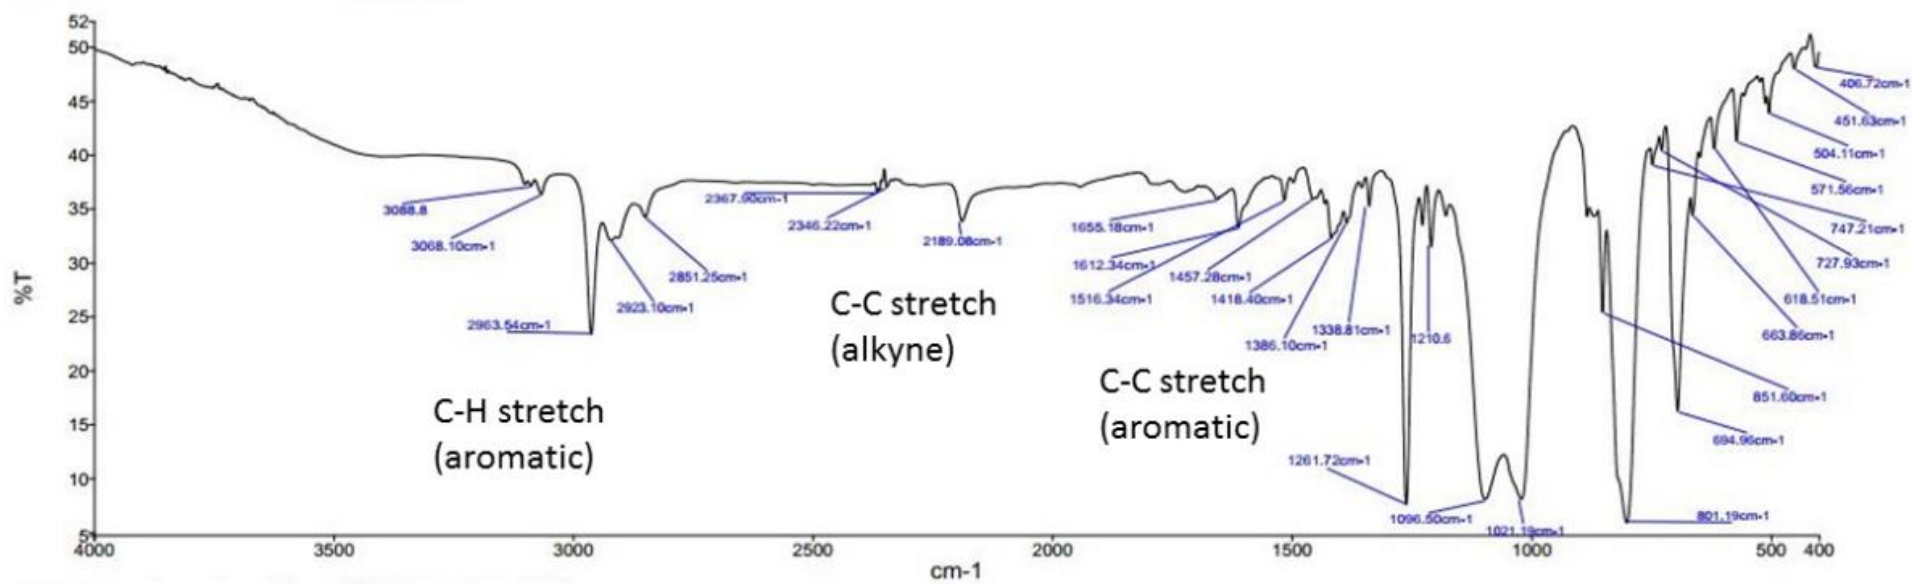

Figure S79. IR spectrum of **6h** in KBr pellet.

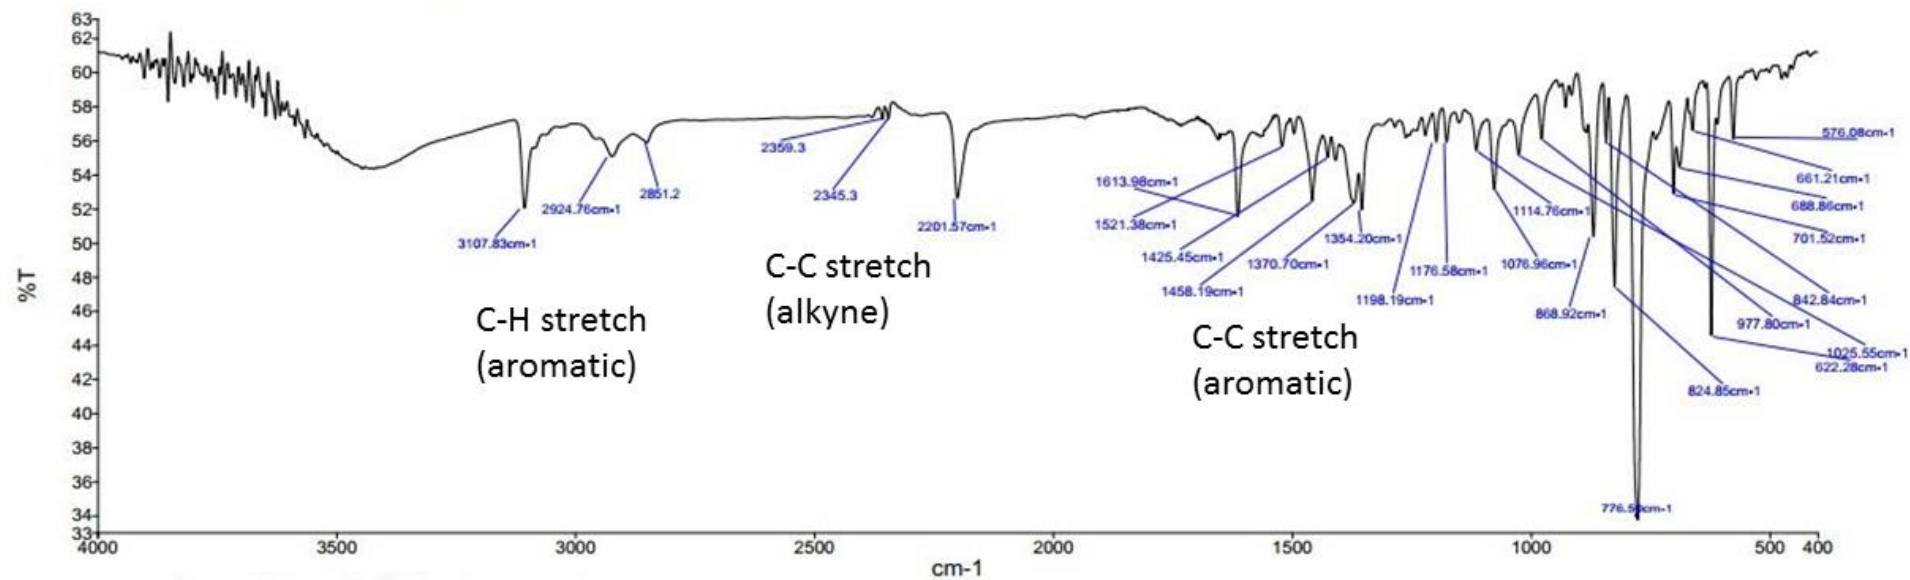

Figure S80. IR spectrum of **6i** in KBr pellet.
